# Supplementary material for: High facial selectivity observed in amine coordination to chiral oxazaborolidinones
Source: Royal Society of Chemistry journal article supplement (doi:10.1039/b413370f), 2004-12-16

Current Data Parameters  
 NAME 11C-214-PC  
 EXPNO 1  
 PROCNO 1  
 F2 - Acquisition Parameters  
 Date\_ 20031017  
 Time 10.13  
 INSTRUM dr500  
 PROBHD 5 mm Multi1nucl1  
 PULPROG zg30  
 TD 65536  
 SOLVENT CDCl3  
 NS 16  
 DS 2  
 SWH 10330.578 Hz  
 FIDRES 0.157632 Hz  
 AQ 3.1719923 sec  
 RG 128  
 DW 48.400 usec  
 DE 6.00 usec  
 TE 295.9 K  
 D1 1.0000000 sec  
 MCREST 0.0000000 sec  
 MCWRK 0.0150000 sec  
 ===== CHANNEL f1 =====  
 NUC1 1H  
 P1 10.30 usec  
 PL1 -6.00 dB  
 SFO1 500.1330885 MHz  
 F2 - Processing parameters  
 SI 32768  
 SF 500.1300129 MHz  
 WDW EM  
 SSB 0  
 LB 0.30 Hz  
 GB 0  
 PC 1.00  
 1D NMR plot parameters  
 CX 24.00 cm  
 CY 0.00 cm  
 F1 9.175 ppm  
 F2 4888.67 Hz  
 F3 0.175 ppm  
 F4 87.50 Hz  
 PPMCM 0.37500 ppm/cm  
 HZCM 187.54875 Hz/cm

8.01562  
7.67680  
7.66402  
7.34614  
7.33143  
7.30064  
7.29273  
7.28663  
7.28510  
7.27847  
7.26179  
7.20295  
7.20017  
7.18667  
7.17266  
7.15791  
7.13875  
6.89985  
6.88367  
6.82842  
6.81184  
6.43830  
6.42370  
4.72338  
4.71892  
4.71160  
4.00877  
4.00416  
3.99801  
3.99334  
3.66852  
3.65763  
3.64124  
3.63041  
3.48927  
3.48515  
3.45203  
3.45792  
3.13456  
3.12117  
2.97440  
2.96634  
2.94428  
2.93859  
2.78974  
2.78420  
2.32179  
2.28052  
1.88553  
1.87232  
1.85891  
1.64843  
1.63773  
1.62235  
1.60952  
1.59477  
1.41844

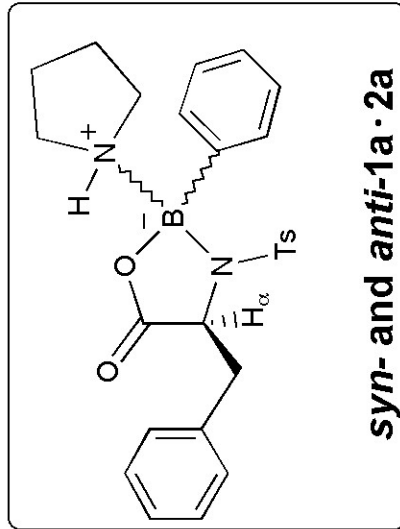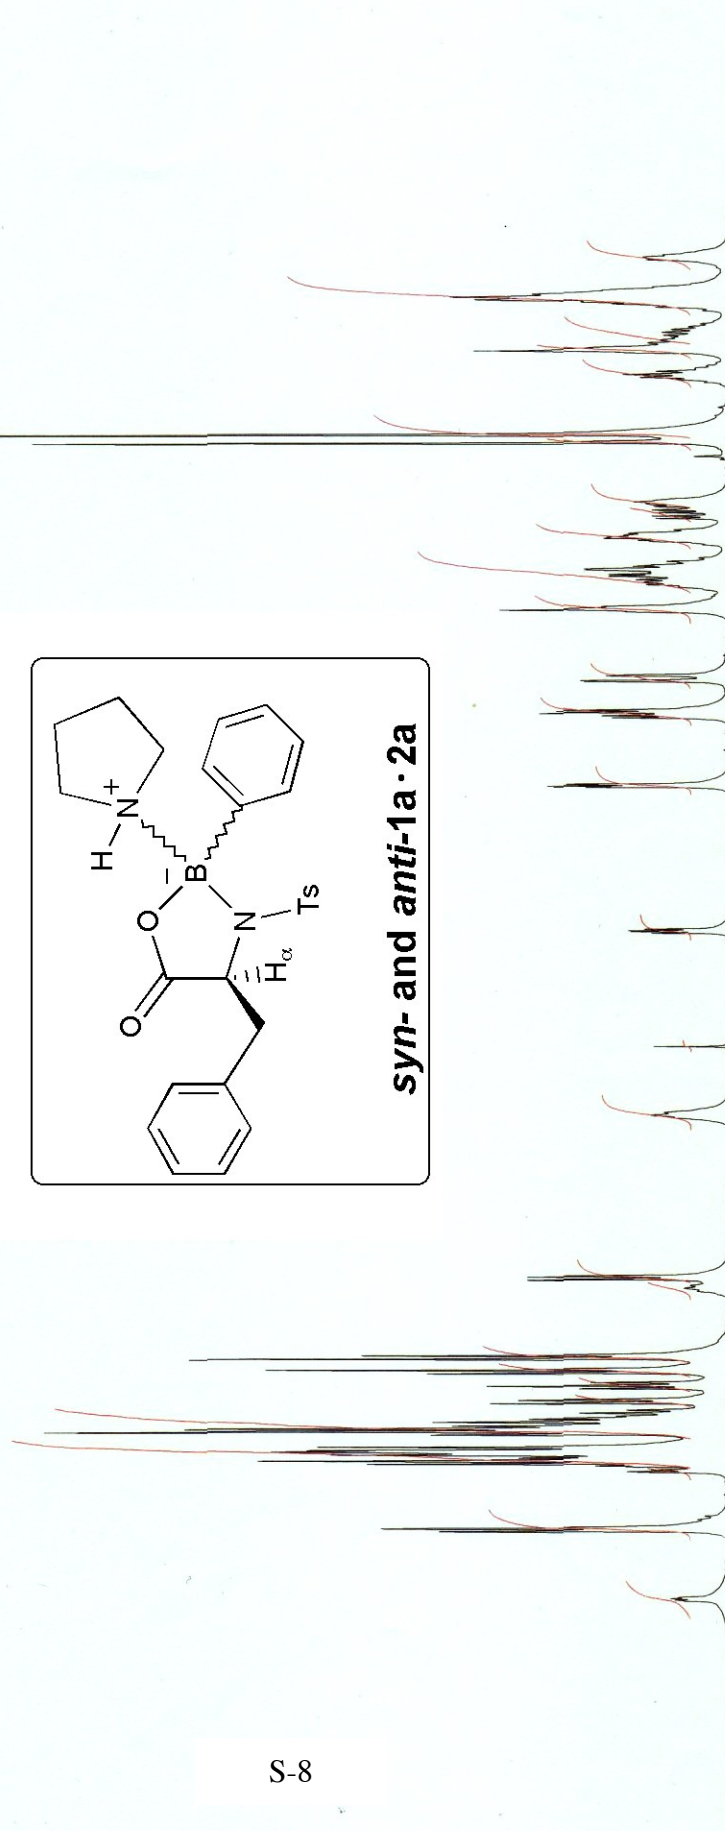

|        |
|--------|
| 1.0877 |
| 4.2515 |
| 1.3295 |
| 1.6310 |
| 1.1476 |
| 3.3521 |
| 1.5220 |
| 1.0463 |
| 0.6393 |
| 1.6423 |
| 2.8866 |
| 1.6491 |
| 1.0498 |
| 1.5918 |
| 1.0000 |
| 0.5245 |
| 0.0732 |
| 0.9371 |
| 1.1953 |
| 0.4459 |
| 2.1970 |
| 2.0209 |
| 1.1769 |
| 1.2120 |
| 6.7040 |
| 7.1542 |
| 0.4534 |
| 2.1242 |
| 0.6802 |

Integral

ppm

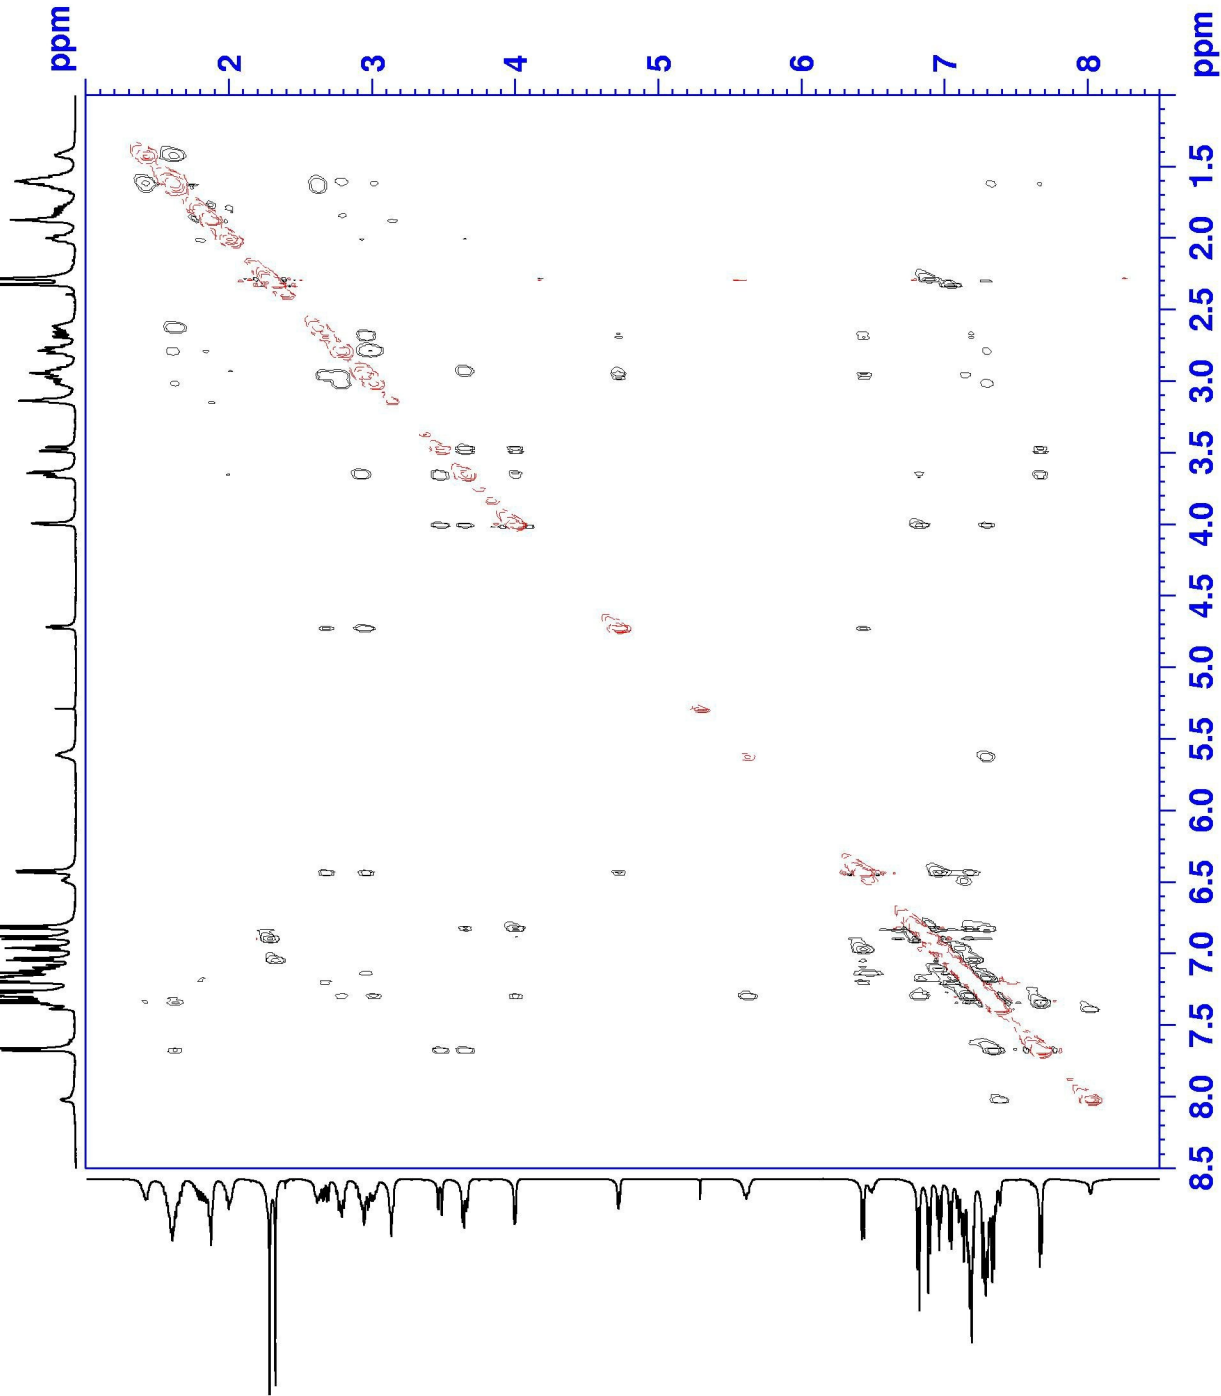

Current Data Parameters  
 NAME 11C-214-PB  
 EXPNO 5  
 PROCNO 1

F2 - Acquisition Parameters  
 Date\_ 20031016  
 Time 21.53  
 INSTRUM drx500  
 PROBHD 5 mm Multinucl  
 PULPROG noesyph  
 TD 2048  
 ID 2048  
 SOLVENT CDCl3  
 NS 16  
 DS 4  
 SWH 5081.301 Hz  
 FIDRES 2.481104 Hz  
 AQ 0.2015732 sec  
 RG 71.8  
 DW 98.400 usec  
 DE 6.00 usec  
 TE 296.0 K  
 G0 0.00008529 sec  
 D1 2.08028102 sec  
 D8 2.00000000 sec  
 INO 0.00019680 sec  
 MCREST 0.00000000 sec  
 MCWRK 1.04014051 sec  
 STCNT 128

==== CHANNEL f1 =====  
 NUC1 1H  
 P1 10.30 usec  
 PL1 -6.00 dB  
 SF01 500.1322720 MHz

F1 - Acquisition parameters  
 ND0 1  
 TD 256  
 SF01 500.1323 MHz  
 FIDRES 19.848831 Hz  
 SW 10.160 ppm  
 EnMODE States-TPPI

F2 - Processing parameters  
 SI 1024

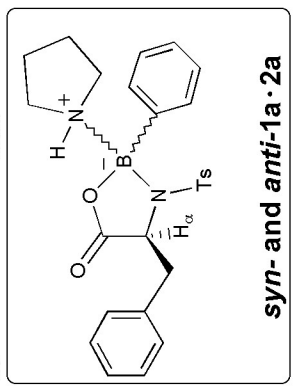

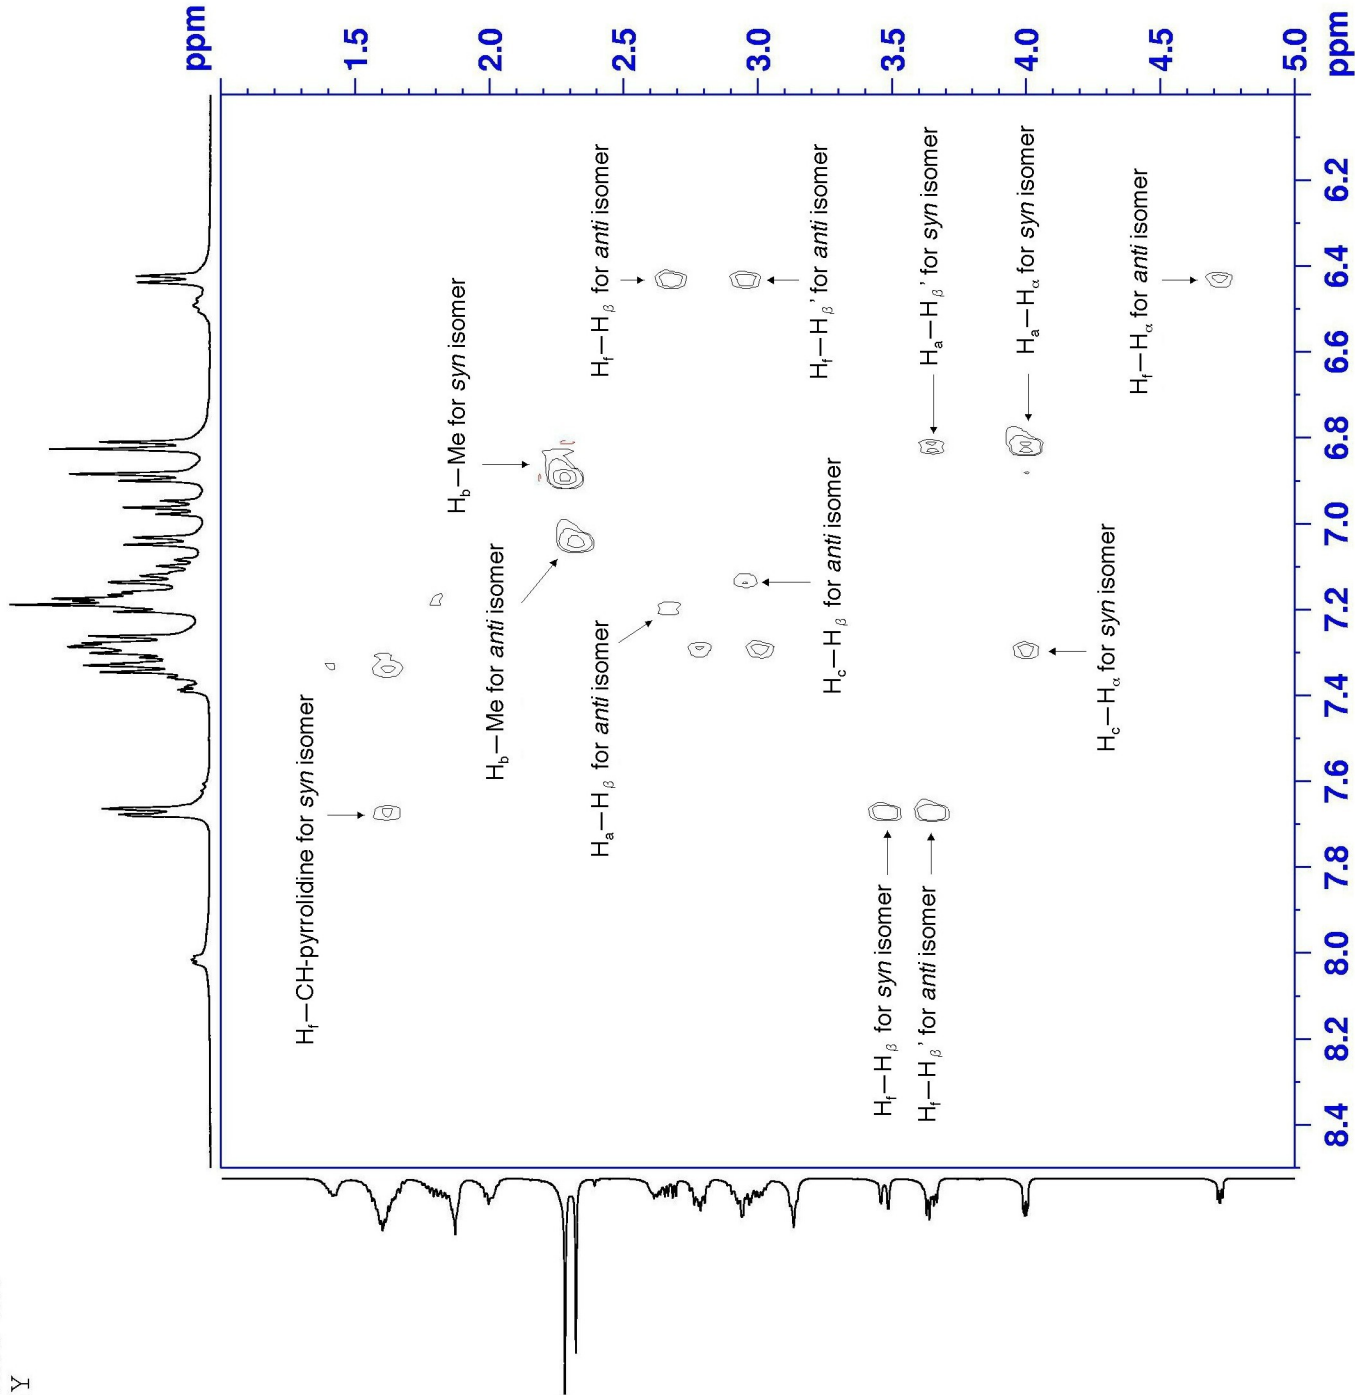

Current Data Parameters  
 NAME 11C-214-PB  
 EXPNO 5  
 PROCNO 1

F2 - Acquisition Parameters  
 Date\_ 20031016  
 Time 21.53  
 INSTRUM drx500  
 PROBHD 5 mm Multinucl  
 PULPROG noesyph  
 ID 2048  
 SOLVENT CDC13  
 NS 16  
 DS 4  
 SWH 5081.301 Hz  
 FIDRES 2.481104 Hz  
 AQ 0.2015732 sec  
 RG 71.8  
 DW 98.400 usec  
 DE 6.00 usec  
 TE 296.0 K  
 d0 0.00008529 sec  
 D1 2.08028102 sec  
 D8 2.00000000 sec  
 IN0 0.00019680 sec  
 MCREST 0.00000000 sec

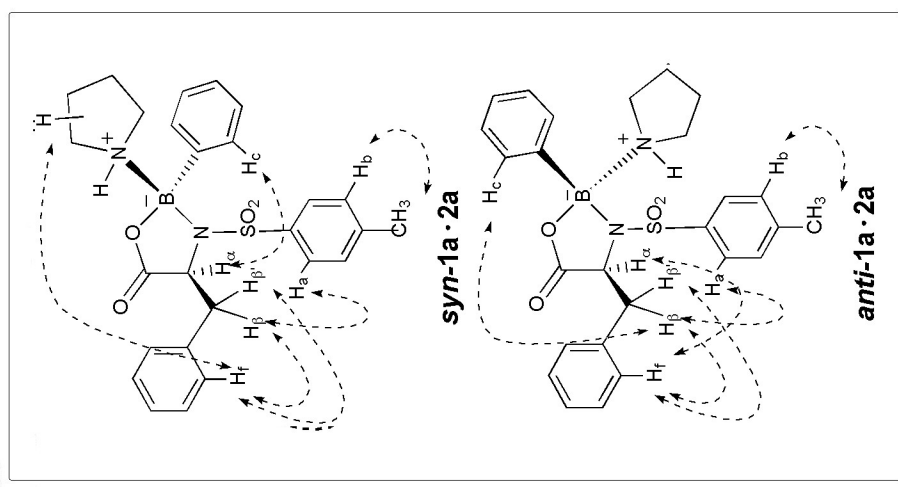

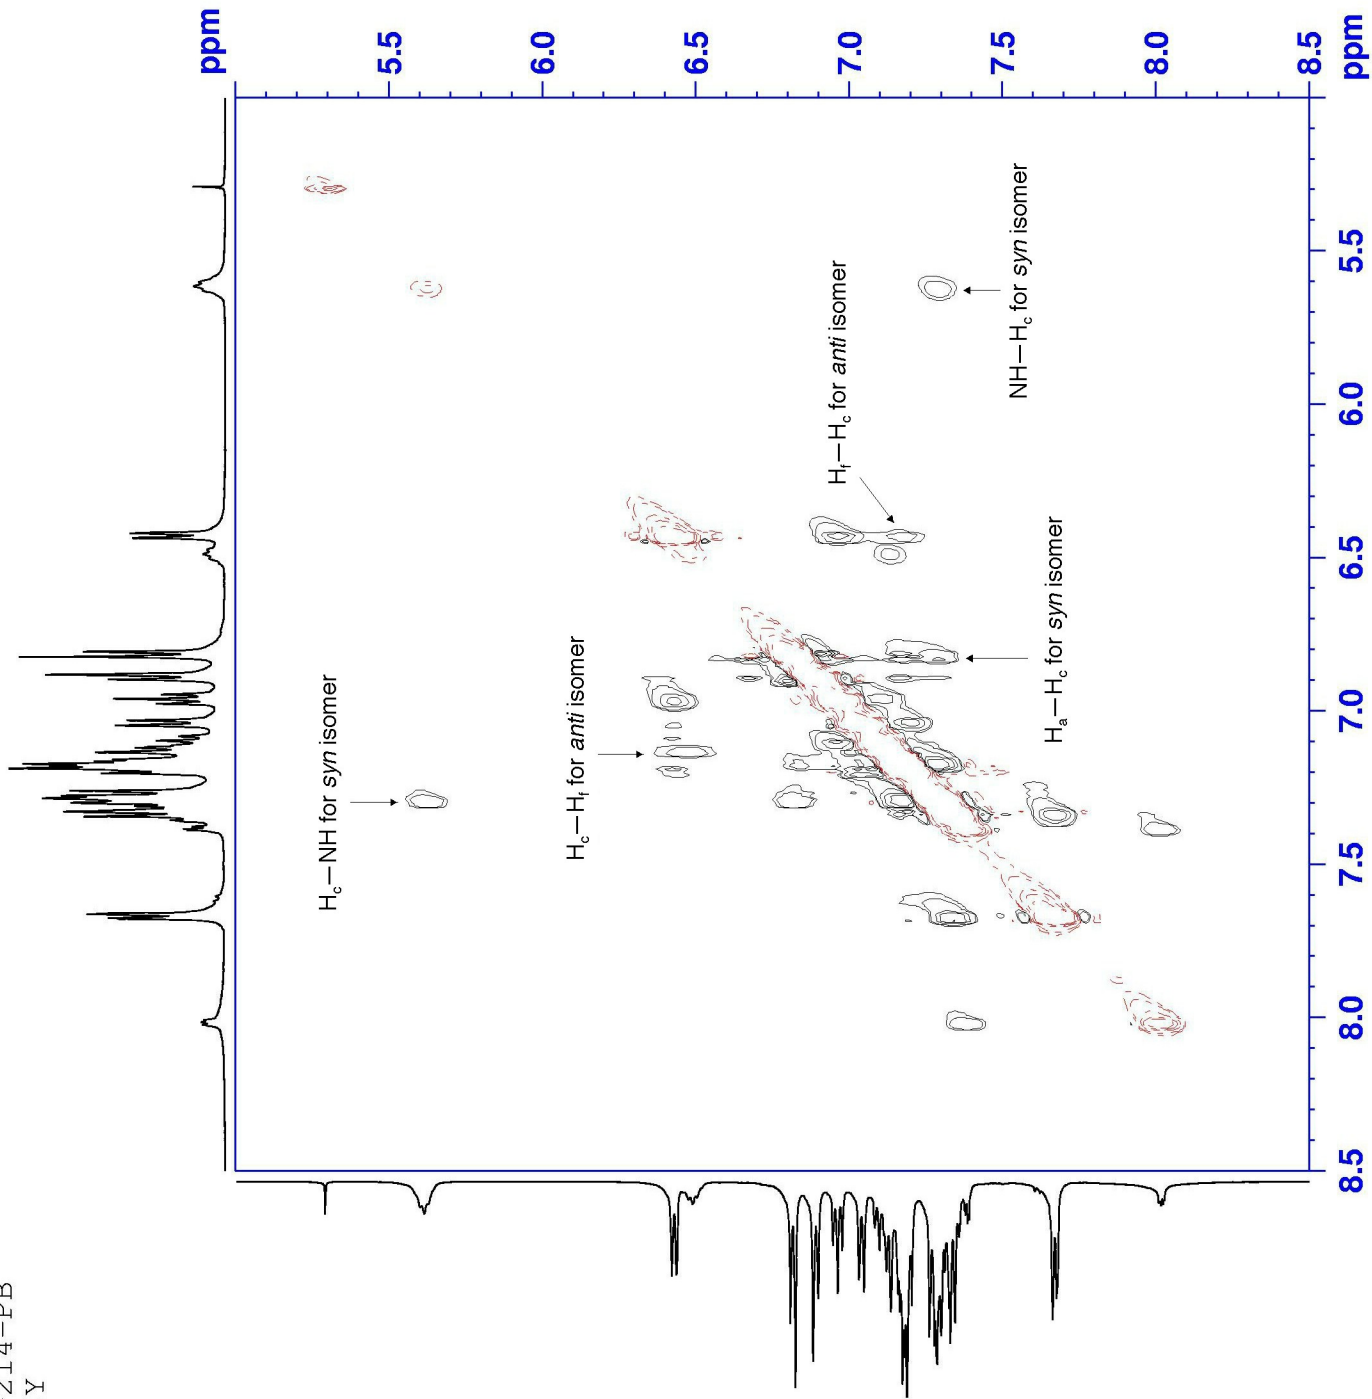

Current Data Parameters  
 NAME 11C-214-PB  
 EXPNO 5  
 PROCNO 1

F2 - Acquisition Parameters  
 Date\_ 20031016  
 Time 21.53  
 INSTRUM drx500  
 PROBHD 5 mm Multinucl  
 PULPROG noesyph  
 TD 2048  
 ID CDC13  
 NS 16  
 DS 4  
 SWH 5081.301 Hz  
 FIDRES 2.481104 Hz  
 AQ 0.2015732 sec  
 RG 71.8  
 DW 98.400 usec  
 DE 6.00 usec  
 TE 296.0 K  
 d0 0.00008529 sec  
 D1 2.08028102 sec  
 D8 2.00000000 sec  
 INO 0.00019680 sec  
 MCREST 0.00000000 sec  
 MCWRK 1.04014051 sec  
 STICNT 128

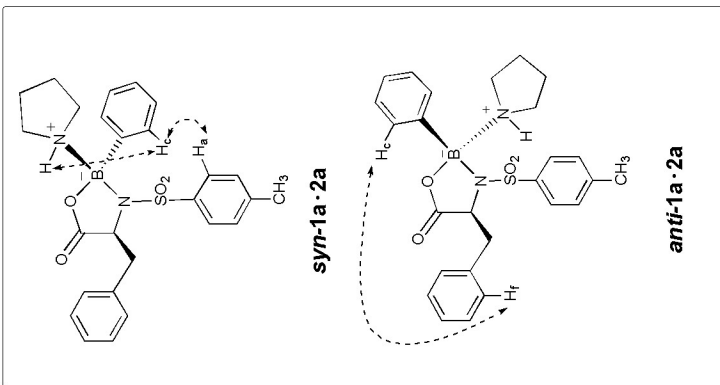

Supplement: b413370f-2.pdf [file b413370f-2.pdf]
