# Supplementary material for: High facial selectivity observed in amine coordination to chiral oxazaborolidinones
Source: Royal Society of Chemistry journal article supplement (doi:10.1039/b413370f), 2004-12-16

No title

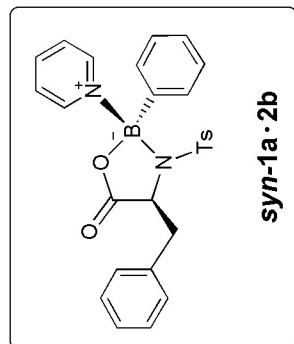

Current Data Parameters  
NAME 11C-20-PB  
EXPNO 1  
PROCNO 1

F2 - Acquisition Parameters  
Date\_ 500000  
Time 18.53  
INSTRUM DRX500  
PROBHD 5 mm Multinu  
PULPROG zg30  
TD 32768  
SOLVENT CDCl3  
NS 16  
DS 2  
SWH 10330.578 Hz  
FIDRES 0.315264 Hz  
AQ 1.5860212 sec  
RG 90.5  
DW 48.400 usec  
DE 6.00 usec  
TE 300.0 K  
D1 1.00000000 sec  
P1 9.30 usec  
DE 6.00 usec  
SF01 500.1330885 MHz  
NUC1 1H  
PL1 -6.00 dB

F2 - Processing parameters  
SI 16384  
SF 500.1300000 MHz  
WDW EM  
SSB 0  
LB 0.30 Hz  
GB 0  
PC 1.00

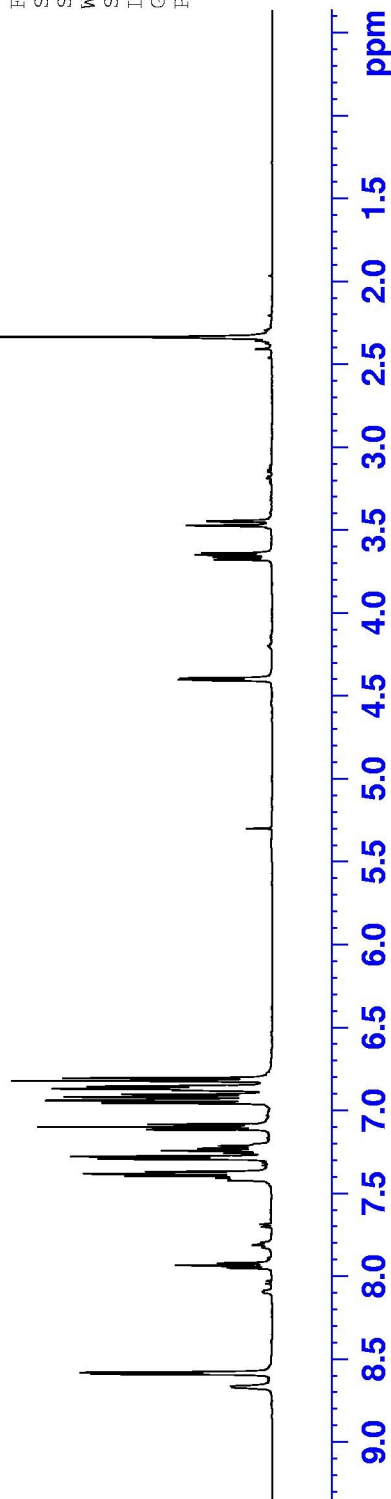

Current Data Parameters  
 11C-20-P-D  
 EXPNO 4  
 PROCNO 1

F2 - Acquisition Parameters  
 Date\_ 500000  
 Time 20.37  
 INSTRUM DRX500  
 PROBHD 5 mm Multinu  
 PULPROG noesytd  
 TD 2048  
 SOLVENT CDCl3  
 NS 16  
 DS 4  
 SWH 4807.692 Hz  
 FIDRES 2.347506 Hz  
 AQ 0.2130420 sec  
 RG 64  
 DW 104.000 usec  
 DE 6.00 usec  
 TE 300.0 K  
 d0 0.0000030 sec  
 D1 2.00000000 sec  
 P1 9.30 usec  
 D8 2.00000000 sec  
 DE 6.00 usec  
 SF01 500.1327265 MHz  
 NUC1 1H  
 PL1 -6.00 dB  
 INO 0.00010400 sec

F1 - Acquisition parameters  
 ND0 2  
 TD 512  
 SF01 500.1327 MHz  
 FIDRES 9.390024 Hz  
 SW 9.613 ppm

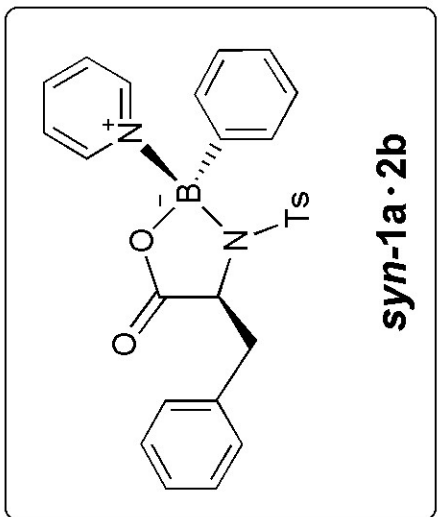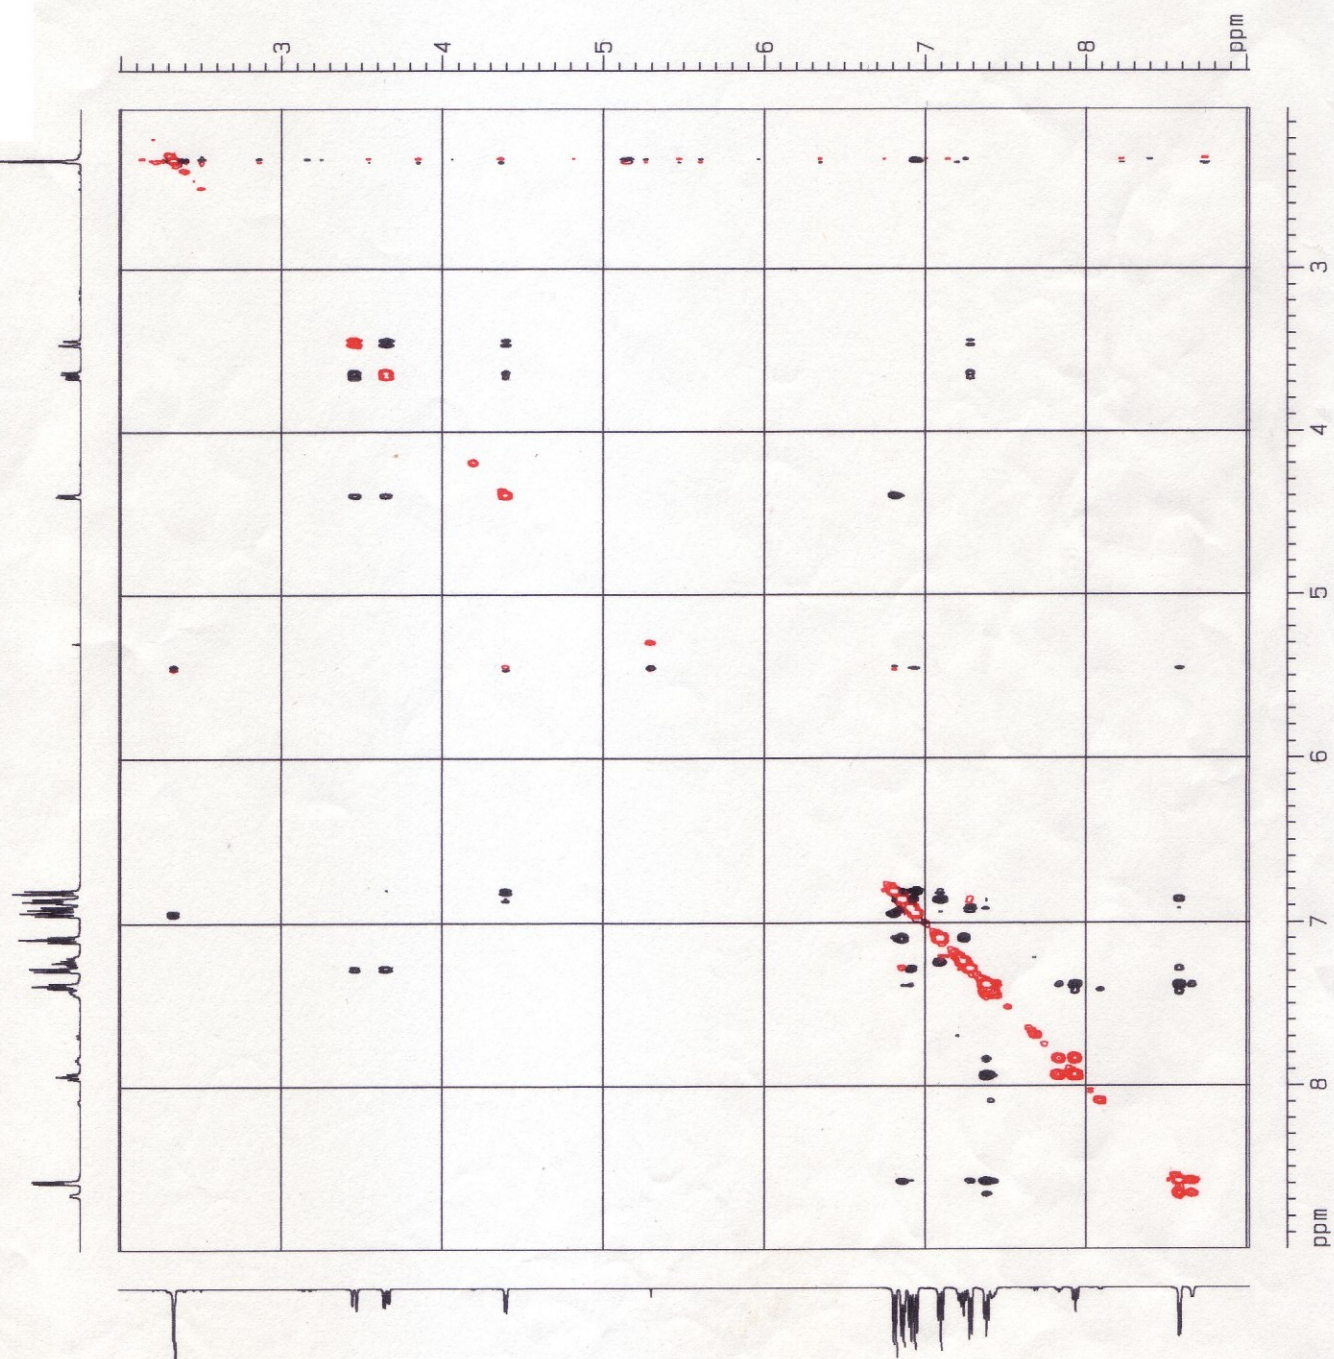



Current Data Parameters  
 NAME 11C-20-P-D  
 EXPNO 4  
 PROCNO 1

F2 - Acquisition Parameters  
 Date\_ 500000  
 Time 20.37  
 INSTRUM DRMS500  
 PROBHD 5 mm Multinu  
 PULPROG noesytd  
 TD 2048  
 SOLVENT CDCl3  
 NS 16  
 DS 4  
 SFO1 4807.692 Hz  
 FIDRES 2.347506 Hz  
 AQ 0.2130420 sec  
 RG 64  
 DW 104.000 usec  
 DE 6.00 usec  
 TE 300.0 K  
 d0 0.0000030 sec  
 D1 2.00000000 sec  
 P1 9.30 usec  
 D8 2.00000000 sec  
 DE 6.00 usec  
 SFO1 500.1327263 MHz  
 NUC1 1H  
 PL1 -6.00 dB  
 INO 0.00010400 sec

F1 - Acquisition parameters  
 NDO 2  
 TD 512  
 SFO1 500.1327 MHz  
 FIDRES 9.369024 Hz  
 SN 9.613 ppm

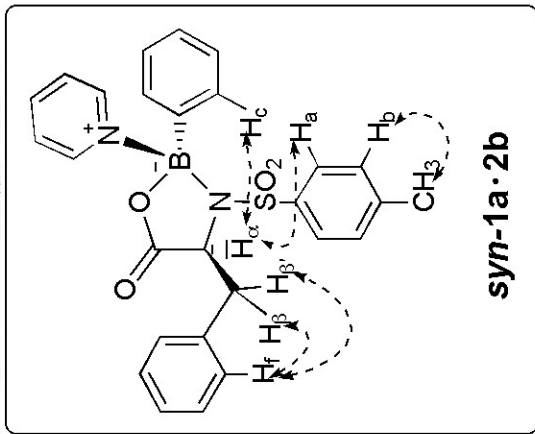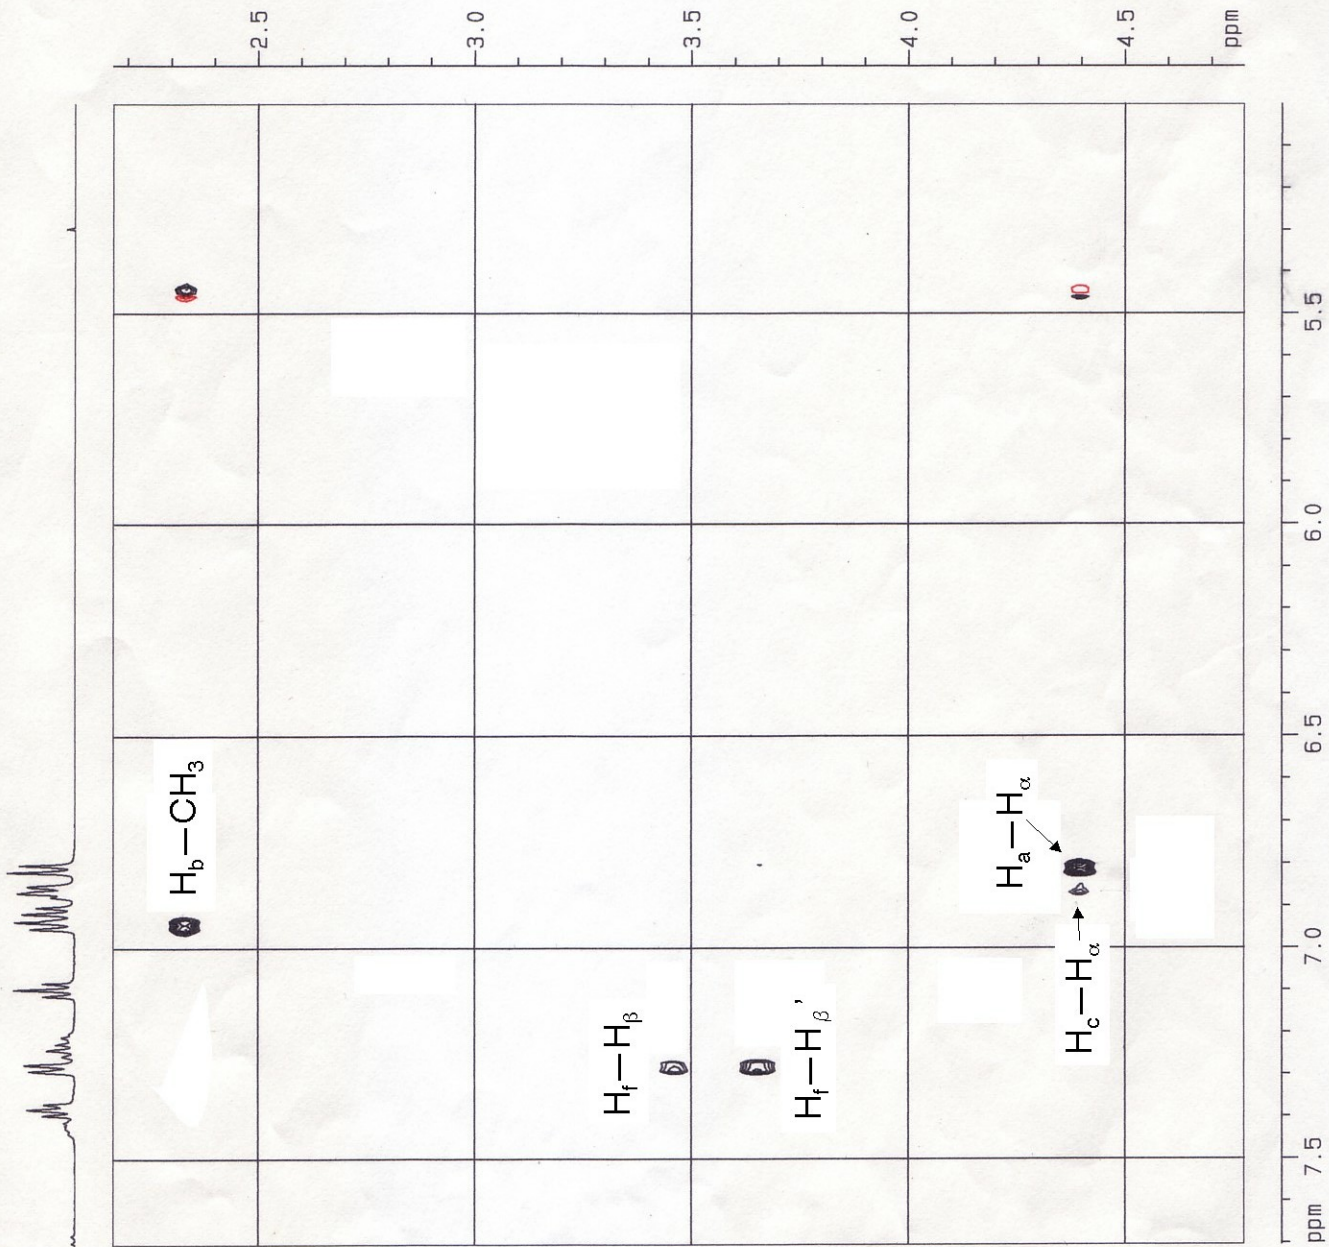



Current Data Parameters  
 NAME 11C-20-P-3  
 EXPNO 4  
 PROCNO 1

F2 - Acquisition Parameters  
 Date\_ 5000000  
 Time 20.37  
 INSTRUM DRX500  
 PROBHD 5 mm MLI1100  
 PULPROG noesytp  
 TD 2048  
 SOLVENT CDCl3  
 NS 16  
 DS 4  
 SMH 4807.692 Hz  
 F2 2.347506 Hz  
 FIDRES 0.2130420 sec  
 AQ 64  
 RG 104.000 usec  
 DE 6.00 usec  
 TE 300.0 K  
 D0 0.0000000 sec  
 P1 2.0000000 sec  
 PL 9.30 usec  
 DB 2.0000000 sec  
 DE 6.00 usec  
 SFO1 500.1327863 MHz  
 NUC1 1H  
 PL1 -6.00 dB  
 TMO 0.00010400 sec

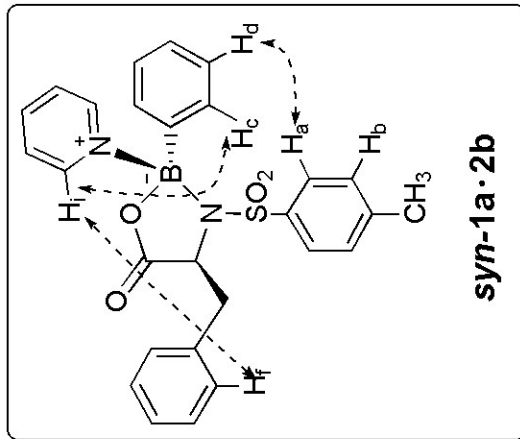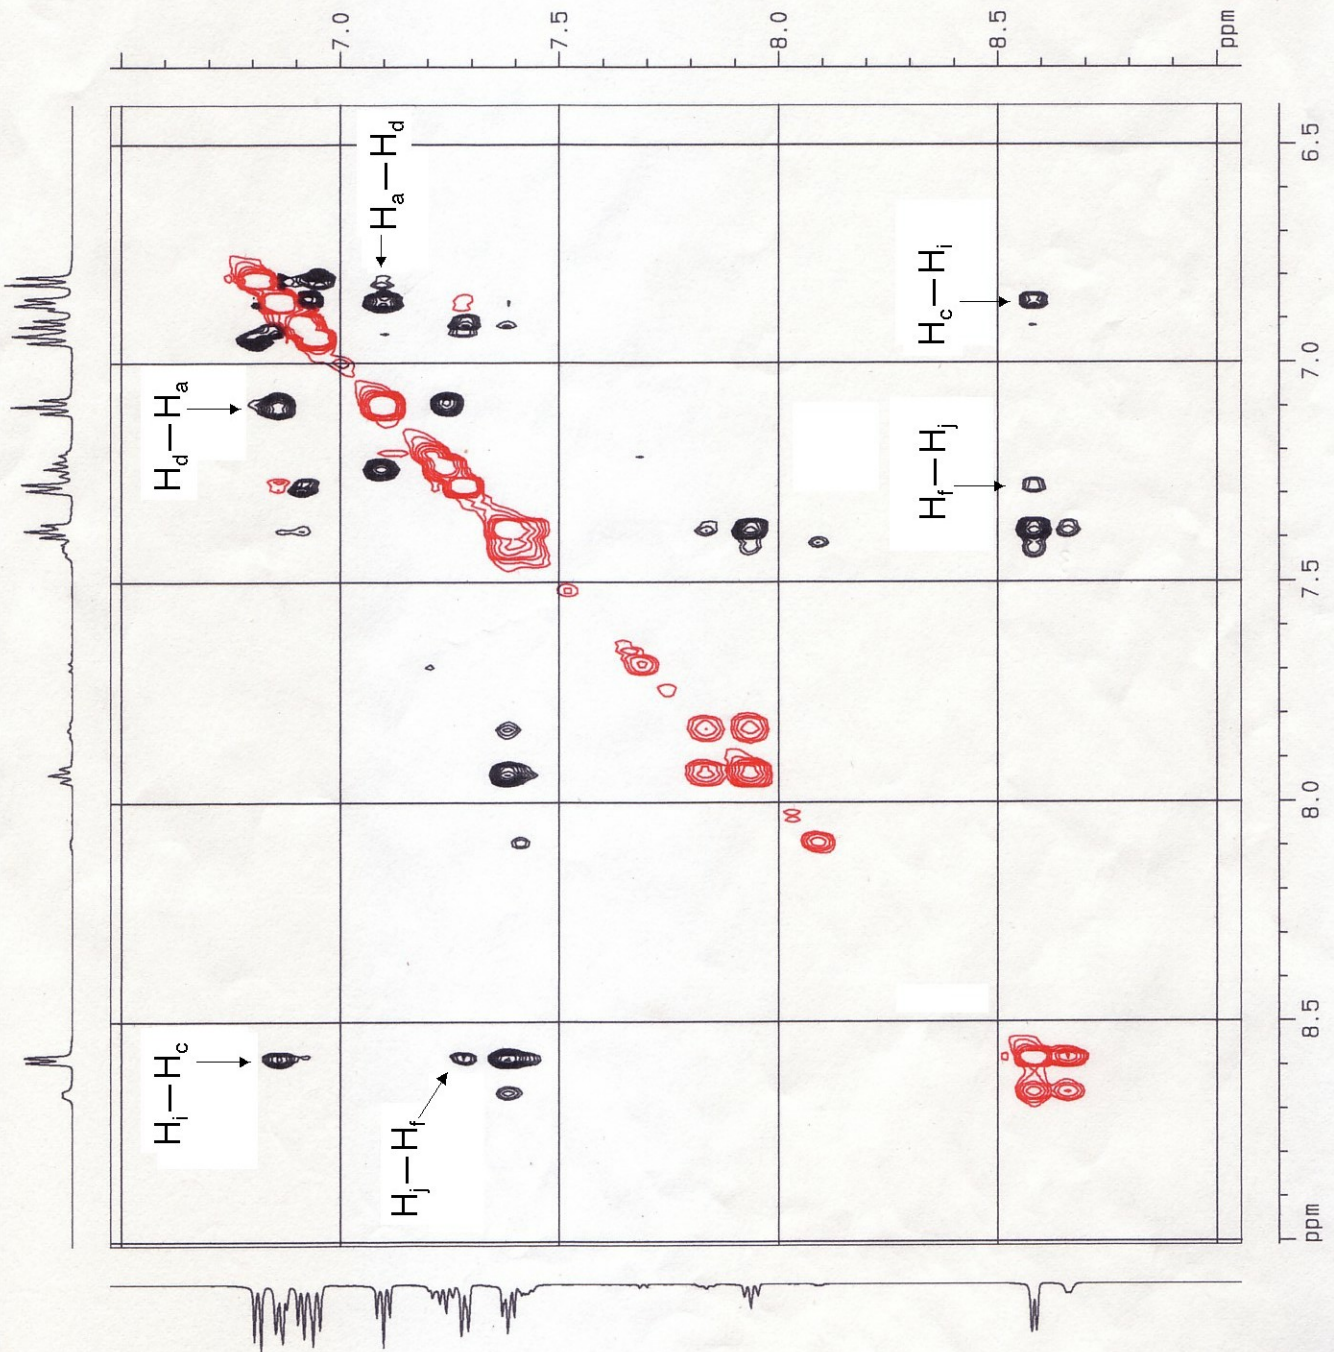

Supplement: b413370f-3.pdf [file b413370f-3.pdf]
