# Supplementary material for: High facial selectivity observed in amine coordination to chiral oxazaborolidinones
Source: Royal Society of Chemistry journal article supplement (doi:10.1039/b413370f), 2004-12-16

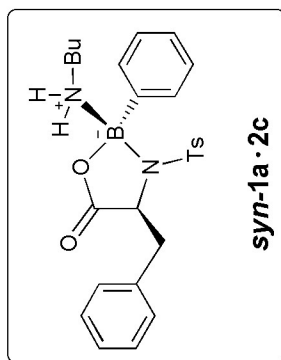

Current Data Parameters  
 NAME 11C-124-PC  
 EXPNO 1  
 PROCNO 1

F2 - Acquisition Parameters  
 Date\_ 20020806  
 Time 20.19  
 INSTRUM DRX500  
 PROBHD 5 mm Multinu  
 PULPROG zg30  
 TD 32768  
 SOLVENT C6D6  
 NS 16  
 DS 2  
 SWH 10330.578 Hz  
 FIDRES 0.315264 Hz  
 AQ 1.5860212 sec  
 RG 181  
 DW 48.400 usec  
 DE 6.00 usec  
 TE 300.0 K  
 D1 1.00000000 sec  
 P1 9.30 usec  
 SFO1 500.1330885 MHz  
 NUC1 1H  
 PL1 -6.00 dB

F2 - Processing parameters  
 SI 16384  
 SF 500.1300000 MHz  
 WDW EM  
 SSB 0  
 LB 0.30 Hz  
 GB 0  
 PC 1.00

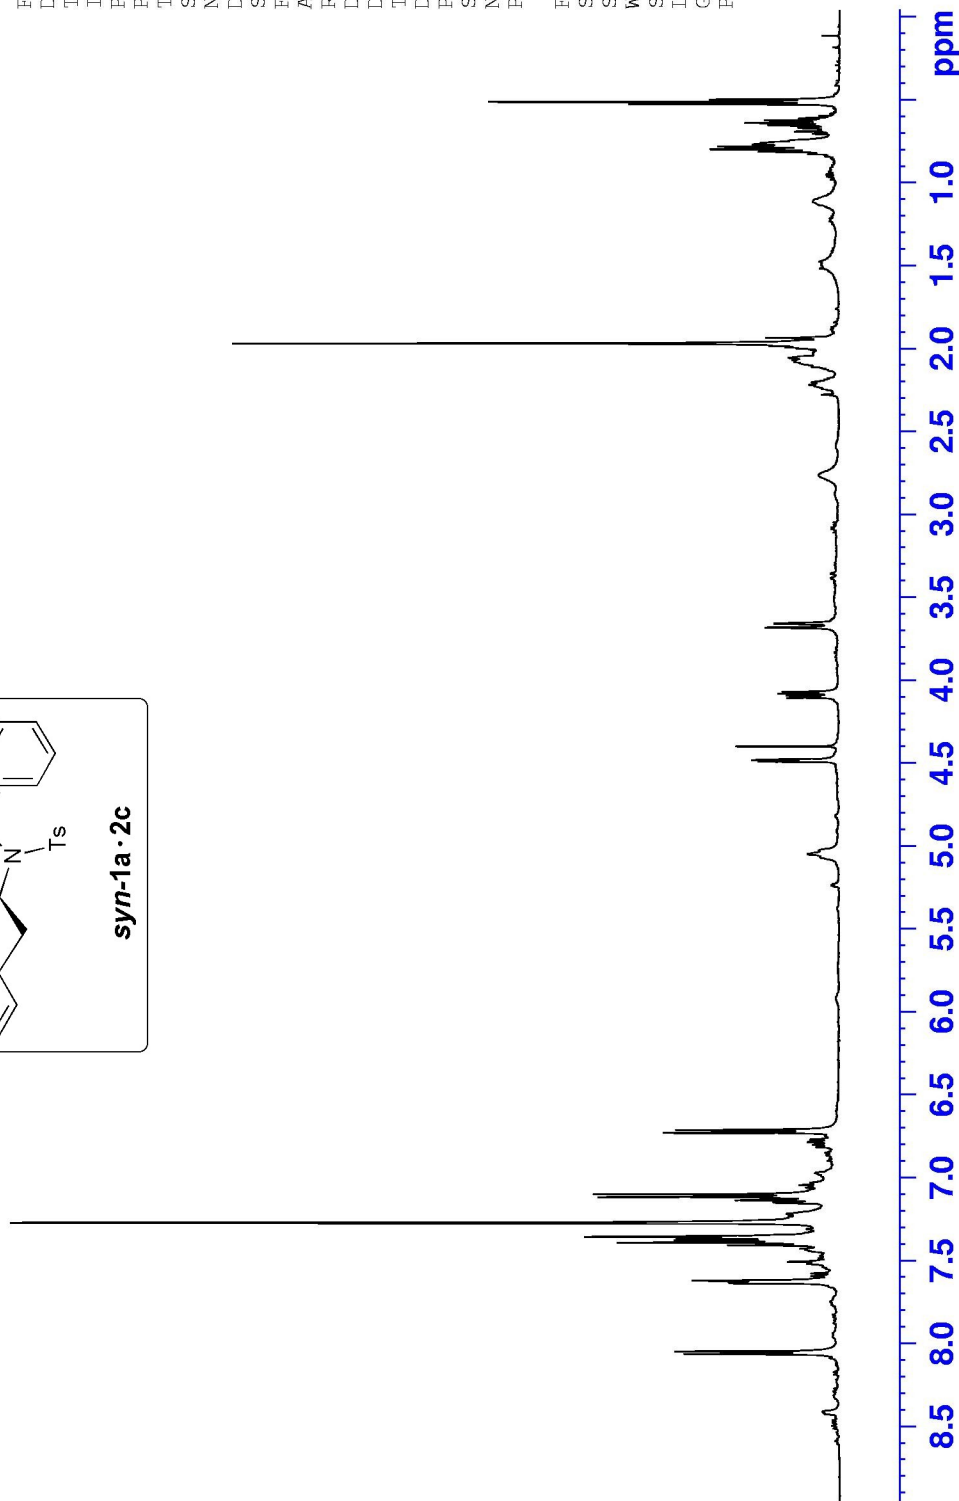

Current Data Parameters  
 NAME 11C-124-PC  
 EXPNO 3  
 PROCNO 1

F2 - Acquisition Parameters  
 Date\_ 20020806  
 Time 20.35  
 INSTRUM DRX500  
 PROBDH 5 mm Multinu  
 PULPROG noesytp  
 TD 2048  
 ID C6D6  
 NS 16  
 DS 4  
 SWH 5681.818 Hz  
 FIDRES 2.774325 Hz  
 AQ 0.1802740 sec  
 RG 181  
 DW 88.000 usec  
 DE 6.00 usec  
 TE 300.0 K  
 d0 0.00000300 sec  
 D1 2.00000000 sec  
 E1 9.30 usec  
 SFO1 500.1321210 MHz  
 NUC1 1H  
 FL1 -6.00 dB  
 D8 2.00000000 sec  
 IN0 0.00008800 sec

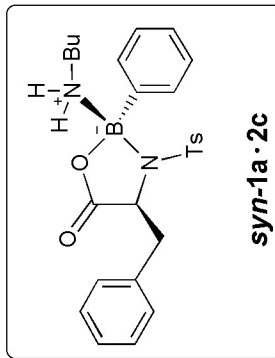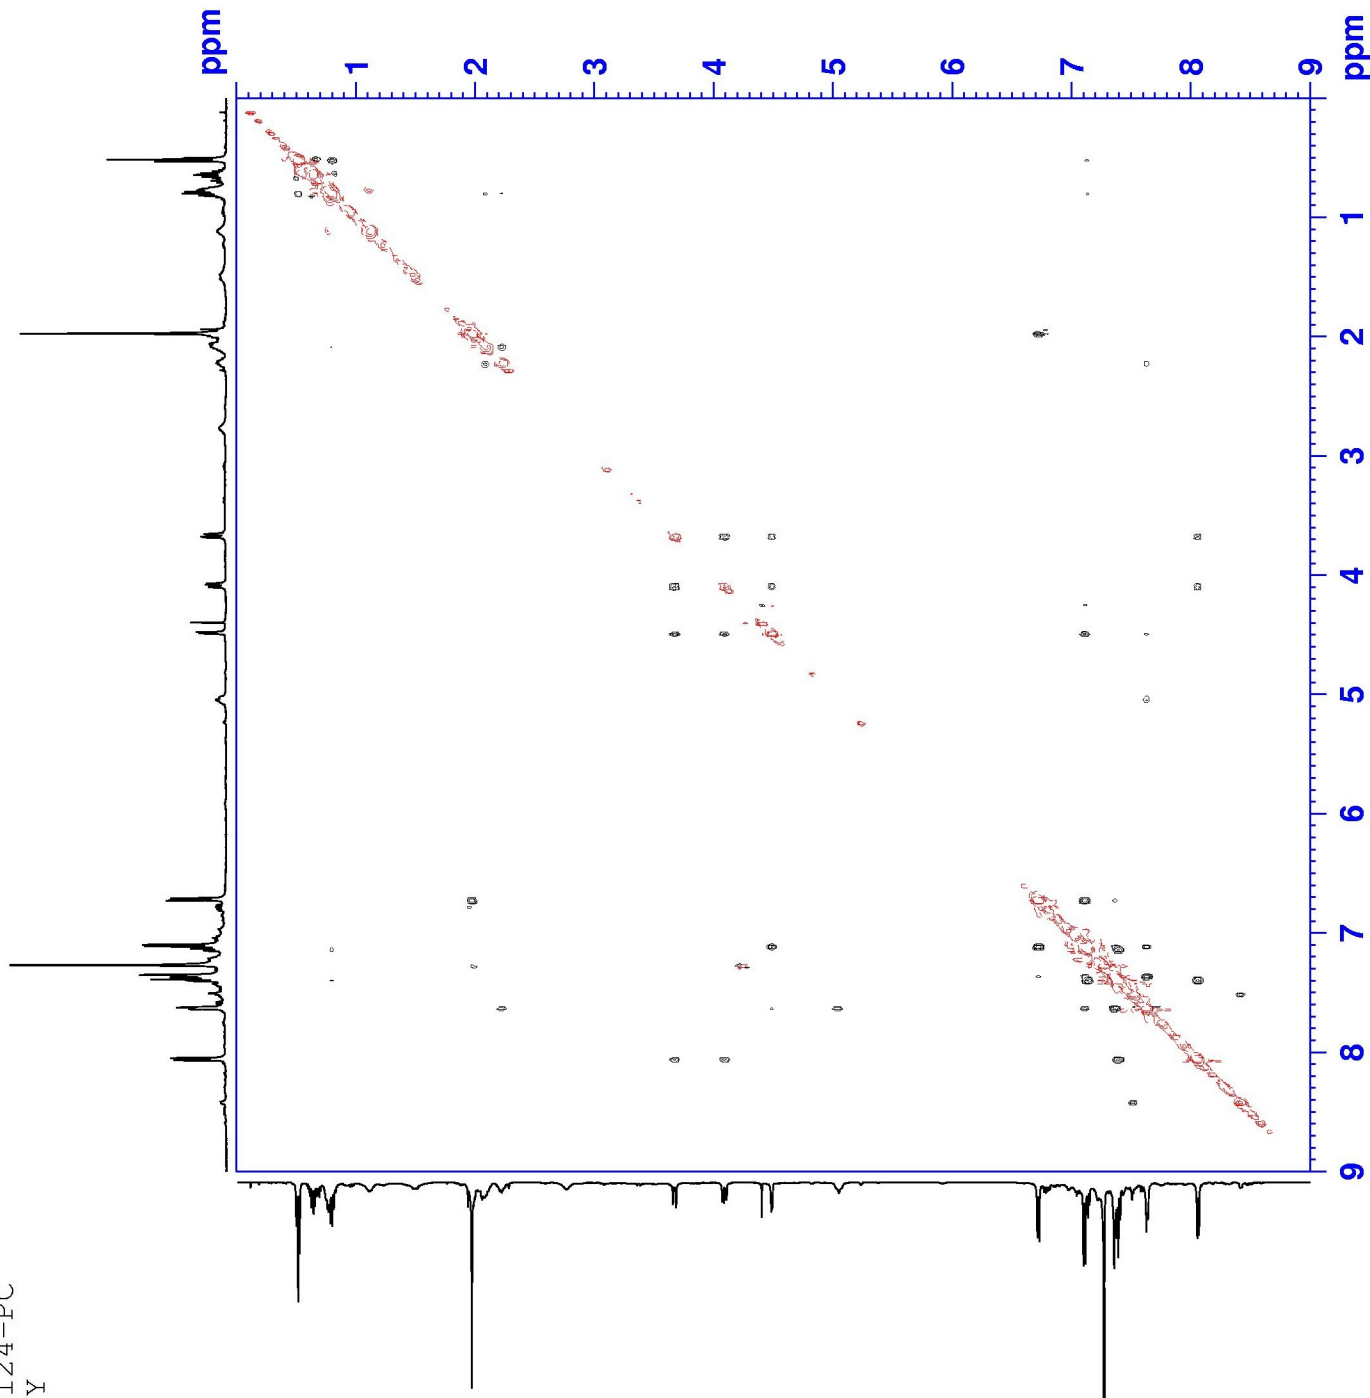

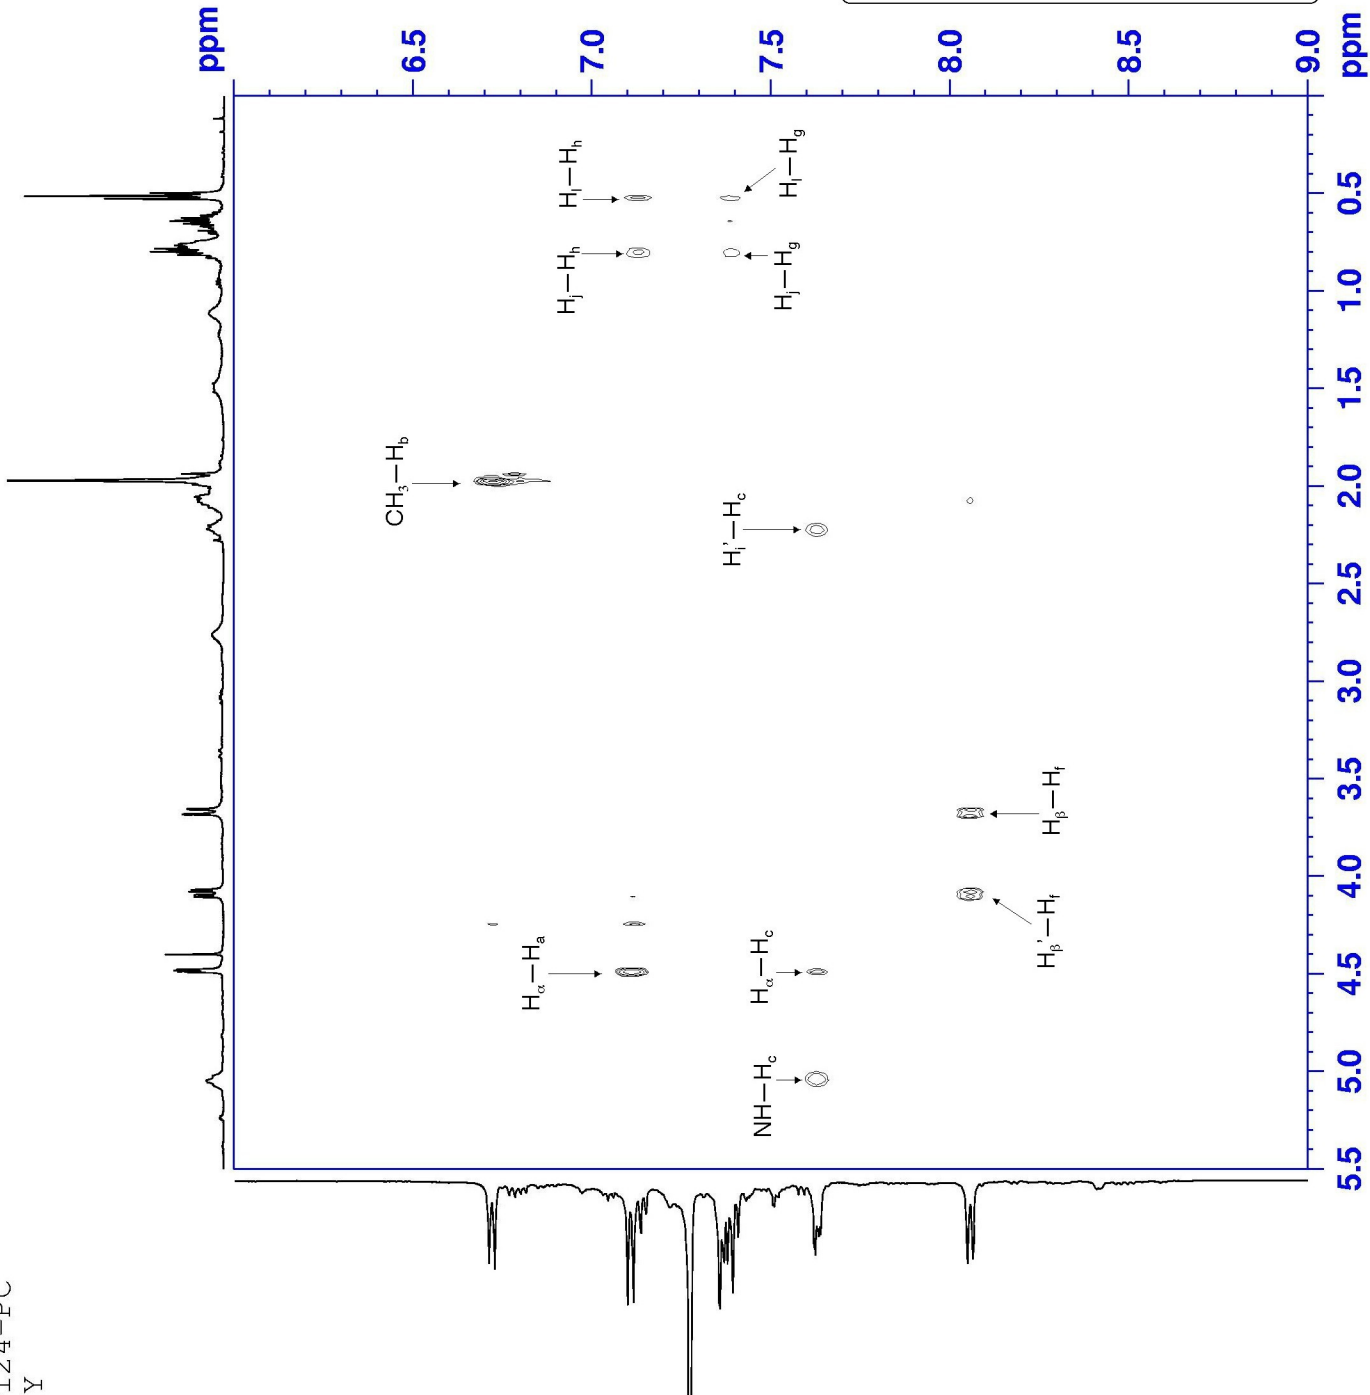

Current Data Parameters  
 NAME 11C-124-PC  
 EXPNO 3  
 PROCNO 1

F2 - Acquisition Parameters  
 Date\_ 20020806  
 Time 20.35  
 INSTRUM DRX500  
 PROBHD 5 mm Multinu  
 PULPROG noesytp  
 TD 2048  
 SOLVENT C6D6  
 NS 16  
 DS 4  
 SWH 5681.818 Hz  
 FIDRES 2.774325 Hz  
 AQ 0.1802740 sec  
 RG 181  
 DW 88.000 usec  
 DE 6.00 usec  
 TE 300.0 K  
 d0 0.00000300 sec  
 D1 2.00000000 sec  
 P1 9.30 usec  
 SFO1 500.1321210 MHz  
 NUC1 1H  
 PL1 -6.00 dB  
 D8 2.00000000 sec  
 INO 0.00008800 sec

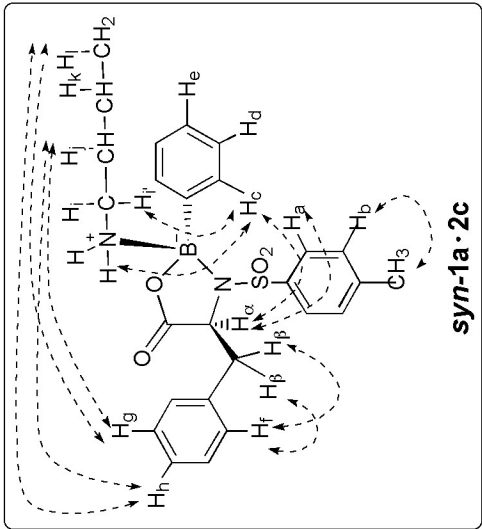

11C-124-PC  
NOESY

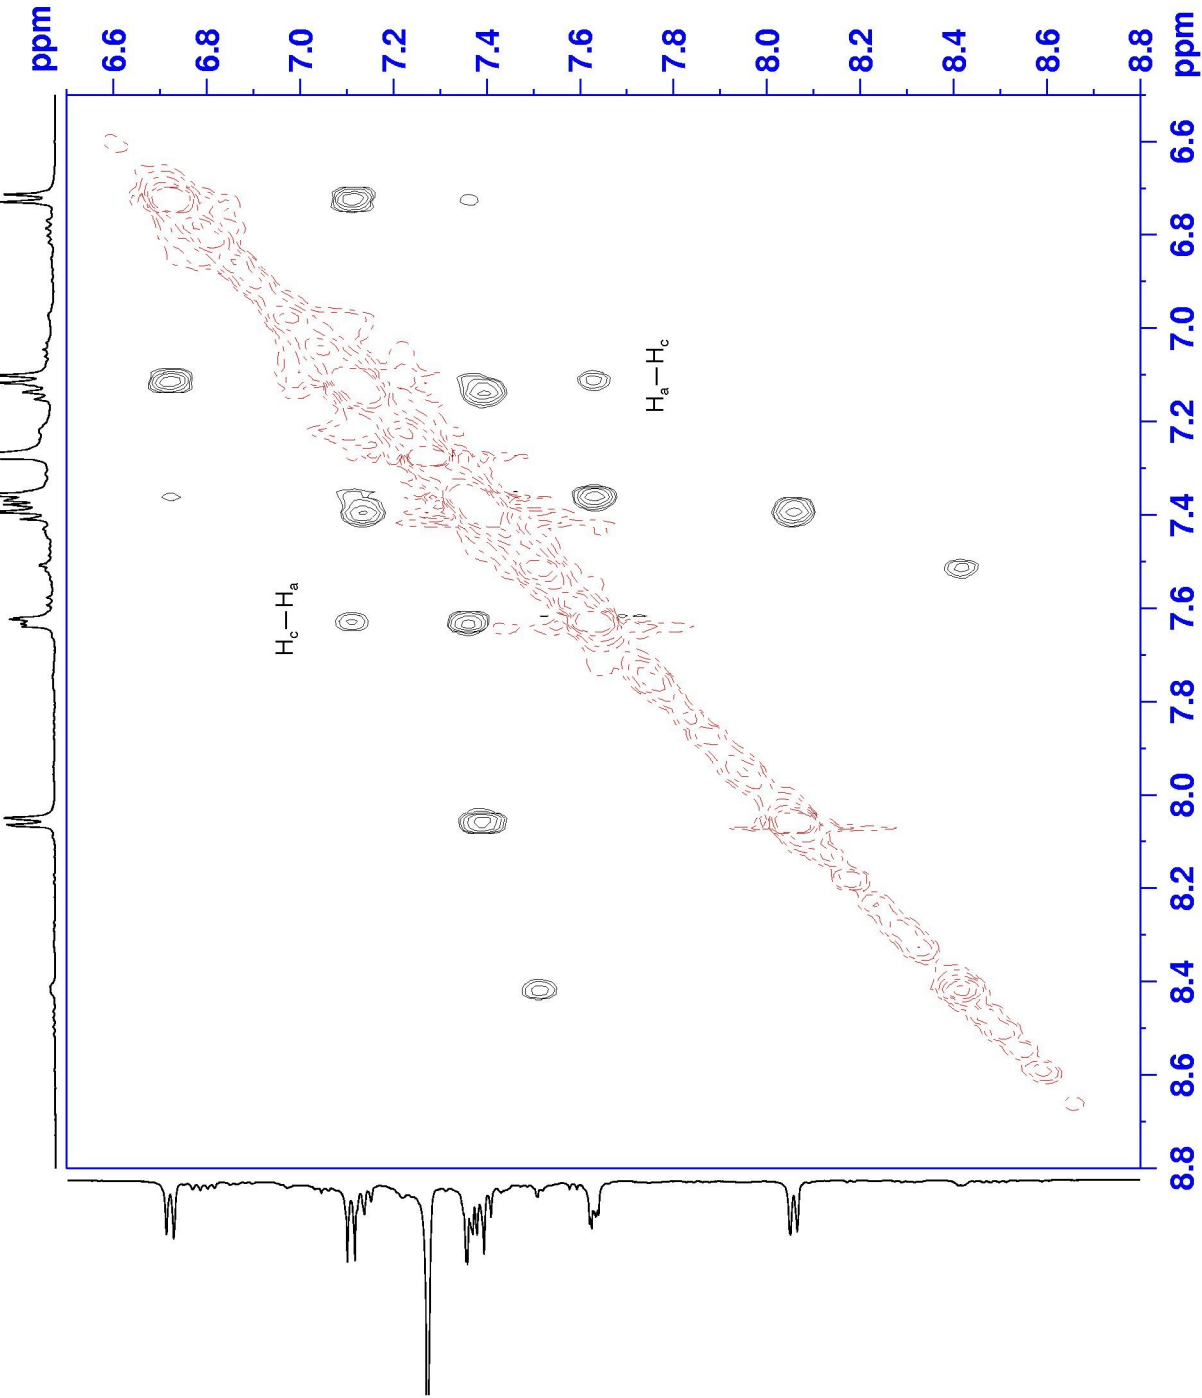

Current Data Parameters  
 NAME 11C-124-PC  
 EXPNO 3  
 PROCNO 1  
 F2 - Acquisition Parameters  
 Date\_ 20020806  
 Time 20.35  
 INSTRUM DRX500  
 PROBHD 5 mm Multinu  
 PULPROG noesytp  
 TD 2048  
 SOLVENT C6D6  
 NS 16  
 DS 4  
 SWH 5681.818 Hz  
 FIDRES 2.774325 Hz  
 AQ 0.1802740 sec  
 RG 181  
 DW 88.000 usec  
 DE 6.00 usec  
 TE 300.0 K  
 d0 0.00000300 sec  
 D1 2.00000000 sec  
 P1 9.30 usec  
 SFO1 500.1321210 MHz  
 NUC1 1H  
 PL1 -6.00 dB  
 D8 2.00000000 sec  
 INO 0.00008800 sec

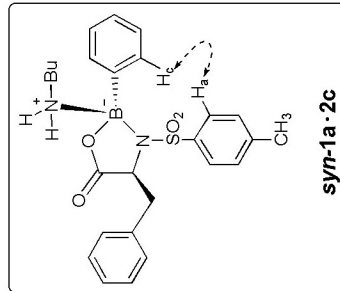

Supplement: b413370f-4.pdf [file b413370f-4.pdf]
