# Supplementary material for: High facial selectivity observed in amine coordination to chiral oxazaborolidinones
Source: Royal Society of Chemistry journal article supplement (doi:10.1039/b413370f), 2004-12-16

Current Data Parameters  
 NAME 11C-145-PA  
 EXPNO 1  
 PROCNO 1

F2 - Acquisition Parameter  
 Date\_ 20021023  
 Time\_ 16.52  
 INSTRUM DRX500  
 PROBRD 5 mm NUTINO  
 PULPROG zg30  
 TD 32768  
 SOLVENT CDCl3  
 NS 16  
 DS 2  
 SWH 10330.578 Hz  
 FIDRES 0.316264 Hz  
 AQ 1.5860212 sec  
 RG 256  
 DM 48.400 us  
 DE 6.00 us  
 TE 300.0 K  
 D1 1.00000000 sec  
 P1 9.30 us  
 SF01 500.1330886 MHz  
 NUC1 1H  
 PL1 -6.00 dB

F2 - Processing parameters  
 SI 16384  
 SF 500.1300000 MHz  
 MDW EN  
 SSB 0  
 LB 0.30 Hz  
 GB 0  
 PC 1.00

1D NMR plot parameters  
 CX 25.00 cm  
 F1P 9.512 pp  
 F1 4757.33 Hz  
 F2P 0.512 pp  
 F2 256.16 Hz  
 PRMCH 0.36000 pp  
 HZCN 180.04680 Hz

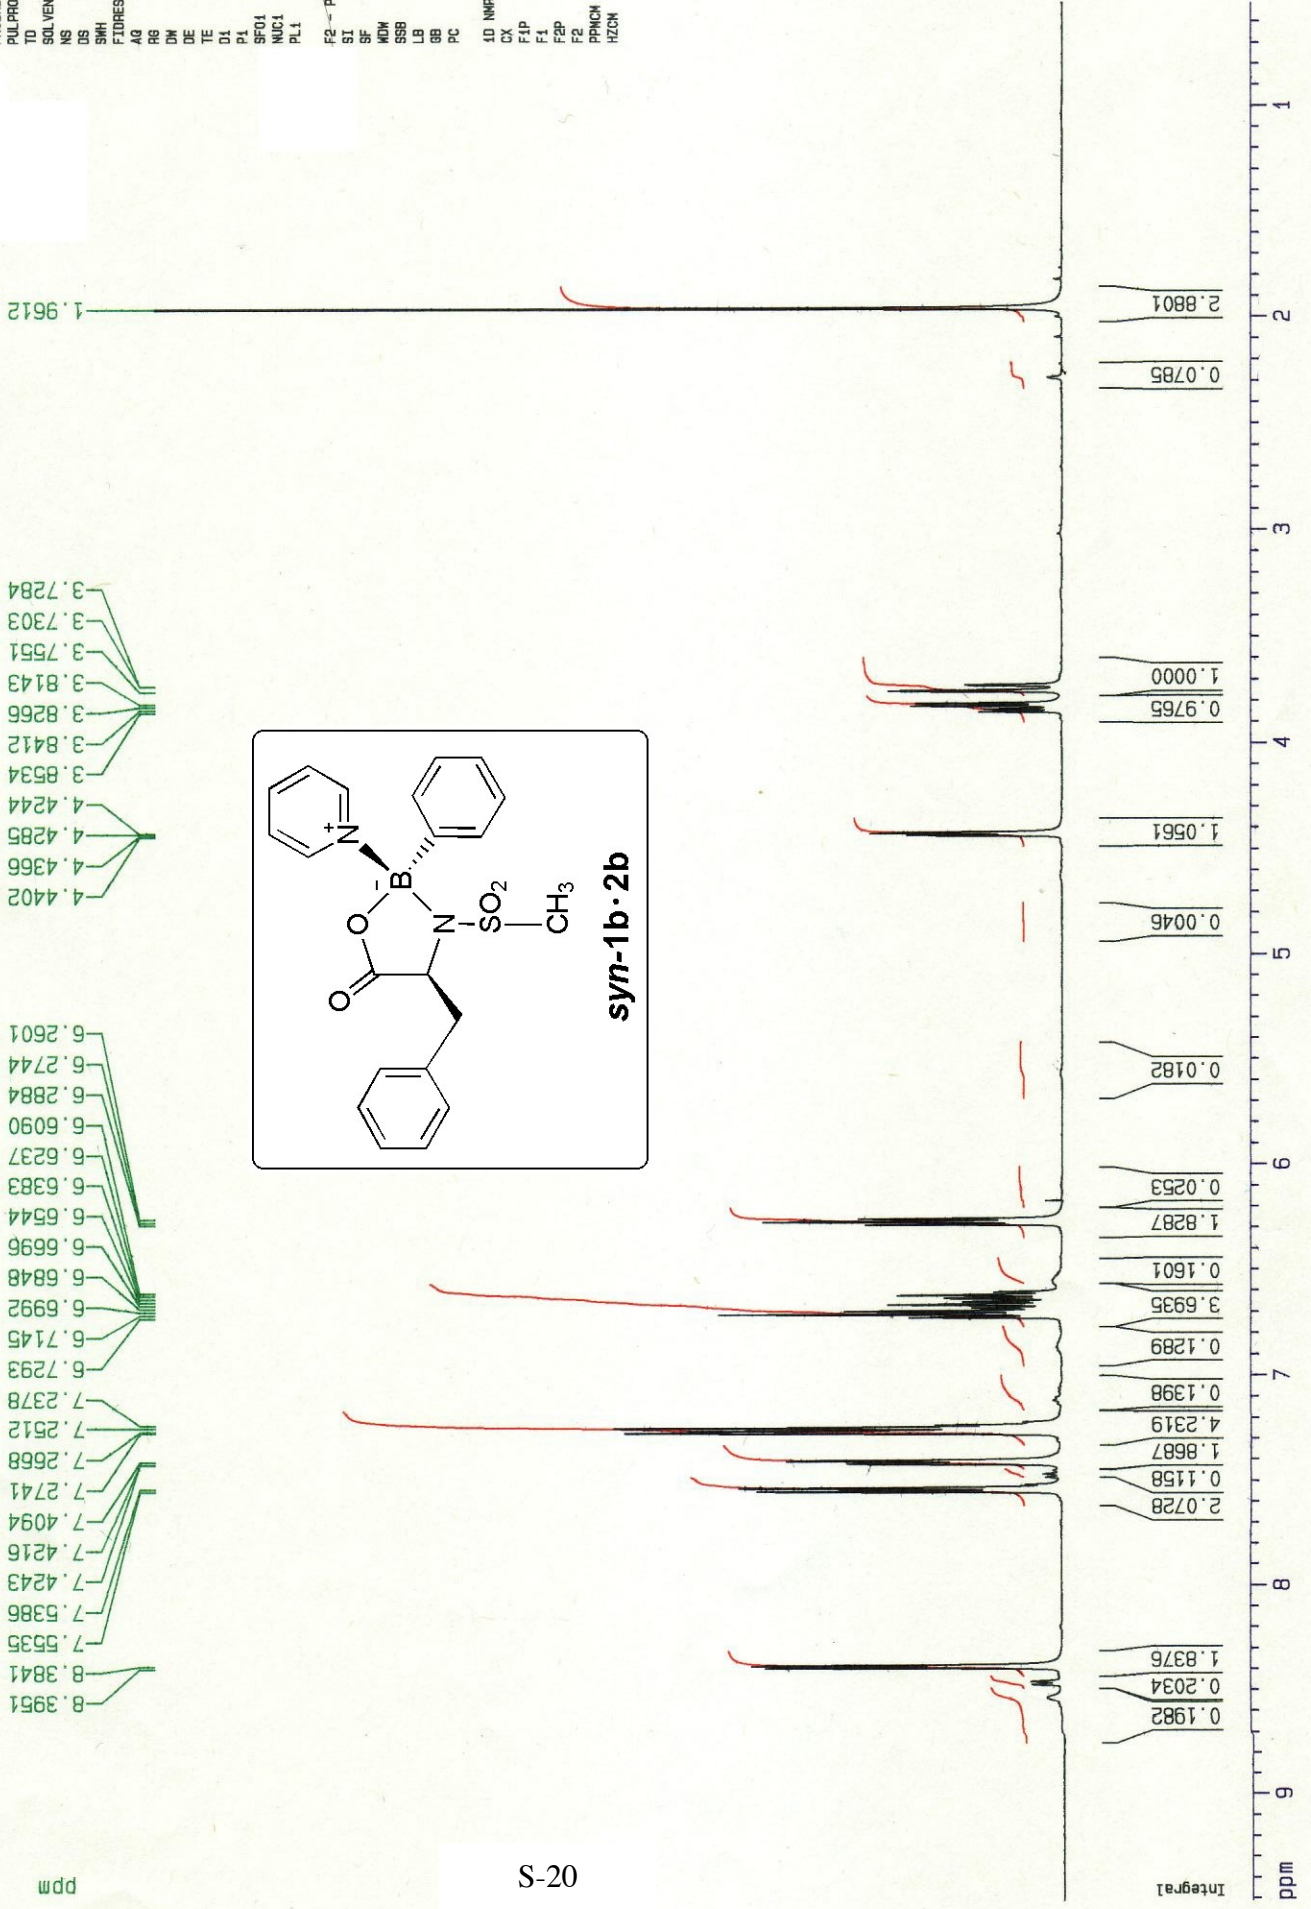

Current Data Parameters  
 NAME 11C-145-PB  
 EXPNO 5  
 PROCNO 1

F2 - Acquisition Parameters  
 Date\_ 20030115  
 Time 21.55  
 INSTRUM DRX500  
 PROBHD 5 mm Multinu  
 PULPROG noesytp  
 TD 2048  
 SOLVENT C6D6  
 NS 16  
 DS 4  
 SWH 5681.818 Hz  
 FIDRES 2.774325 Hz  
 AQ 0.1802740 sec  
 RG 256  
 DW 88.000 usec  
 DE 6.00 usec  
 TE 300.0 K  
 d0 0.00000300 sec  
 D1 2.00000000 sec  
 P1 9.30 usec  
 SFO1 500.1324432 MHz  
 NUC1 1H  
 PL1 -6.00 dB  
 D8 2.00000000 sec  
 IN0 0.00008800 sec

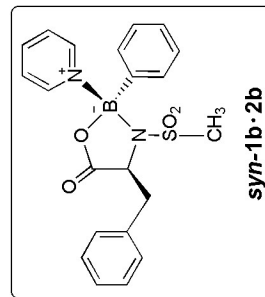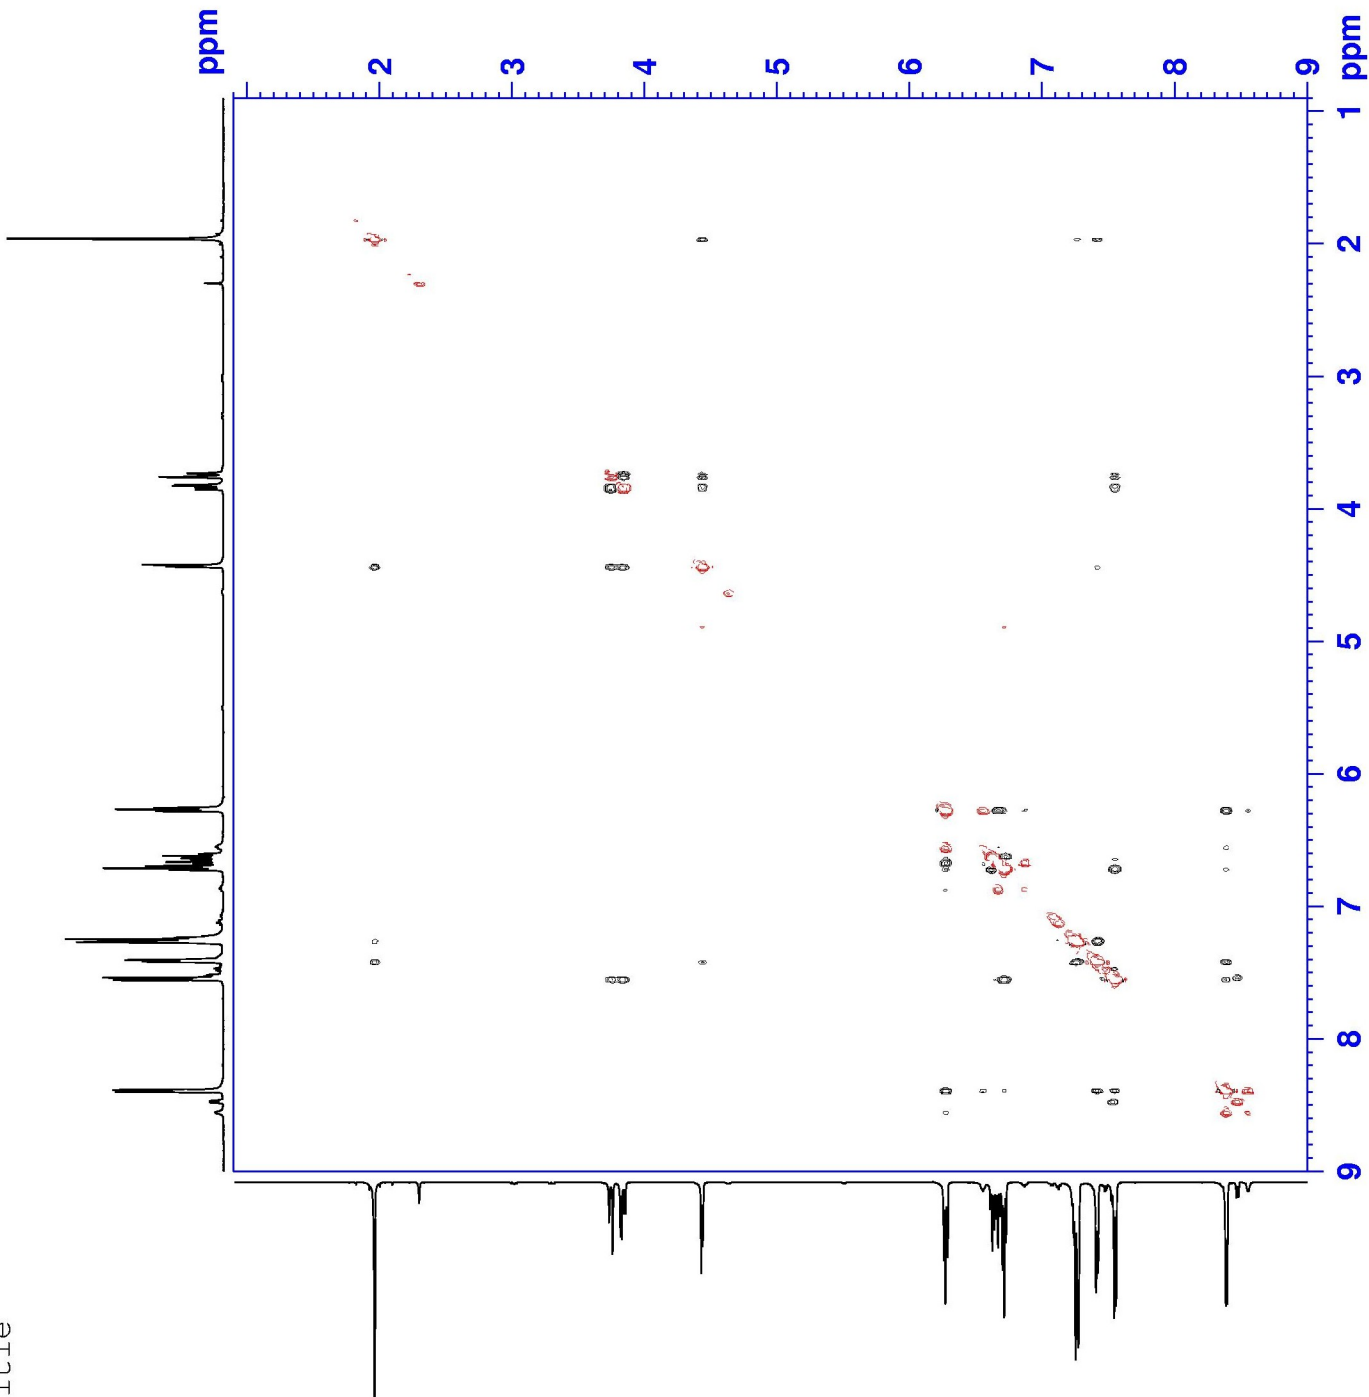

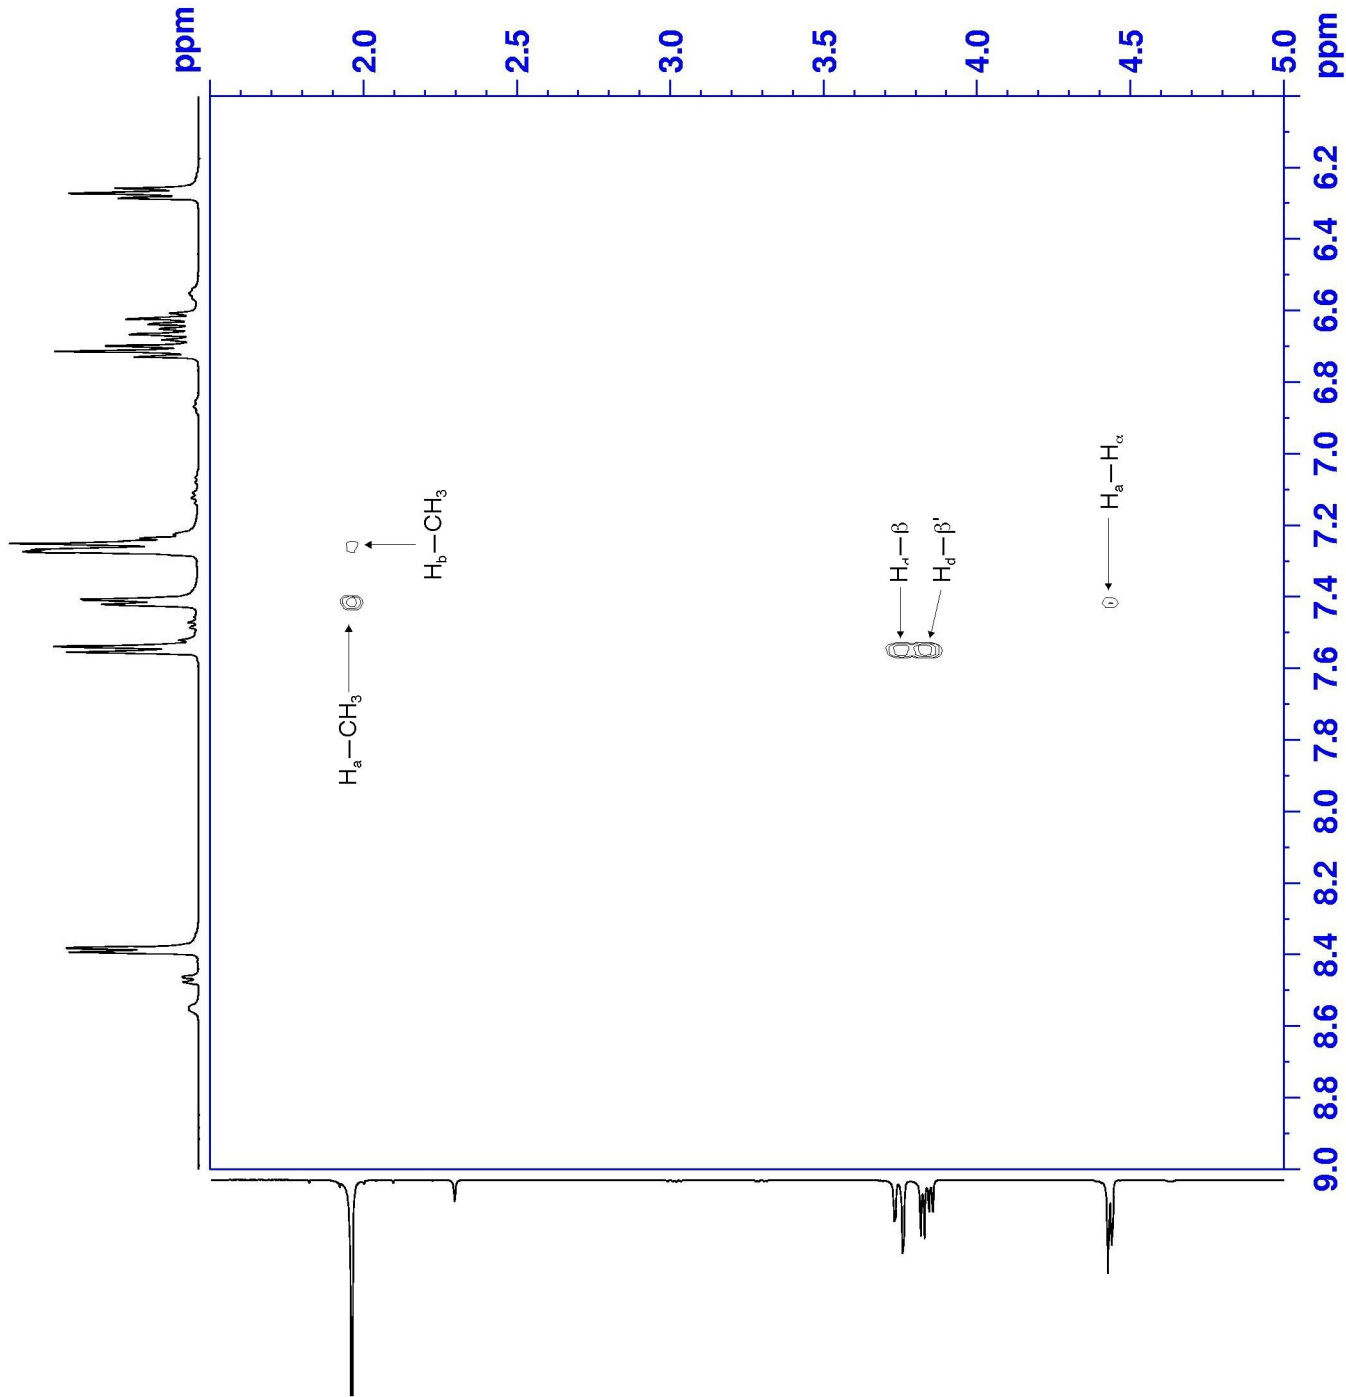

Current Data Parameters  
 NAME 11C-145-PB  
 EXPNO 5  
 PROCNO 1

F2 - Acquisition Parameters  
 Date\_ 20030115  
 Time 21.55  
 INSTRUM DRX500  
 PROBEHD 5 mm Multinu  
 PULPROG noesytp  
 TD 2048  
 SOLVENT C6D6  
 NS 16  
 DS 4  
 SWH 5681.818 Hz  
 FIDRES 2.774325 Hz  
 AQ 0.1802740 sec  
 RG 256  
 DW 88.000 usec  
 DE 6.00 usec  
 TE 300.0 K  
 d0 0.00000300 sec  
 D1 2.00000000 sec  
 P1 9.30 usec  
 SF01 500.1324432 MHz  
 NUC1 1H  
 PL1 -6.00 dB  
 D8 2.00000000 sec  
 IN0 0.00008800 sec

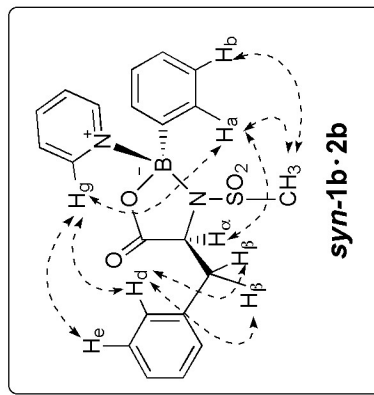

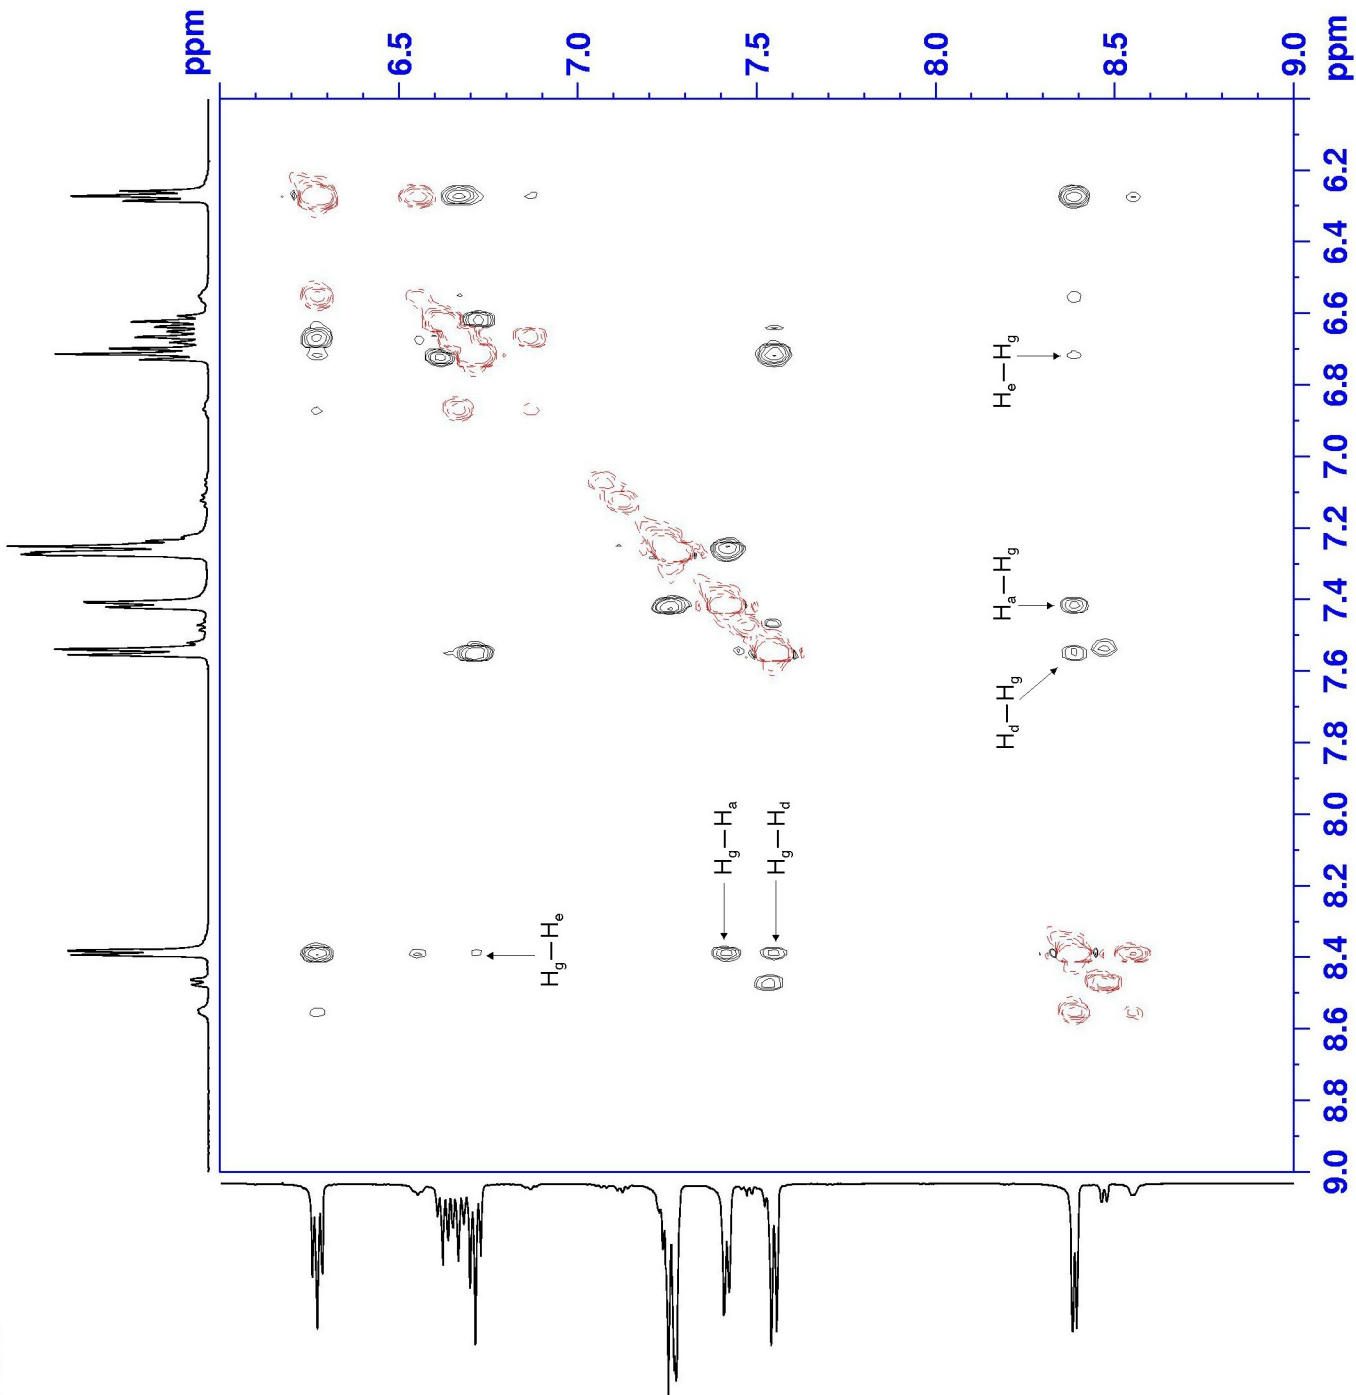

Current Data Parameters  
 NAME 11C-145-PB  
 EXPNO 5  
 PROCNO 1

F2 - Acquisition Parameters  
 Date\_ 20030115  
 Time 21.55  
 INSTRUM DRX500  
 PROBHD 5 mm Multinu  
 PULPROG noesygp  
 TD 2048  
 ID C6D6  
 NS 16  
 DS 4  
 SWH 5681.818 Hz  
 FIDRES 2.774325 Hz  
 AQ 0.11802740 sec  
 RG 256  
 DW 88.000 usec  
 DE 6.00 usec  
 TE 300.0 K  
 G0 0.00000300 sec  
 D1 2.00000000 sec  
 P1 9.30 usec  
 SFO1 500.1324432 MHz  
 NUC1 1H  
 PL1 -6.00 dB  
 D8 2.00000000 sec  
 INO 0.00008800 sec

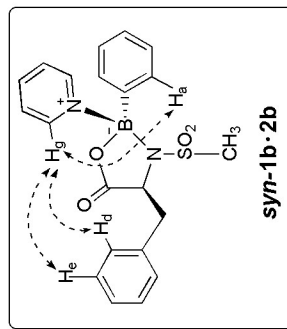

Supplement: b413370f-5.pdf [file b413370f-5.pdf]
