# Supplementary material for: High facial selectivity observed in amine coordination to chiral oxazaborolidinones
Source: Royal Society of Chemistry journal article supplement (doi:10.1039/b413370f), 2004-12-16

Current Data Parameters  
 NAME 11C-146-PA  
 EXPNO 1  
 PROCNO 1

F2 - Acquisition Parameter

Date\_ 20021024  
 Time 17.36  
 INSTRUM DRX500  
 PULPROG zg30  
 TD 32768  
 SOLVENT CDCl3  
 NS 16  
 DS 2  
 SWH 10330.578 Hz  
 FIDRES 0.316264 Hz  
 AQ 1.5882342 sec  
 RG 203.2  
 DM 48.400 us  
 DE 6.00 us  
 TE 300.0 K  
 D1 1.00000000 sec  
 P1 9.30 us  
 RF01 500.1330885 MHz  
 NUC1 1H  
 PL1 -6.00 dB

F2 - Processing parameters  
 SI 16384  
 SF 500.1300000 MHz  
 MDW 0  
 SSB 0  
 LB 0.30 Hz  
 GB 0  
 PC 1.00

1D NMR plot parameters  
 CX 25.00 cm  
 F1P 9.231 pp  
 F1 4616.90 Hz  
 F2P 0.231 pp  
 F2 115.73 Hz  
 PRMCH 0.36000 pp  
 HZCN 160.04680 Hz

1.9980  
 2.0115  
 2.0181

4.4406  
 4.6383  
 5.8616  
 5.8769  
 5.8920  
 5.9613  
 5.9745  
 5.9889  
 6.7280  
 6.7441  
 6.8370  
 6.8508  
 7.1462  
 7.1616  
 7.1769  
 7.1938  
 7.2204  
 7.2430  
 7.2552  
 7.2582  
 7.2734  
 7.3069  
 7.3195  
 7.3361  
 7.5433  
 7.5595  
 7.7832  
 7.7853  
 8.1456  
 8.8012  
 8.8120

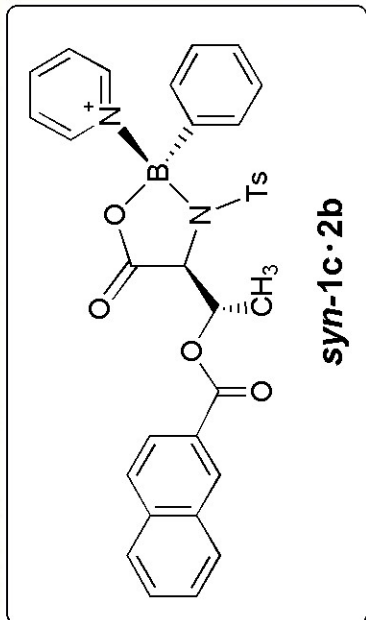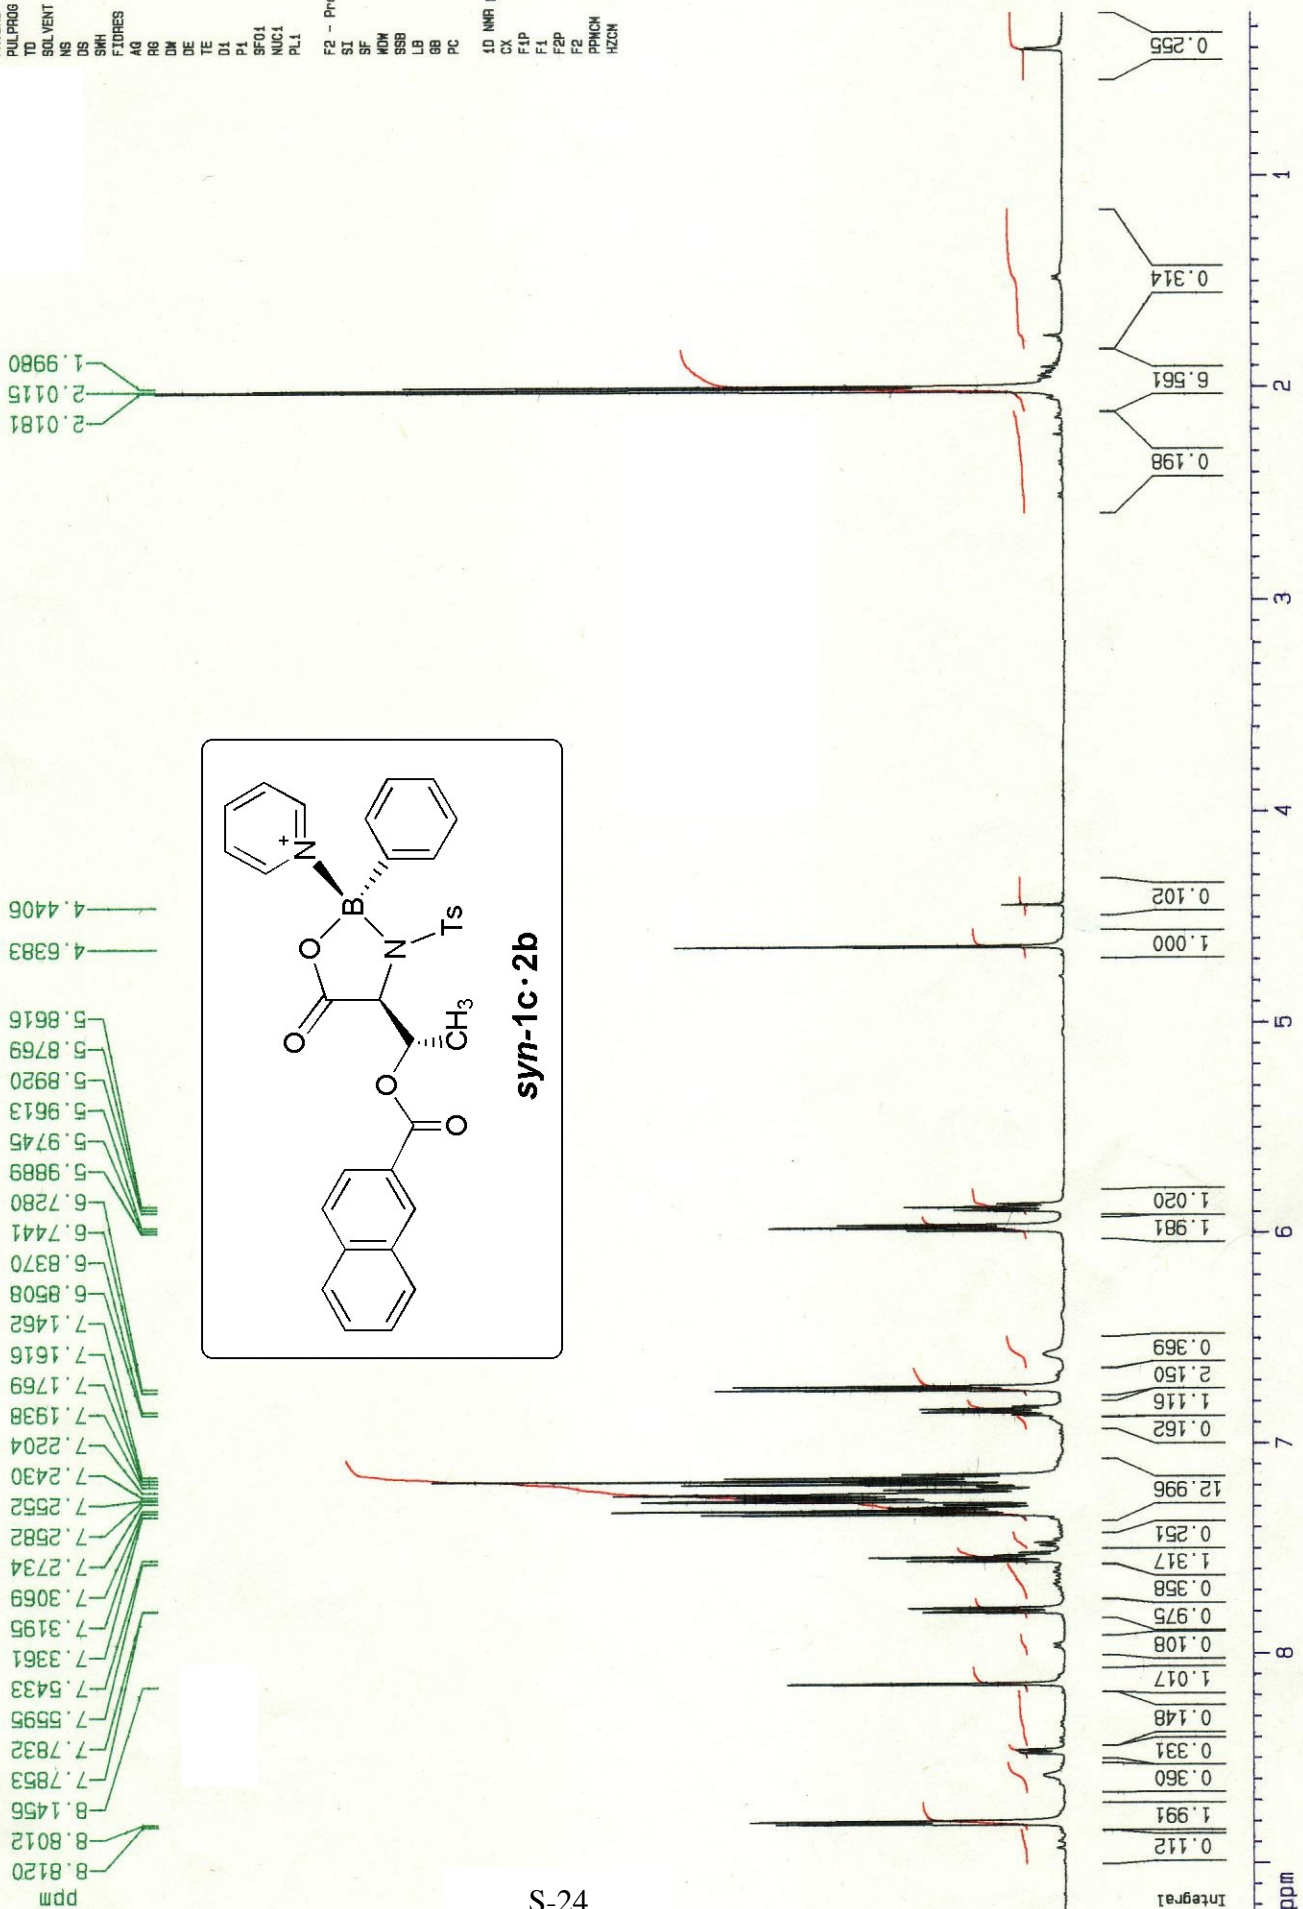

Current Data Parameters  
 NAME 11C-146-PB  
 EXPNO 4  
 PROCNO 1

F2 - Acquisition Parameters  
 Date\_ 20021028  
 Time 20.55  
 INSTRUM DRX500  
 PROBHD 5 mm Multinu  
 PULPROG noesytp  
 TD 2048  
 SOLVENT C6D6  
 NS 16  
 DS 4  
 SWH 5952.381 Hz  
 FIDRES 2.906436 Hz  
 AQ 0.1720820 sec  
 RG 114  
 DW 84.000 usec  
 DE 6.00 usec  
 TE 300.0 K  
 d0 0.0000300 sec  
 D1 2.00819206 sec  
 P1 9.30 usec  
 SFOL 500.1323183 MHz  
 NUC1 1H  
 PL1 -6.00 dB  
 D8 2.00000000 sec  
 IN0 0.00008400 sec

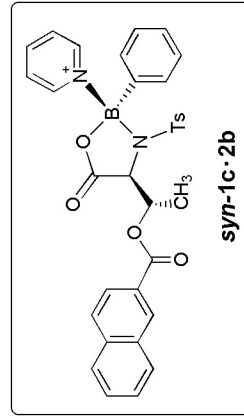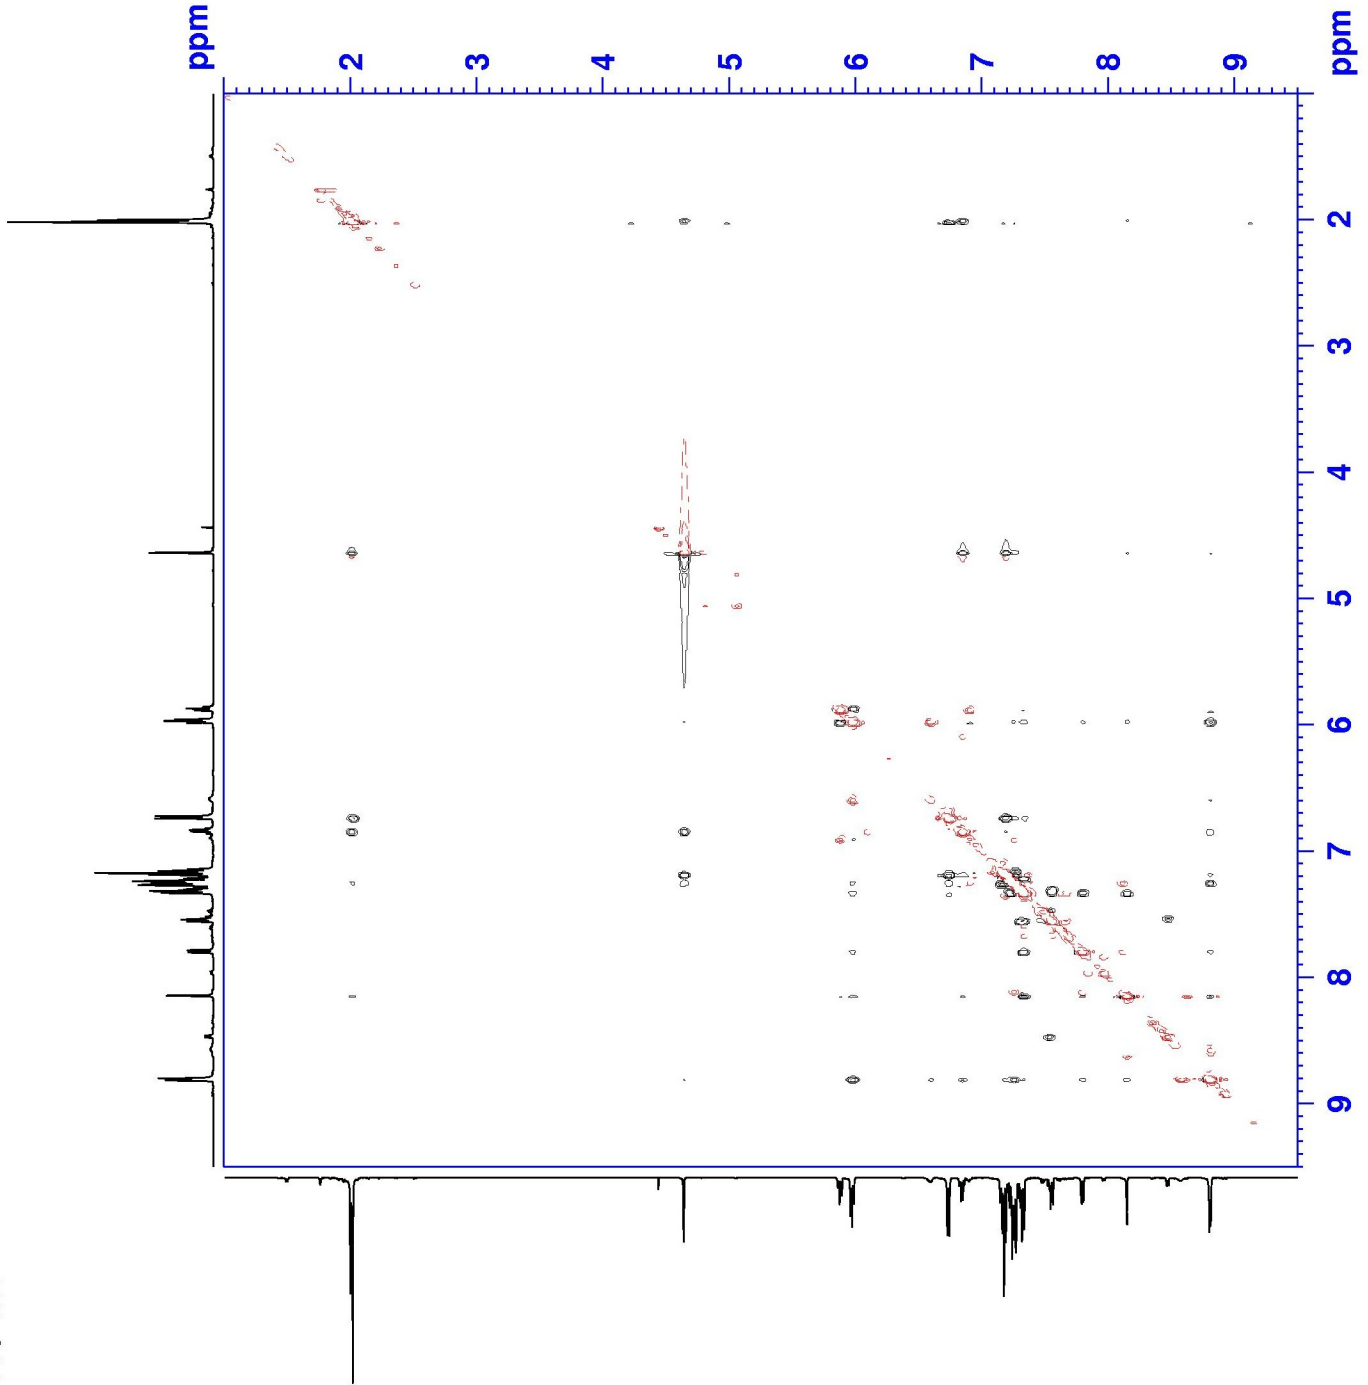

Current Data Parameters  
 NAME 11C-146-PB  
 EXPNO 4  
 PROCNO 1

F2 - Acquisition Parameters  
 Date\_ 20021028  
 Time 20.55  
 INSTRUM DRX500  
 PROBHD 5 mm Multinu  
 PULPROG noesytp  
 TD 2048  
 SOLVENT C6D6  
 NS 16  
 DS 4  
 SWH 5952.381 Hz  
 FIDRES 2.906436 Hz  
 AQ 0.1720820 sec  
 RG 114  
 DW 84.000 usec  
 DE 6.00 usec  
 TE 300.0 K  
 d0 0.00000300 sec  
 D1 2.00819206 sec  
 P1 9.30 usec  
 SFO1 500.1323183 MHz  
 NUC1 1H  
 PL1 -6.00 dB  
 D8 2.00000000 sec  
 IN0 0.00008400 sec

ppm 2.0 2.5 3.0 3.5 4.0 4.5 5.0 5.5 6.0 6.5 7.0 ppm

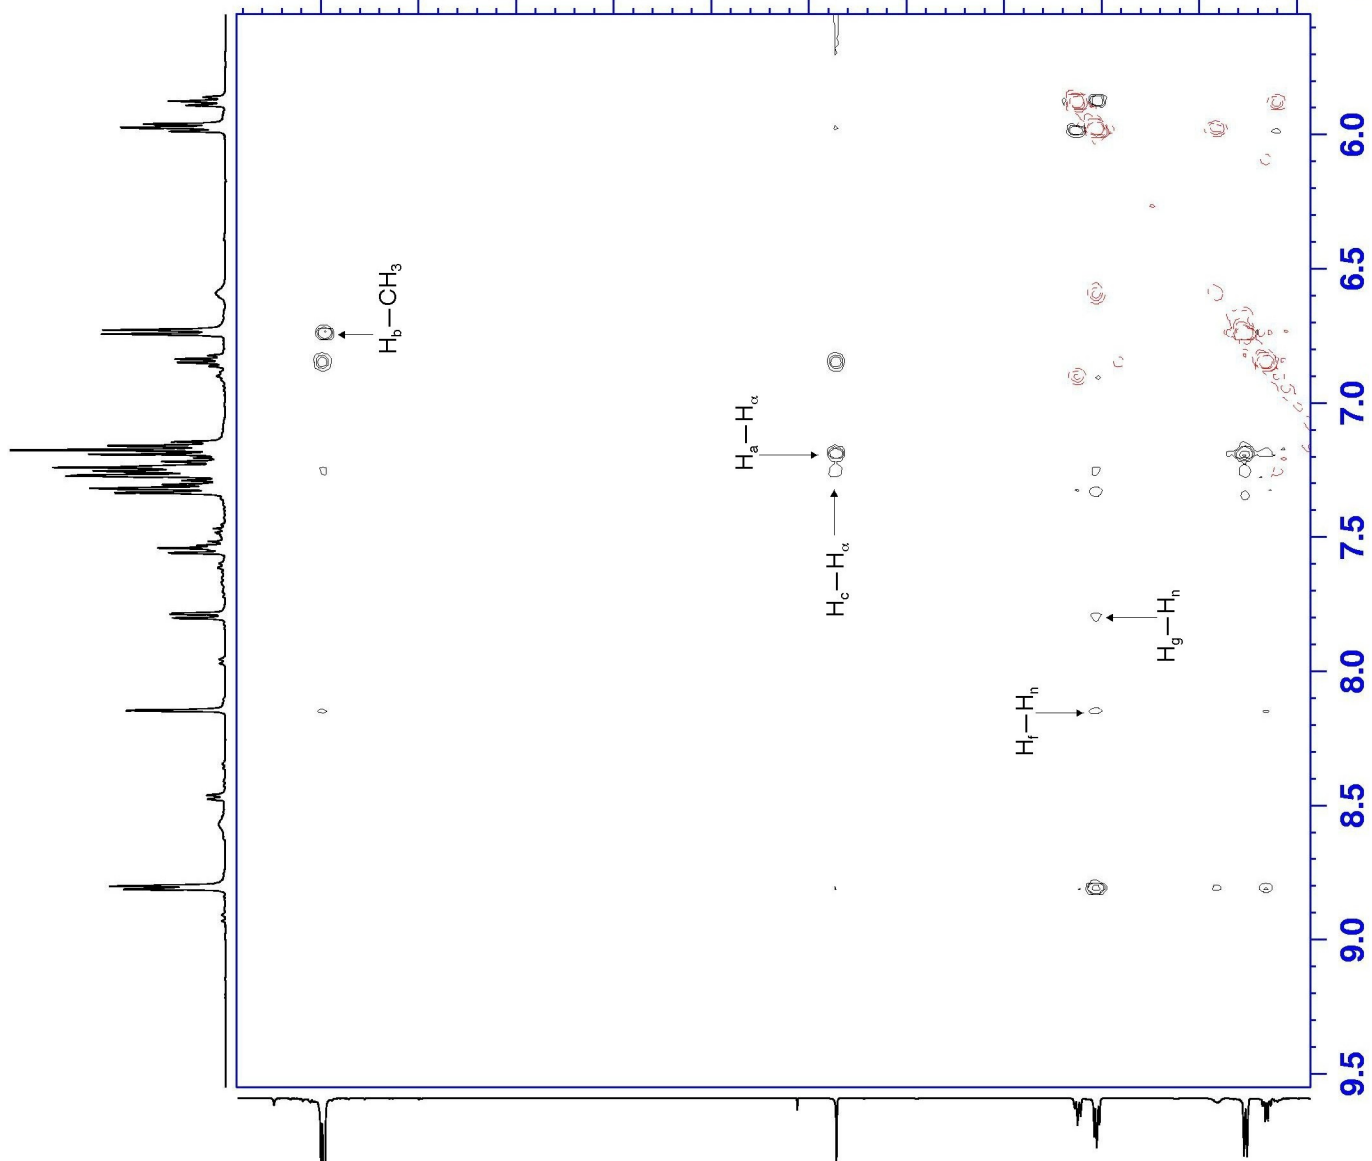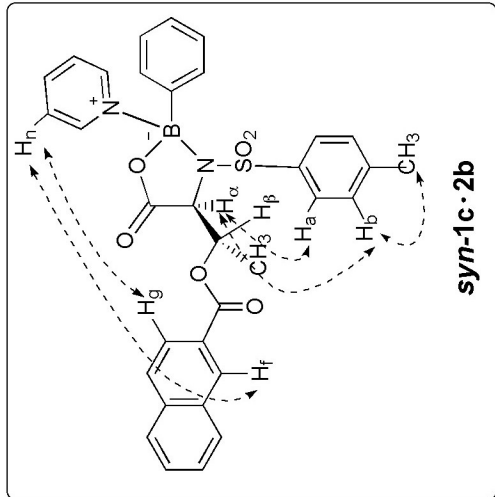

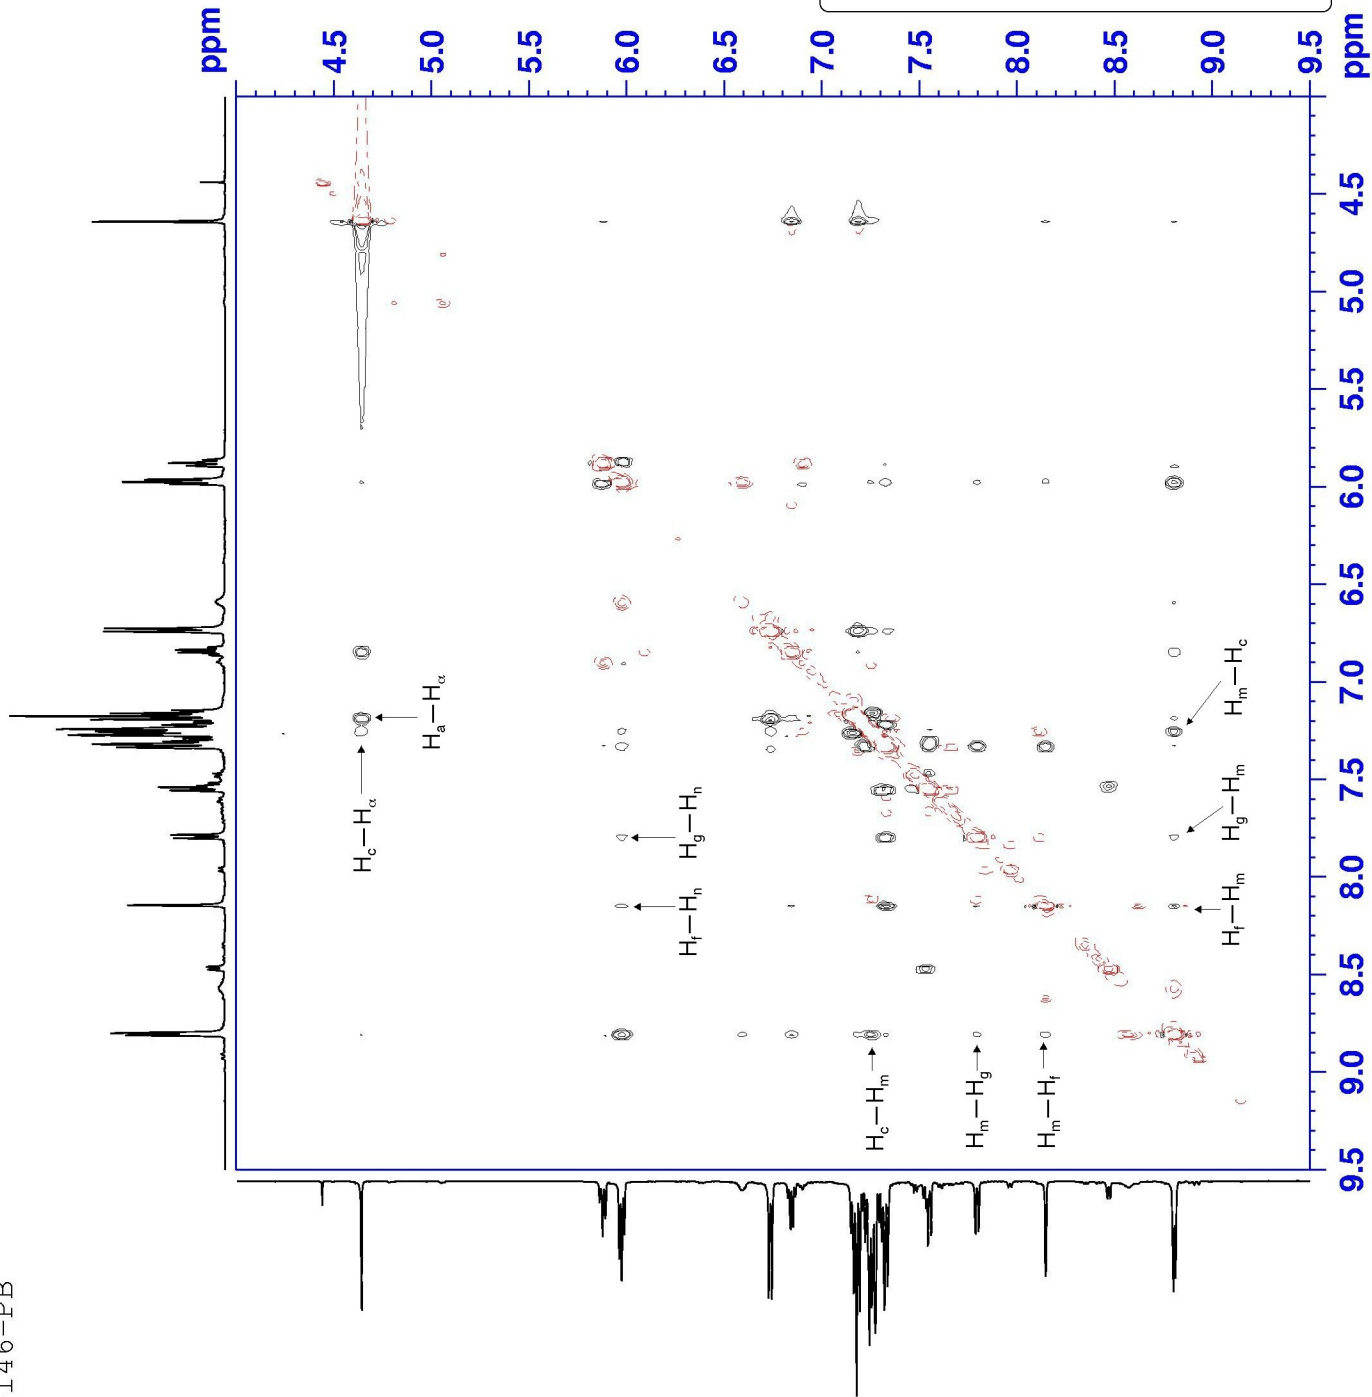

Current Data Parameters  
 NAME 11C-146-PB  
 EXPNO 4  
 PROCNO 1

F2 - Acquisition Parameters

Date\_ 20021028  
 Time 20.55  
 INSTRUM DRX500  
 PROBHD 5 mm Multinu  
 PULPROG noesytp  
 TD 2048  
 SOLVENT C6D6  
 NS 16  
 DS 4  
 SWH 5952.381 Hz  
 FIDRES 2.906436 Hz  
 AQ 0.1720820 sec  
 RG 114  
 DW 84.000 usec  
 DE 6.00 usec  
 TE 300.0 K  
 d0 0.00000300 sec  
 D1 2.00819206 sec  
 P1 9.30 usec  
 SFO1 500.1323183 MHz  
 NUC1 1H  
 PL1 -6.00 dB  
 D8 2.00000000 sec  
 IN0 0.00008400 sec

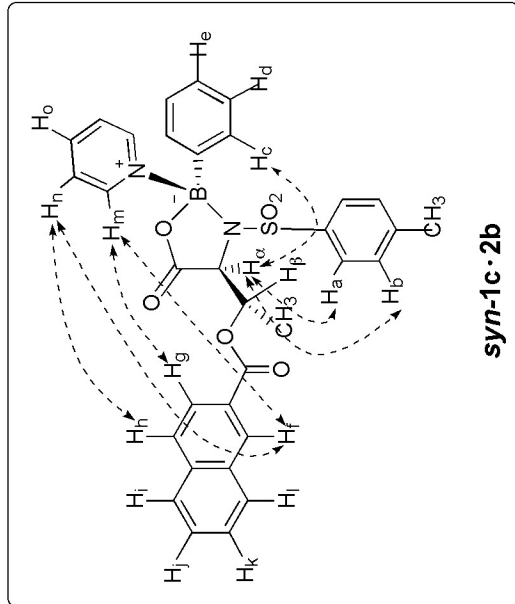

Supplement: b413370f-6.pdf [file b413370f-6.pdf]
