# Supplementary material for: High facial selectivity observed in amine coordination to chiral oxazaborolidinones
Source: Royal Society of Chemistry journal article supplement (doi:10.1039/b413370f), 2004-12-16

Current Data Parameters  
 NAME 11C-189-PA  
 EXPNO 1  
 PROCNO 1

F2 - Acquisition Parameters

Date\_ 20030709  
 Time 18.29  
 INSTRUM dpv500  
 PROBHD 5 mm Multinucl  
 PULPROG zg30  
 TD 65536  
 SOLVENT CDCl3  
 NS 16  
 DS 2  
 SWH 10330.578 Hz  
 FIDRES 0.157632 Hz  
 AQ 3.1719923 sec  
 RG 181  
 DW 48.400 usec  
 DE 6.00 usec  
 TE 295.7 K  
 D1 1.0000000 sec  
 MCREST 0.0000000 sec  
 MCMRK 0.01500000 sec

===== CHANNEL f1 =====

NUC1 1H  
 P1 10.30 usec  
 PL1 -6.00 dB  
 SFO1 500.1330885 MHz

F2 - Processing parameters

SF 500.1300129 MHz  
 SI 32768  
 MDW 0  
 SSB 0  
 LB 0.30 Hz  
 GB 0  
 PC 1.00

1D NMR plot parameters

CX 24.00 cm  
 CY 0.00 cm  
 F1P 9.352 ppm  
 F1 4677.28 Hz  
 F2P 0.352 ppm  
 F2 176.11 Hz  
 PPMCM 0.37500 ppm/cm  
 HZCM 187.54875 Hz/cm

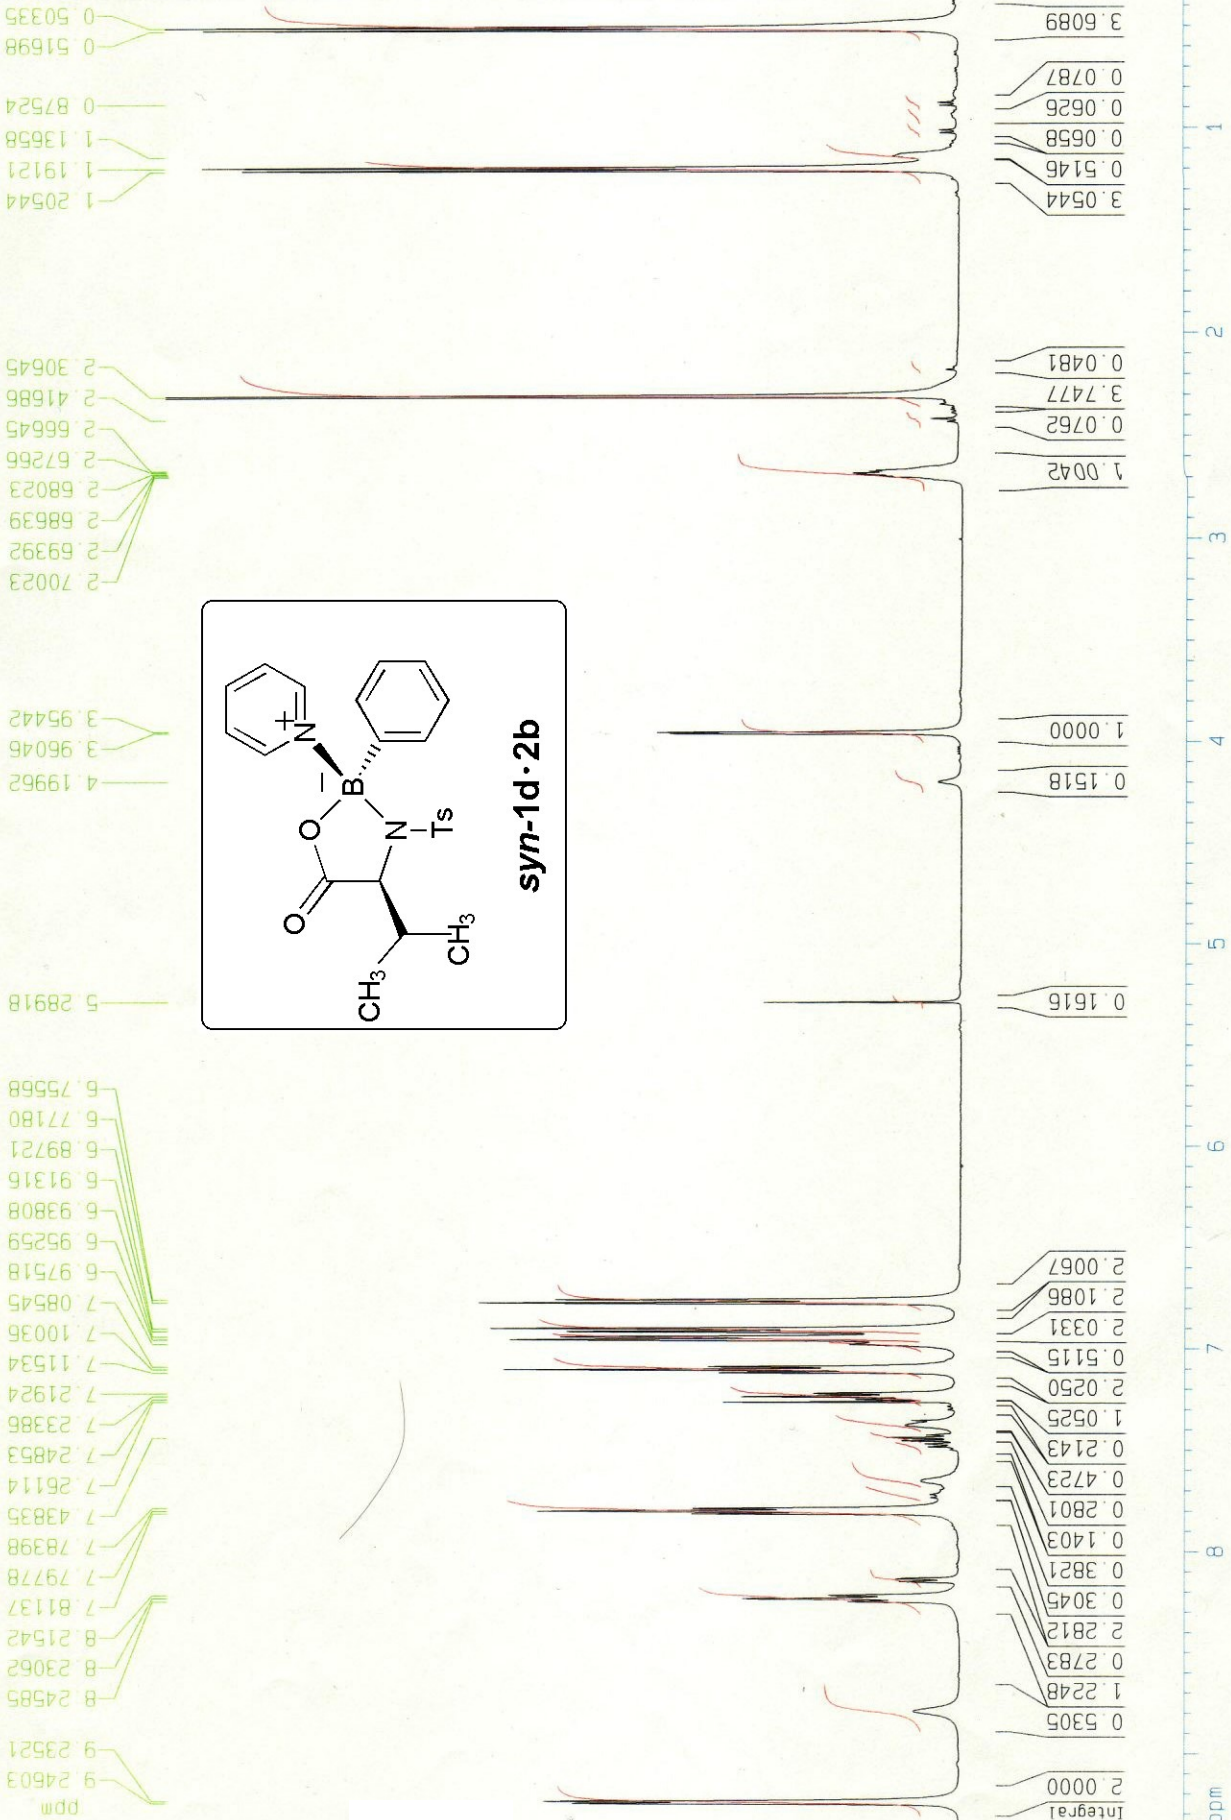

Current Data Parameters  
 NAME 11C-189-PB  
 EXPNO 5  
 PROCNO 1

F2 - Acquisition Parameters  
 Date\_ 20030710  
 Time 21.35  
 INSTRUM drx500  
 PROBHD 5 mm Multinucl  
 PULPROG noesyph  
 TD 2048  
 SOLVENT CDCl3  
 NS 16  
 DS 4  
 SWH 6067.961 Hz  
 FIDRES 2.962872 Hz  
 AQ 0.1688052 sec  
 RG 90.5  
 DW 82.400 usec  
 DE 6.00 usec  
 TE 295.8 K  
 d0 0.00006929 sec  
 D1 2.11223006 sec  
 D8 2.00000000 sec  
 INO 0.00016480 sec  
 MCREST 0.00000000 sec  
 MCWRK 1.05611503 sec  
 STCNT 128

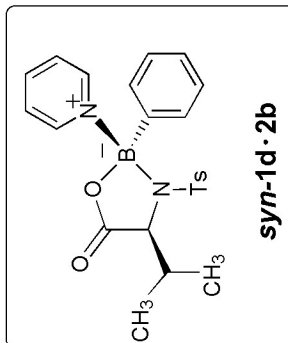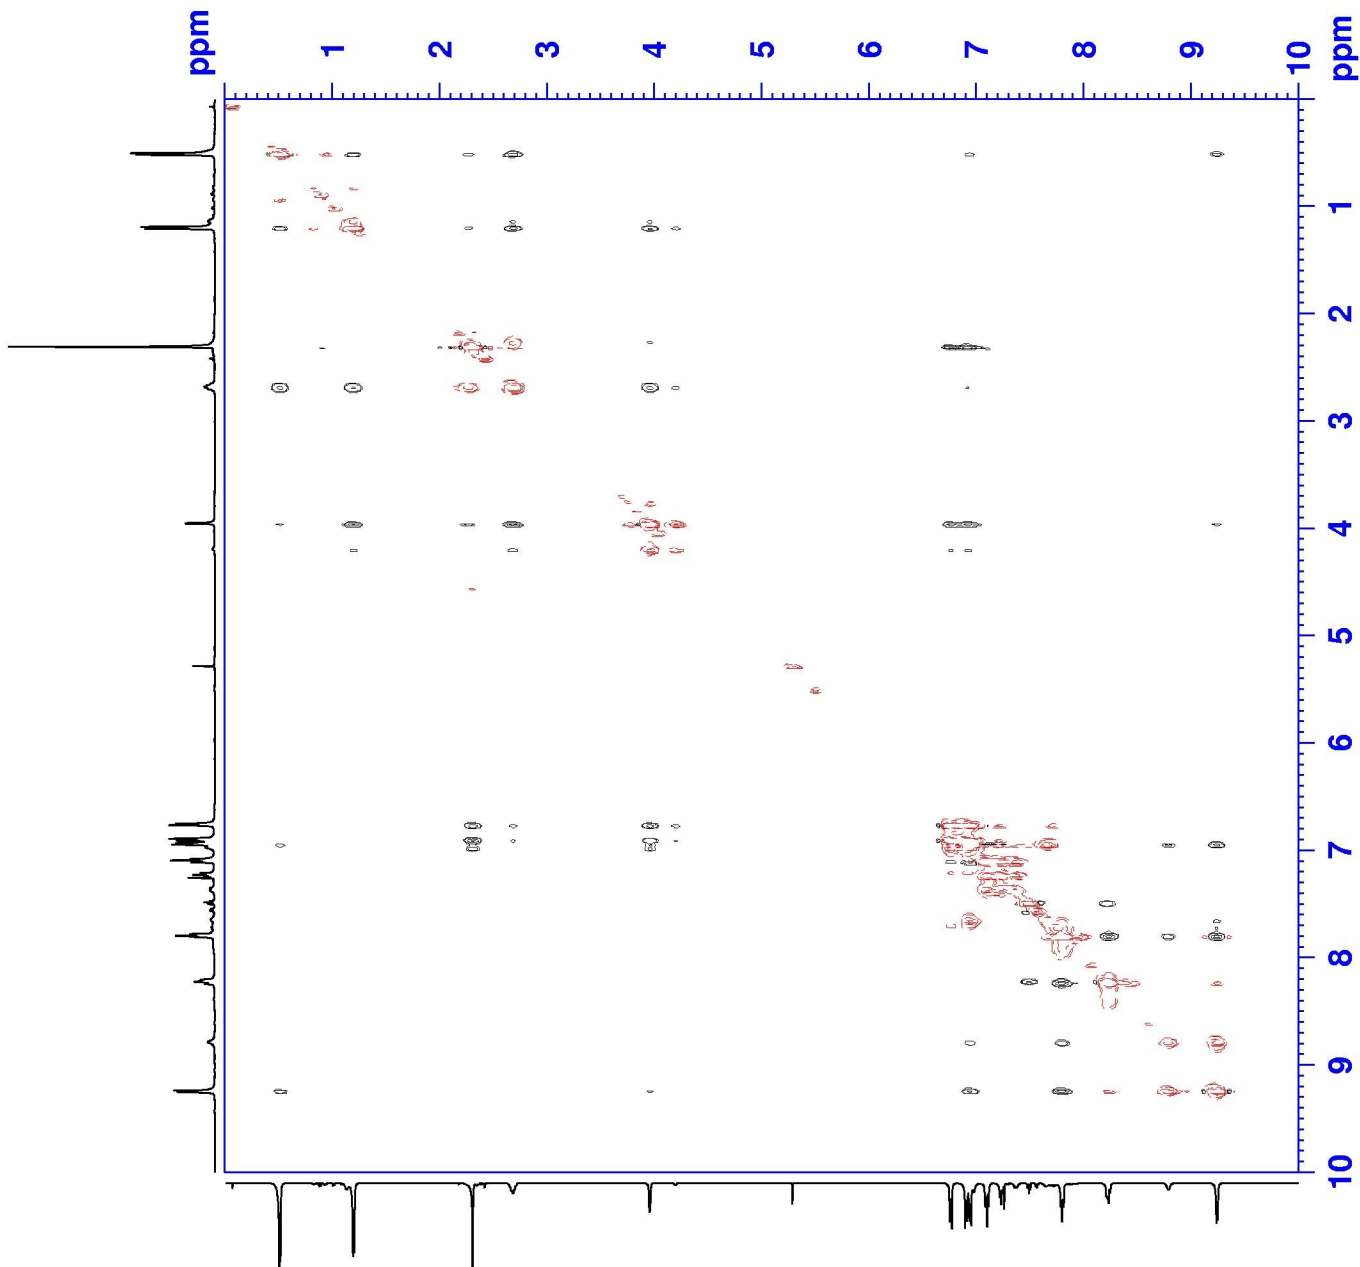

Current Data Parameters  
 NAME 11C-189-PB  
 EXPNO 5  
 PROCNO 1

F2 - Acquisition Parameters  
 Date\_ 20030710  
 Time 21.35  
 INSTRUM drx500  
 PROBHD 5 mm Multinucl  
 PULPROG noesyph  
 TD 2048  
 SOLVENT CDCl3  
 NS 16  
 DS 4  
 SWH 6067.961 Hz  
 FIDRES 2.962872 Hz  
 AQ 0.1688052 sec  
 RG 90.5  
 DW 82.400 usec  
 DE 6.00 usec  
 TE 295.8 K  
 d0 0.00006929 sec  
 D1 2.11223006 sec  
 D8 2.00000000 sec  
 INO 0.00016480 sec  
 MCREST 0.00000000 sec  
 MCWRK 1.05611503 sec  
 STCNT 128

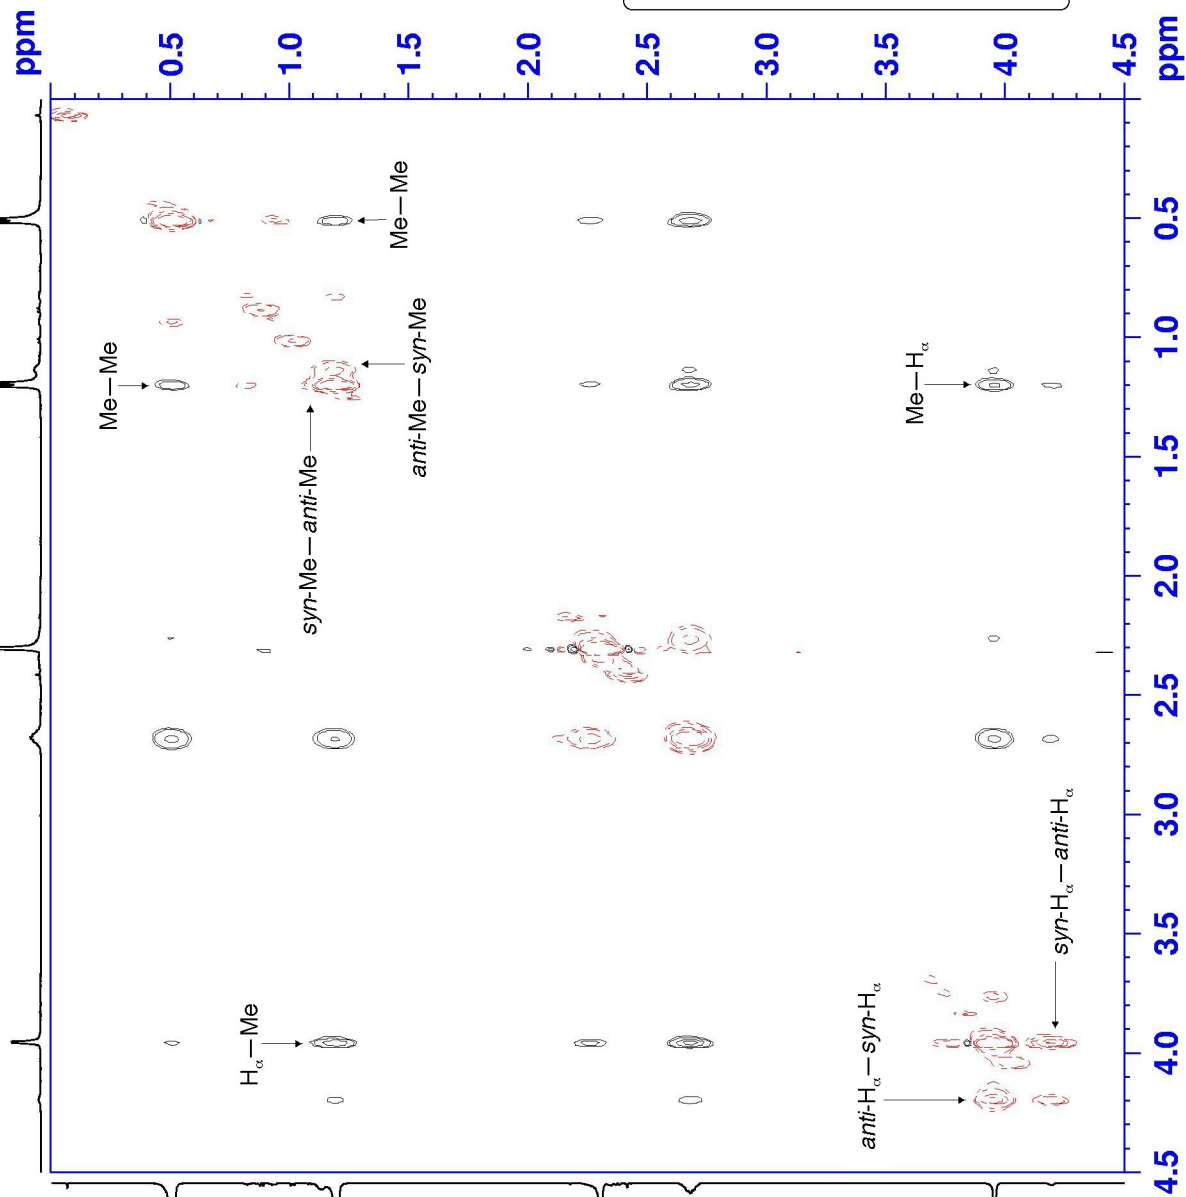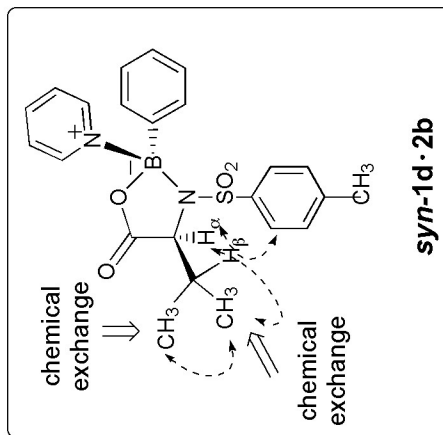

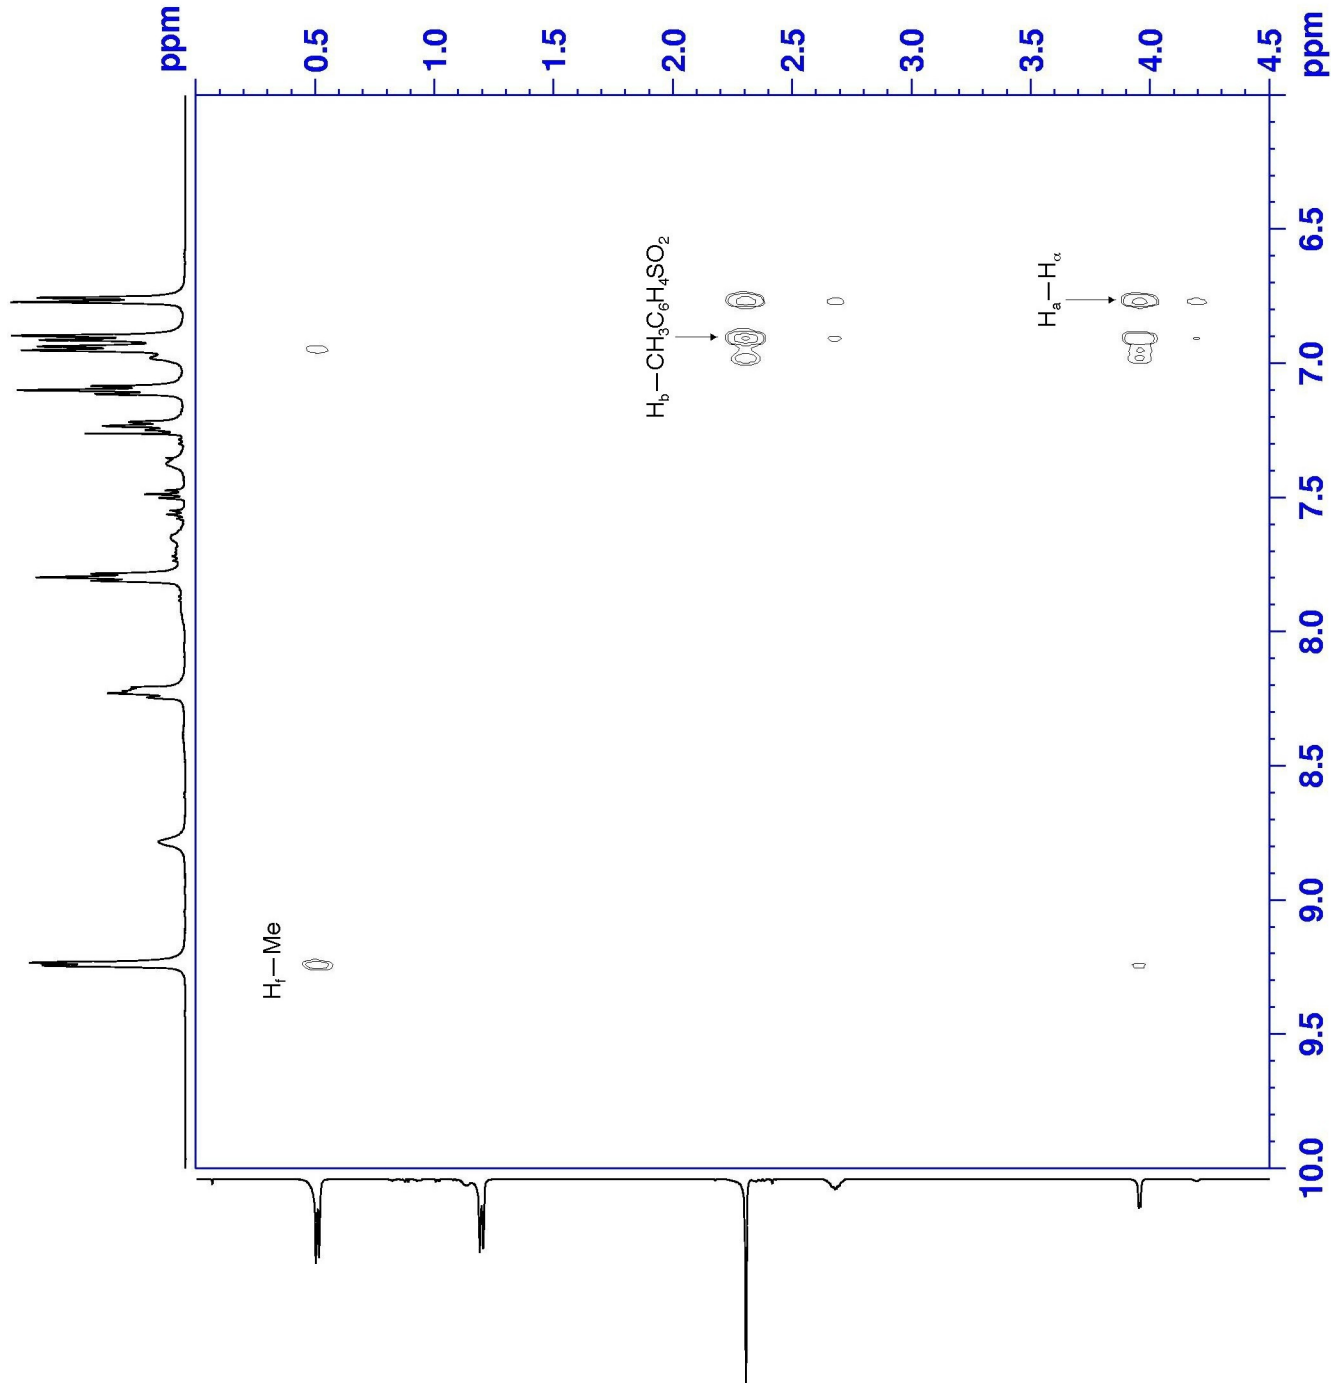

Current Data Parameters  
 NAME 11C-189-PB  
 EXPNO 5  
 PROCNO 1

F2 - Acquisition Parameters  
 Date\_ 20030710  
 Time 21.35  
 INSTRUM drx500  
 PROBHD 5 mm Multinucl  
 PULPROG noesyph  
 TD 2048  
 SOLVENT CDCl3  
 NS 16  
 DS 4  
 SWH 6067.961 Hz  
 FIDRES 2.962872 Hz  
 AQ 0.1688052 sec  
 RG 90.5  
 DW 82.400 usec  
 DE 6.00 usec  
 TE 295.8 K  
 d0 0.00006929 sec  
 d1 2.11223006 sec  
 d8 2.00000000 sec  
 INO 0.00016480 sec  
 MCREST 0.00000000 sec  
 MCWRR 1.05611503 sec  
 STICNT 128

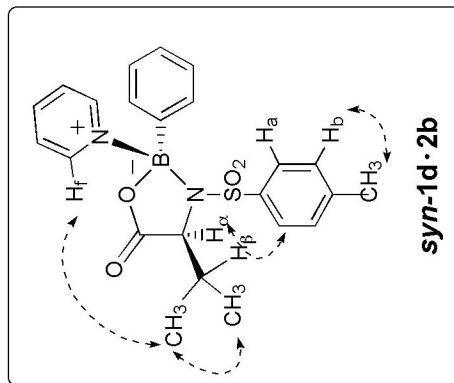

Current Data Parameters  
 NAME 11C-189-PB  
 EXNO 5  
 PROGNO 1

F2 - Acquisition Parameters  
 Date\_ 20030710  
 Time 21.35  
 INSTRUM drx500  
 PROBHD 5 mm Multinucl  
 PULPROG noesyph  
 TD 2048  
 SOLVENT CDCl3  
 NS 16  
 DS 4  
 SWH 6067.961 Hz  
 FIDRES 2.962872 Hz  
 AQ 0.1688052 sec  
 RG 90.5  
 DW 82.400 usec  
 DE 6.00 usec  
 TE 295.8 K  
 g0 0.00006929 sec  
 D1 2.11223006 sec  
 D8 2.00000000 sec  
 INO 0.00016480 sec  
 MCREST 0.00000000 sec  
 MCWRK 1.05611503 sec  
 STCNT 128

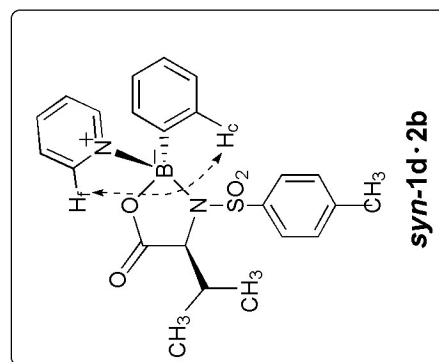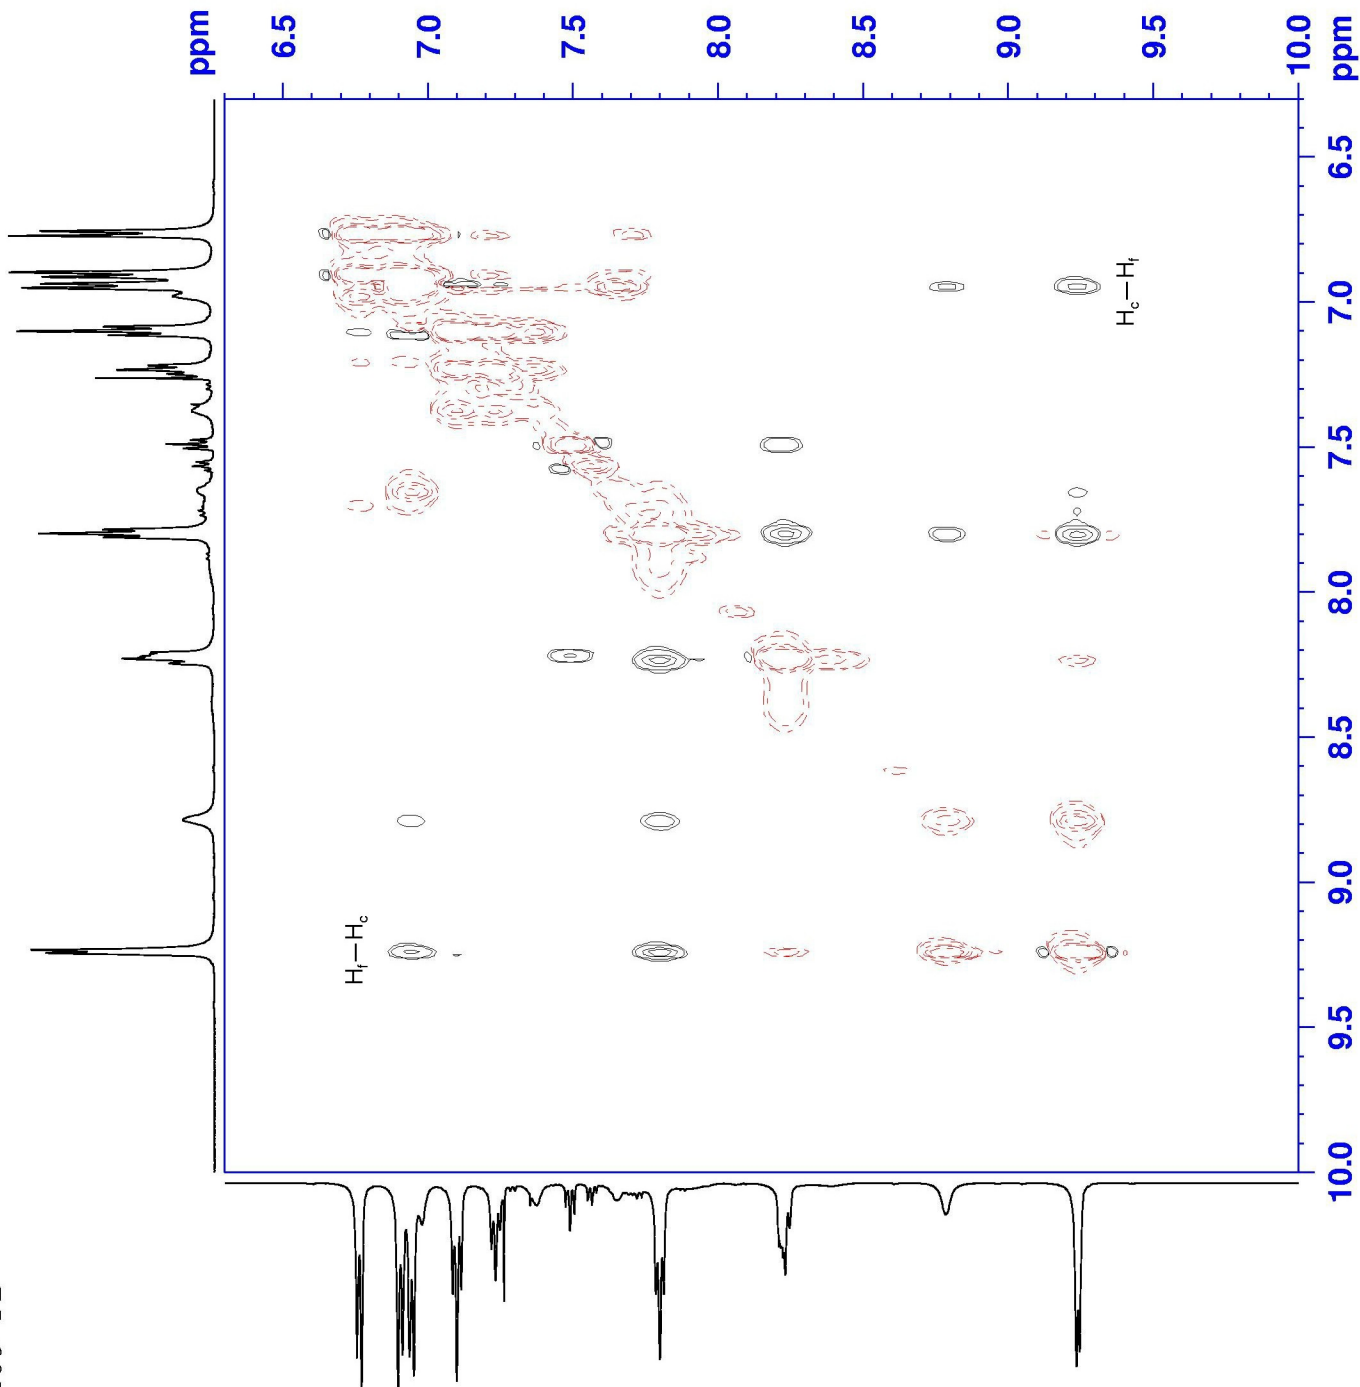

Supplement: b413370f-7.pdf [file b413370f-7.pdf]
