# Supplementary material for: High facial selectivity observed in amine coordination to chiral oxazaborolidinones
Source: Royal Society of Chemistry journal article supplement (doi:10.1039/b413370f), 2004-12-16

Current Data Parameters  
 NAME 11C-209-PB  
 EXPNO 1  
 PROCNO 1

F2 - Acquisition Parameters  
 Date\_ 20031002  
 Time 18.42  
 INSTRUM drx500  
 PROBHD 5 mm Multinucl  
 PULPROG zg30  
 TD 65536  
 SOLVENT CDCl3  
 NS 16  
 DS 2  
 SWH 10330.578 Hz  
 FIDRES 0.157632 Hz  
 AQ 3.171923 sec  
 RG 128  
 DW 48.400 usec  
 DE 6.00 usec  
 TE 296.0 K  
 D1 1.0000000 sec  
 MCREST 0.0000000 sec  
 MCWRR 0.01500000 sec

===== CHANNEL f1 =====  
 NUC1 1H  
 P1 10.30 usec  
 PL1 -6.00 dB  
 SFO1 500.1330885 MHz

F2 - Processing parameters  
 SI 32768  
 SF 500.1300129 MHz  
 WDM EM  
 SSB 0  
 LB 0.30 Hz  
 GB 0  
 PC 1.00

1D NMR plot parameters  
 CX 24.00 cm  
 CY 0.00 cm  
 F1P 9.543 ppm  
 F1 4772.89 Hz  
 F2P 0.543 ppm  
 F2 271.72 Hz  
 PPMCH 0.37500 ppm/cm  
 HZCM 187.54875 Hz/cm

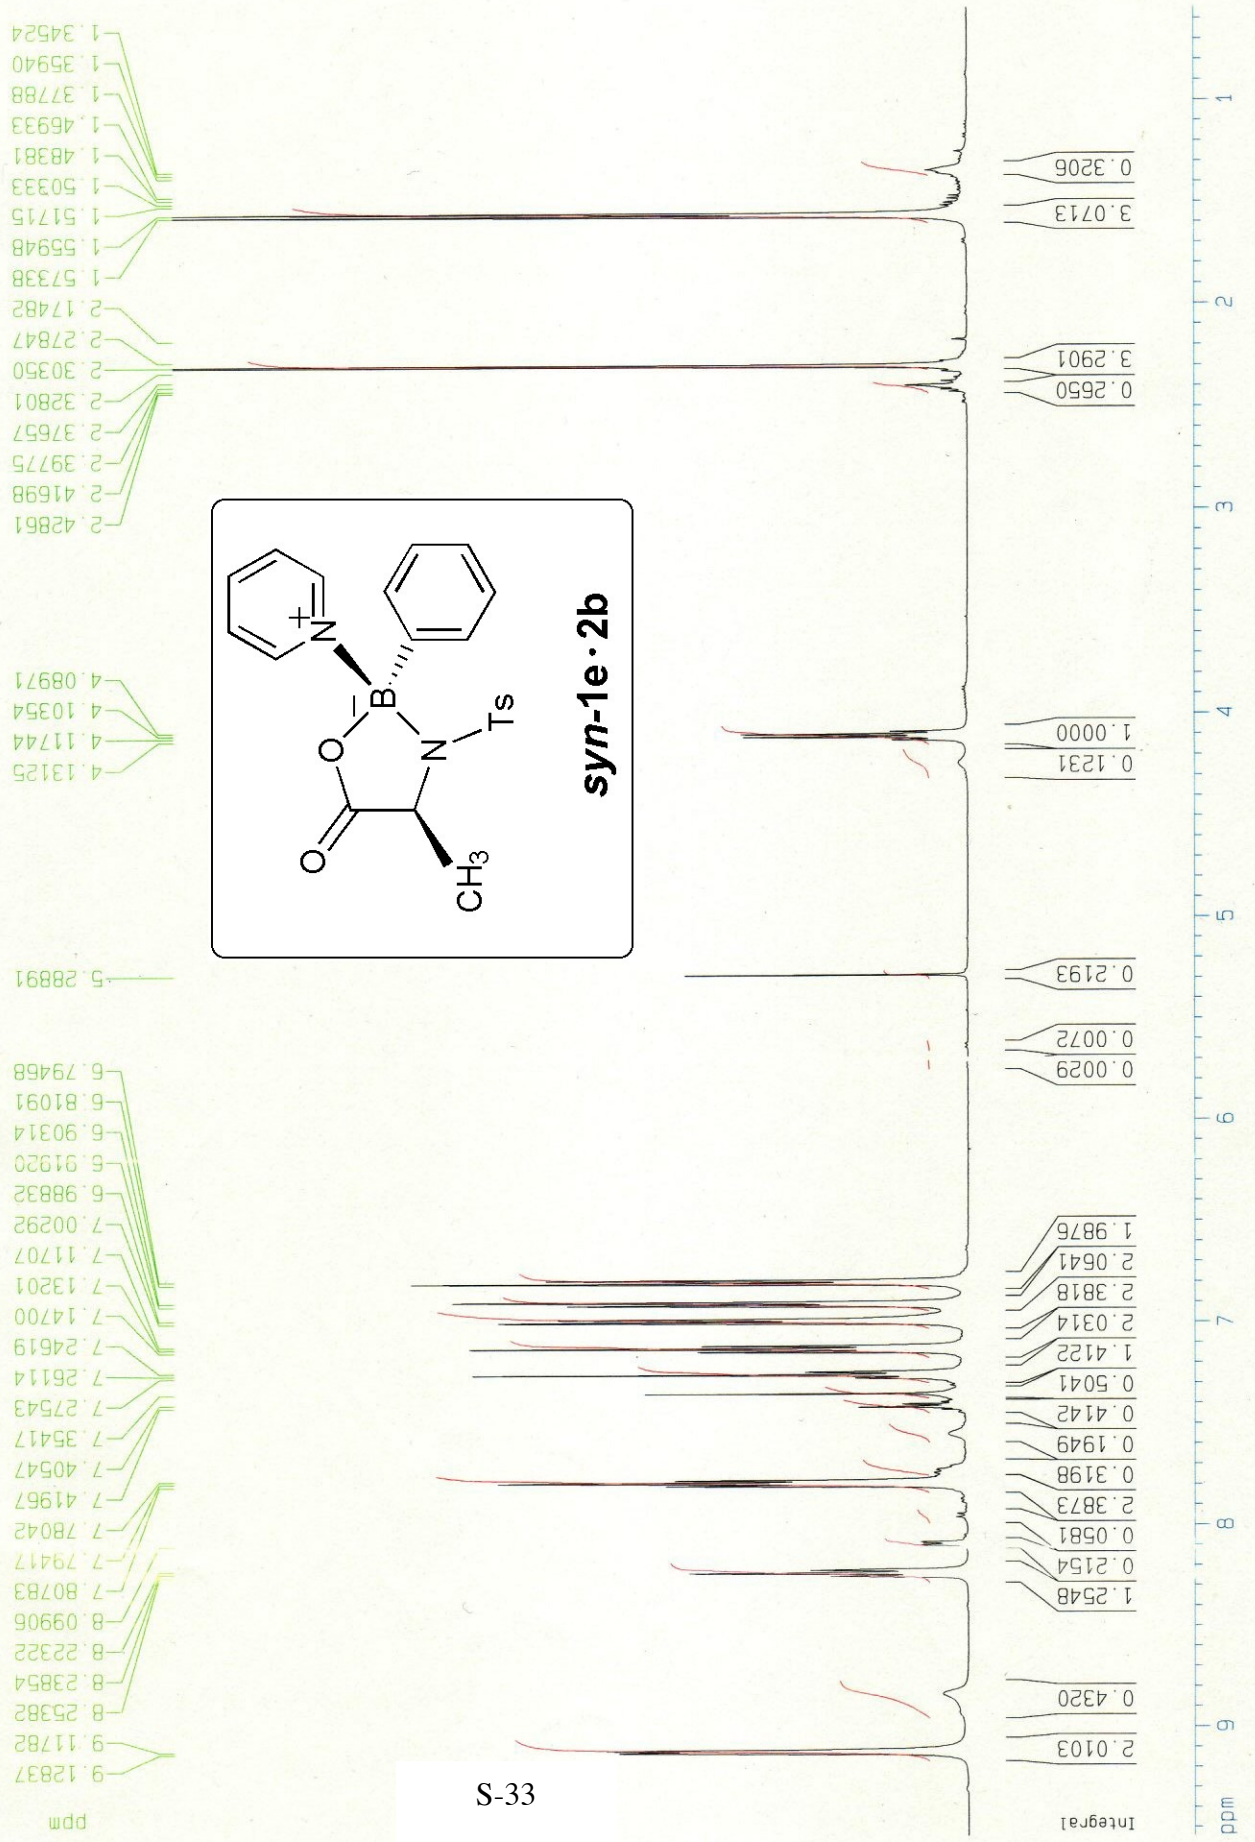

S-33

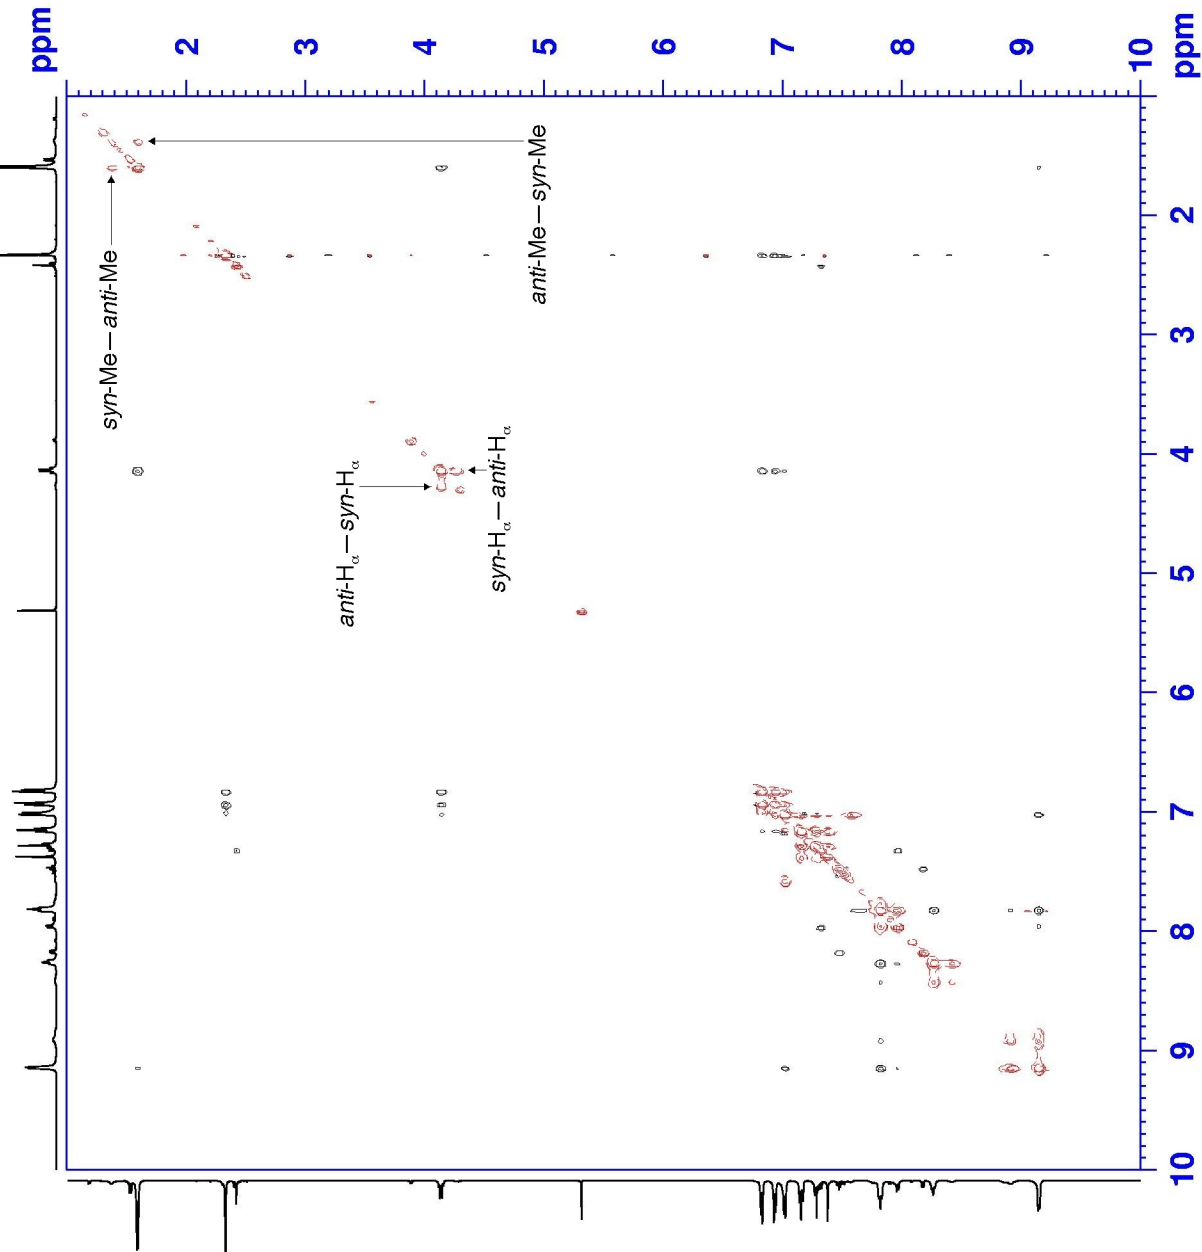

Current Data Parameters  
 NAME 11C-176-PC  
 EXPNO 5  
 PROCNO 1

F2 - Acquisition Parameters  
 Date\_ 20030604  
 Time 21.18  
 INSTRUM DRX500  
 PROBHD 5 mm Multinu  
 PULPROG noesytp  
 TD 2048  
 SOLVENT CDC13  
 NS 16  
 DS 4  
 SWH 6009.615 Hz  
 FIDRES 2.934382 Hz  
 AQ 0.1704436 sec  
 RG 114  
 DW 83.200 usec  
 DE 6.00 usec  
 TE 300.0 K  
 d0 0.00000300 sec  
 D1 2.01024008 sec  
 P1 9.30 usec  
 SF01 500.1322692 MHz  
 NUC1 1H  
 PL1 -6.00 dB  
 D8 2.00000000 sec  
 IN0 0.00008320 sec

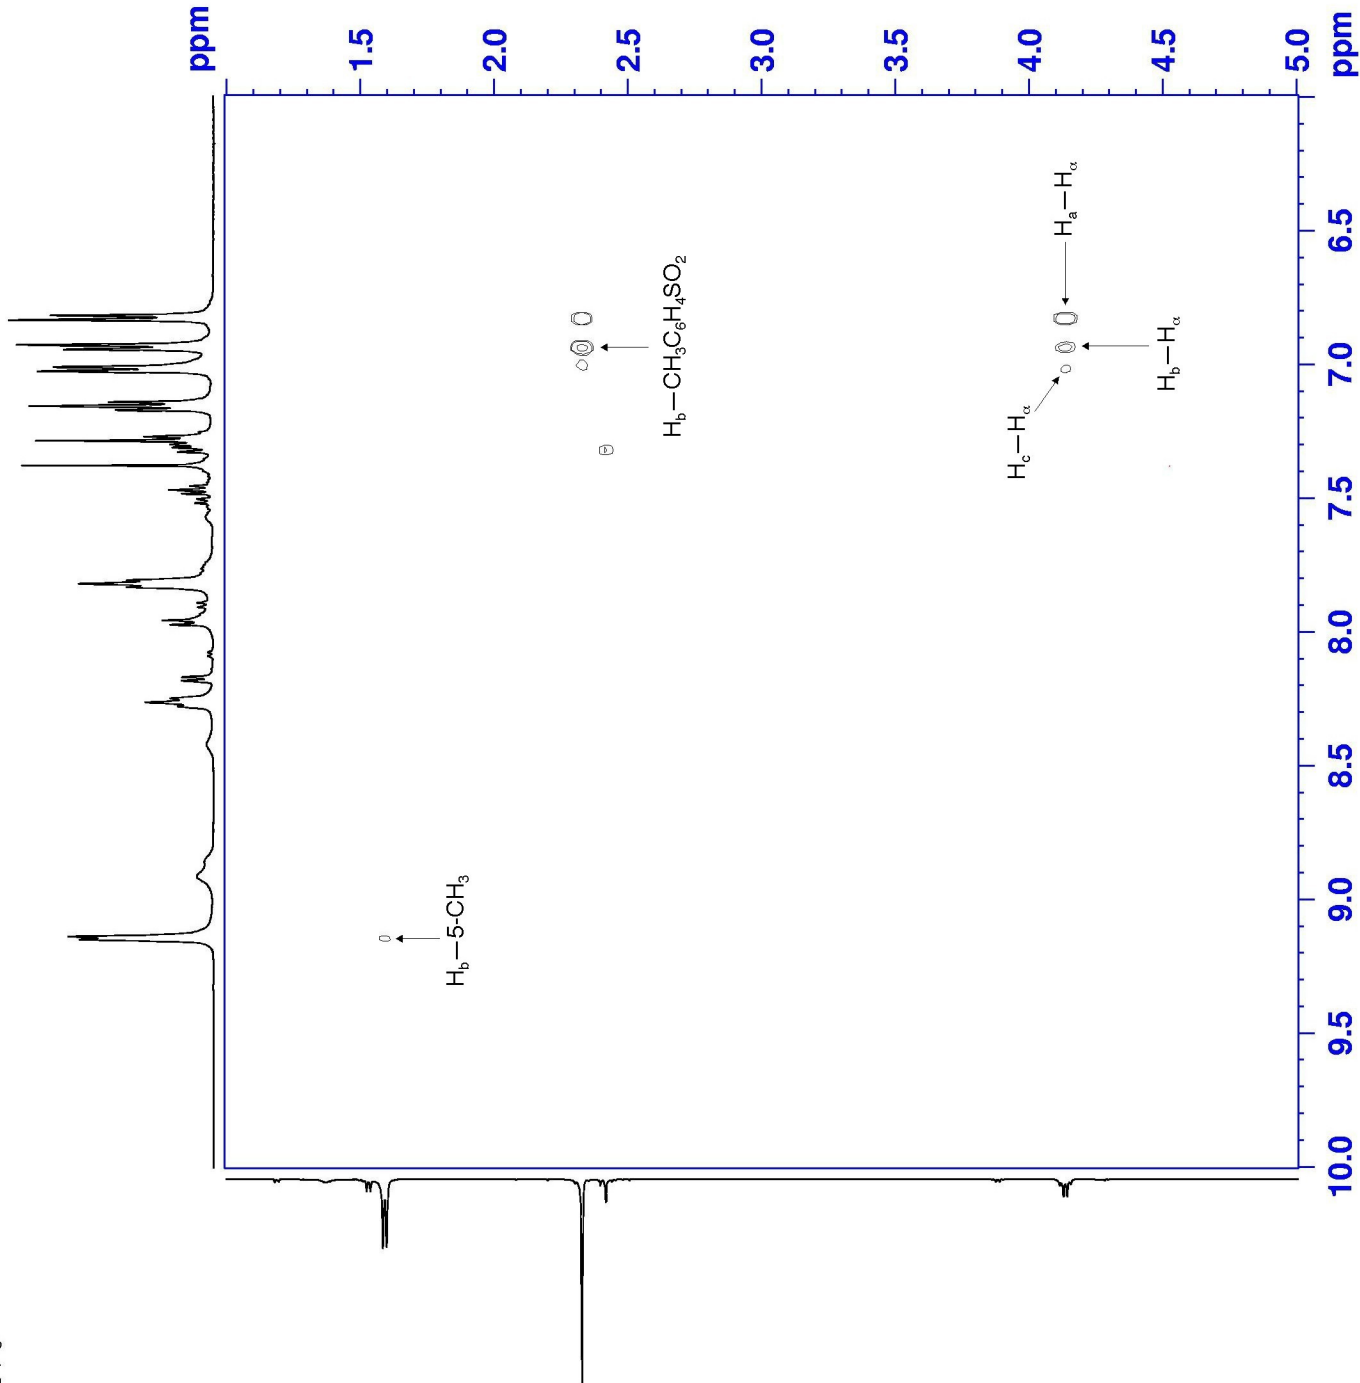

Current Data Parameters  
 NAME 11C-176-PC  
 EXPNO 5  
 PROCNO 1

F2 - Acquisition Parameters  
 Date\_ 20030604  
 Time 21.18  
 INSTRUM DRX500  
 PROBHD 5 mm Multinu  
 PULPROG noesytp  
 TD 2048  
 SOLVENT CDC13  
 NS 16  
 DS 4  
 SWH 6009.615 Hz  
 FIDRES 2.934382 Hz  
 AQ 0.1704436 sec  
 RG 114  
 DW 83.200 usec  
 DE 6.00 usec  
 TE 300.0 K  
 d0 0.00000300 sec  
 D1 2.01024008 sec  
 P1 9.30 usec  
 SFO1 500.1322692 MHz  
 NUC1 1H  
 PL1 -6.00 dB  
 D8 2.00000000 sec  
 IN0 0.00008320 sec

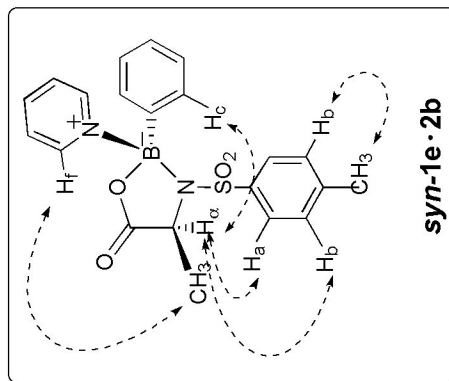

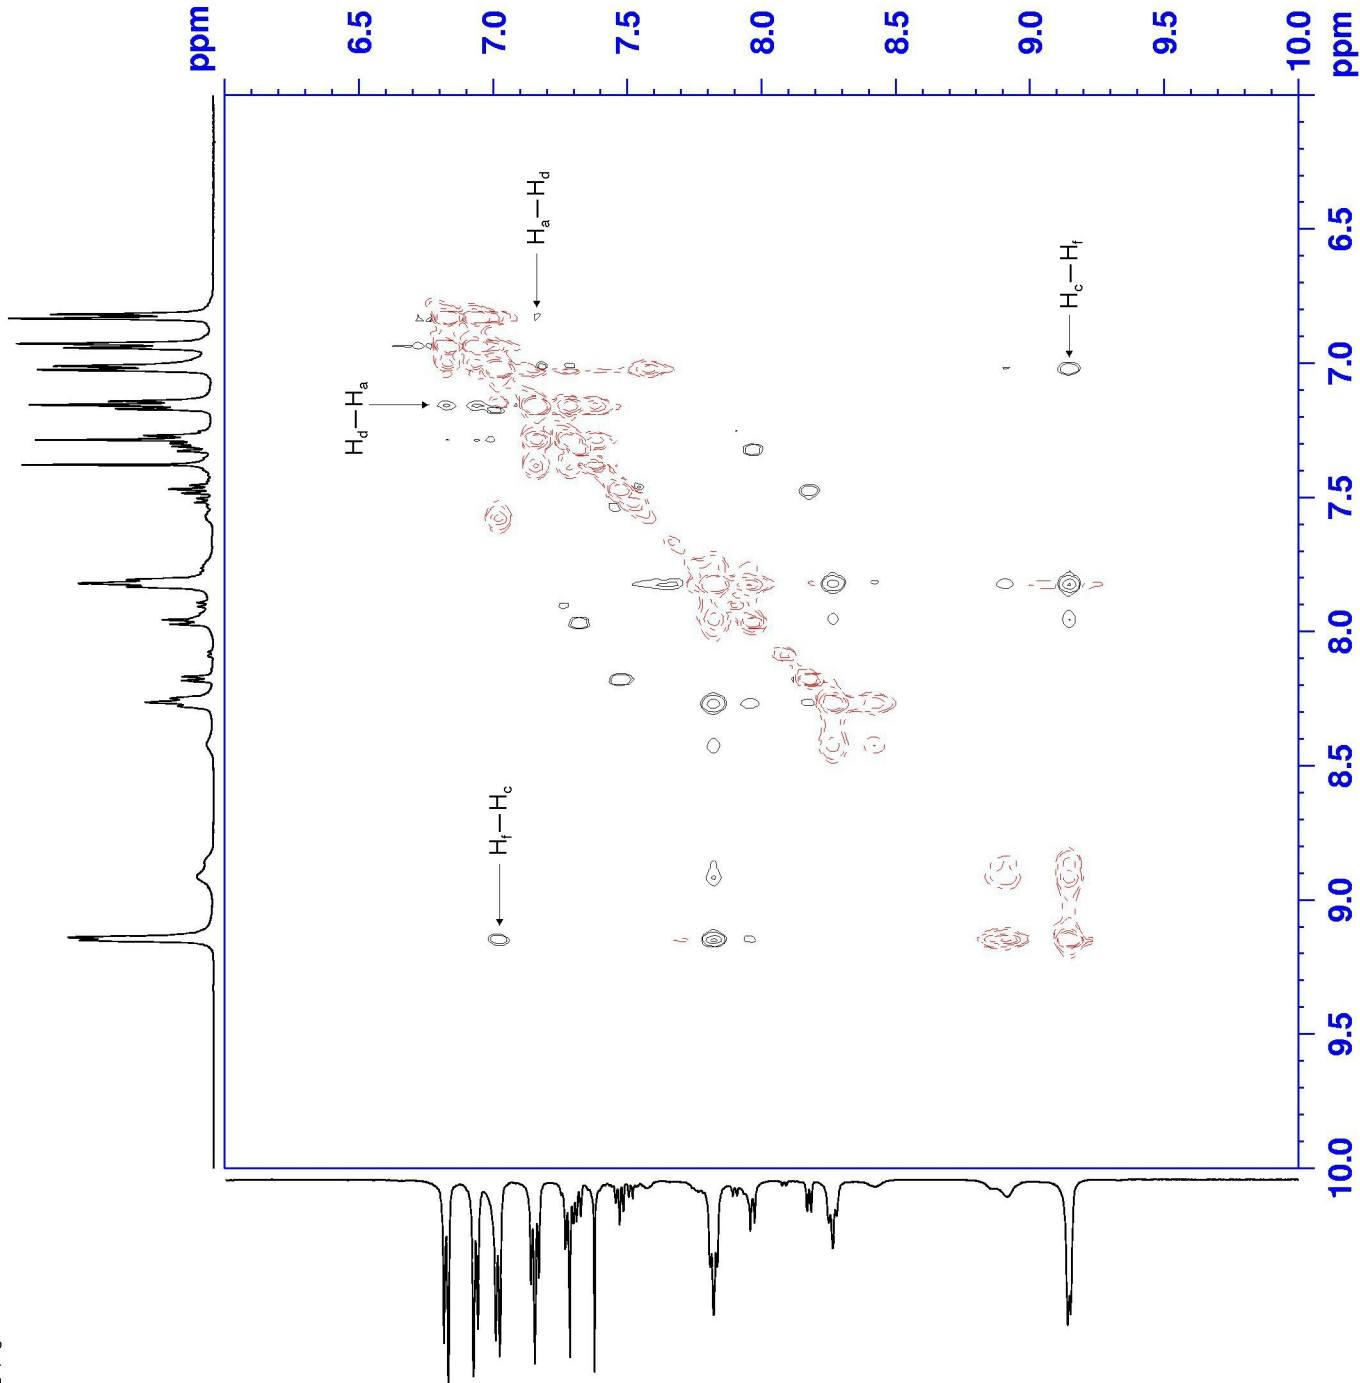

Current Data Parameters  
 NAME 11C-176-PC  
 EXPNO 5  
 PROCNO 1

F2 - Acquisition Parameters  
 Date\_ 20030604  
 Time 21.18  
 INSTRUM DRX500  
 PROBHD 5 mm Multinu  
 PULPROG noesytp  
 TD 2048  
 SOLVENT CDC13  
 NS 16  
 DS 4  
 SWH 6009.615 Hz  
 FIDRES 2.934382 Hz  
 AQ 0.1704436 sec  
 RG 114  
 DW 83.200 usec  
 DE 6.00 usec  
 TE 300.0 K  
 d0 0.00000300 sec  
 D1 2.01024008 sec  
 P1 9.30 usec  
 SFO1 500.1322692 MHz  
 NUC1 1H  
 PL1 -6.00 dB  
 D8 2.00000000 sec  
 INO 0.00008320 sec

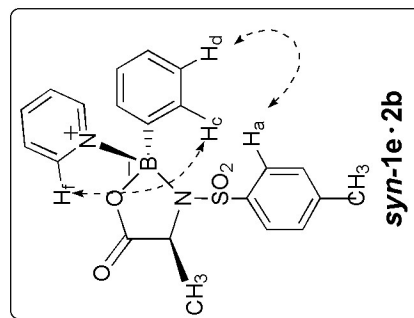

Supplement: b413370f-8.pdf [file b413370f-8.pdf]
