# Supplementary material for: High facial selectivity observed in amine coordination to chiral oxazaborolidinones
Source: Royal Society of Chemistry journal article supplement (doi:10.1039/b413370f), 2004-12-16

Current Data Parameters  
 NAME 11C-206-PA  
 EXPNO 1  
 PROCNO 1  
 F2 - Acquisition Parameters  
 Date\_ 20030925  
 Time 18.59  
 INSTRUM drx500  
 PROBHD 5 mm Multinucl  
 PULPROG zg30  
 TD 65536  
 SOLVENT CDC13  
 NS 16  
 DS 2  
 SWH 10330.578 Hz  
 FIDRES 0.157632 Hz  
 AQ 3.1719923 sec  
 RG 228.1  
 DW 48.400 usec  
 DE 6.00 usec  
 TE 296.1 K  
 D1 1.00000000 sec  
 MCREST 0.00000000 sec  
 MCMRK 0.01500000 sec  
 ===== CHANNEL f1 =====  
 NUC1 1H  
 P1 10.30 usec  
 PL1 -6.00 dB  
 SFO1 500.1330885 MHz  
 F2 - Processing parameters  
 SI 32768  
 SF 500.1300129 MHz  
 KW EM  
 EN 0  
 LB 0.30 Hz  
 GB 0  
 PC 1.00  
 1D NMR plot parameters  
 CX 24.00 cm  
 CY 0.00 cm  
 F1P 9.856 ppm  
 F1 4929.27 Hz  
 F2P 0.856 ppm  
 F2 428.10 Hz  
 PPMCM 0.37500 ppm/cm  
 HZCM 187.54875 Hz/cm

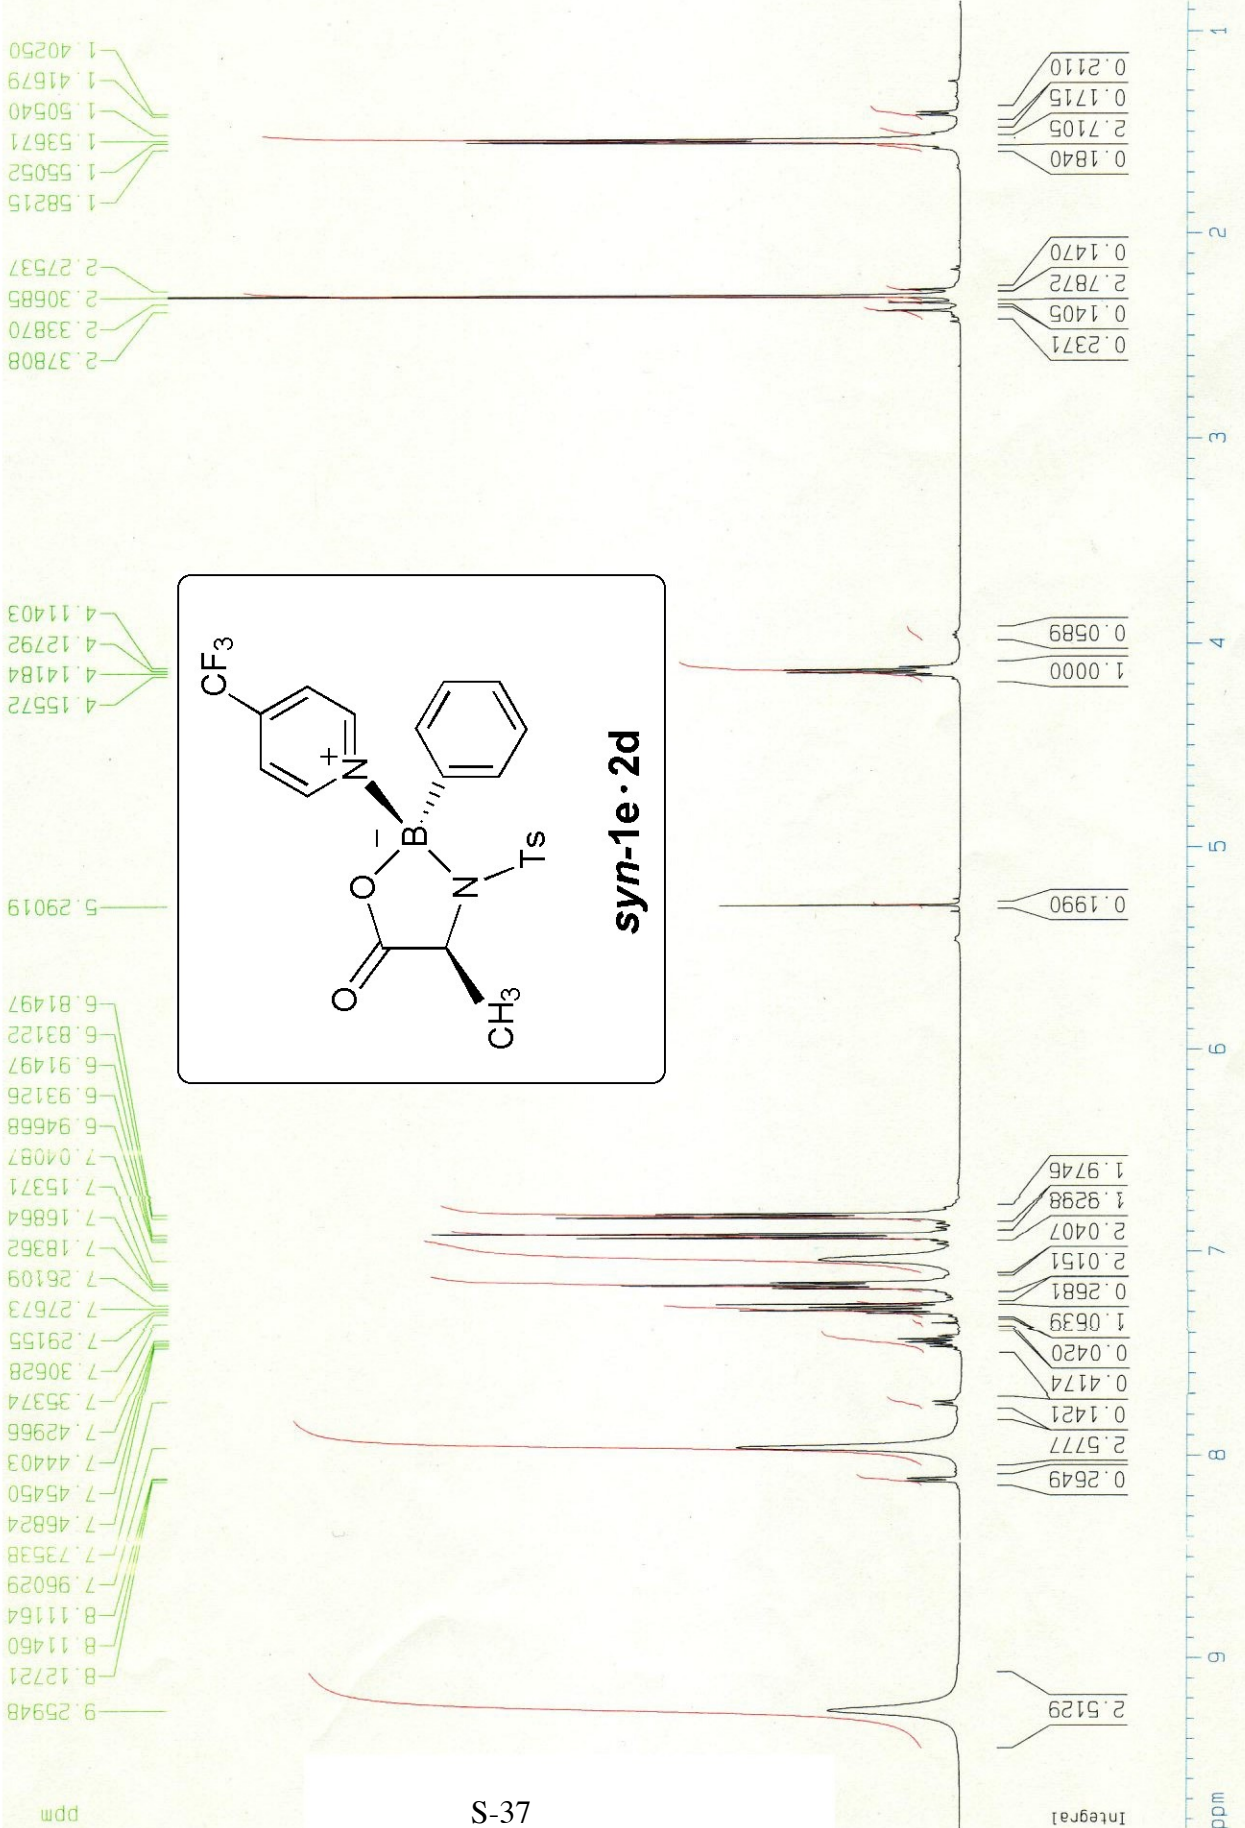

11C-206-PC  
NOESY  
4-trifluoromethylpyridine

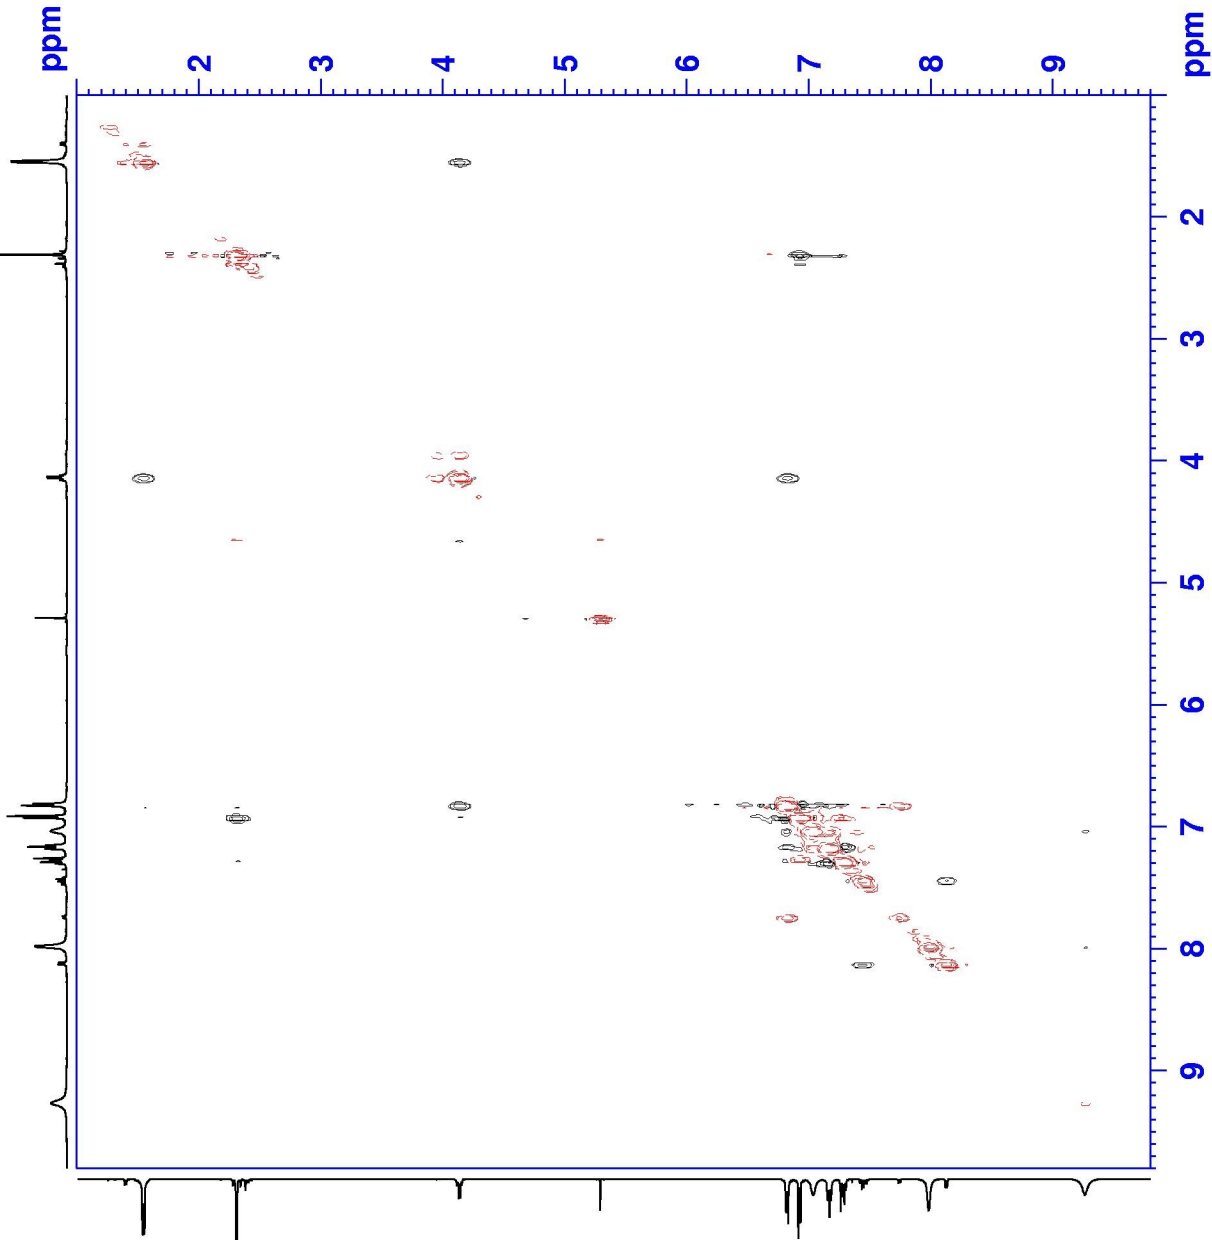

Current Data Parameters  
NAME 11C-206-PC  
EXPNO 5  
PROCNO 1

F2 - Acquisition Parameters  
Date\_ 20030929  
Time 21.53  
INSTRUM drx500  
PROBHD 5 mm Multinucl  
PULPROG noesyph  
TD 2048  
SOLVENT CDCl3  
NS 16  
DS 4  
SWH 6250.000 Hz  
FIDRES 3.051758 Hz  
AQ 0.1638900 sec  
RG 90.5  
DW 80.000 usec  
DE 6.00 usec  
TE 295.9 K  
d0 0.00006689 sec  
d1 2.11632609 sec  
d8 2.00000000 sec  
INO 0.00016000 sec  
MCREST 0.00000000 sec  
MCWRK 1.05816305 sec  
STCNT 128

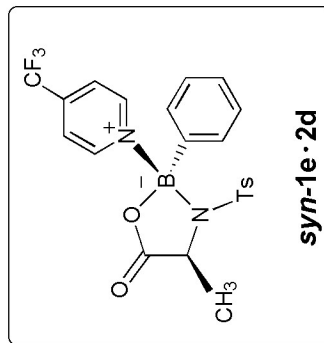

11C-206-PC  
 NOESY  
 4-trifluoromethylpyridine

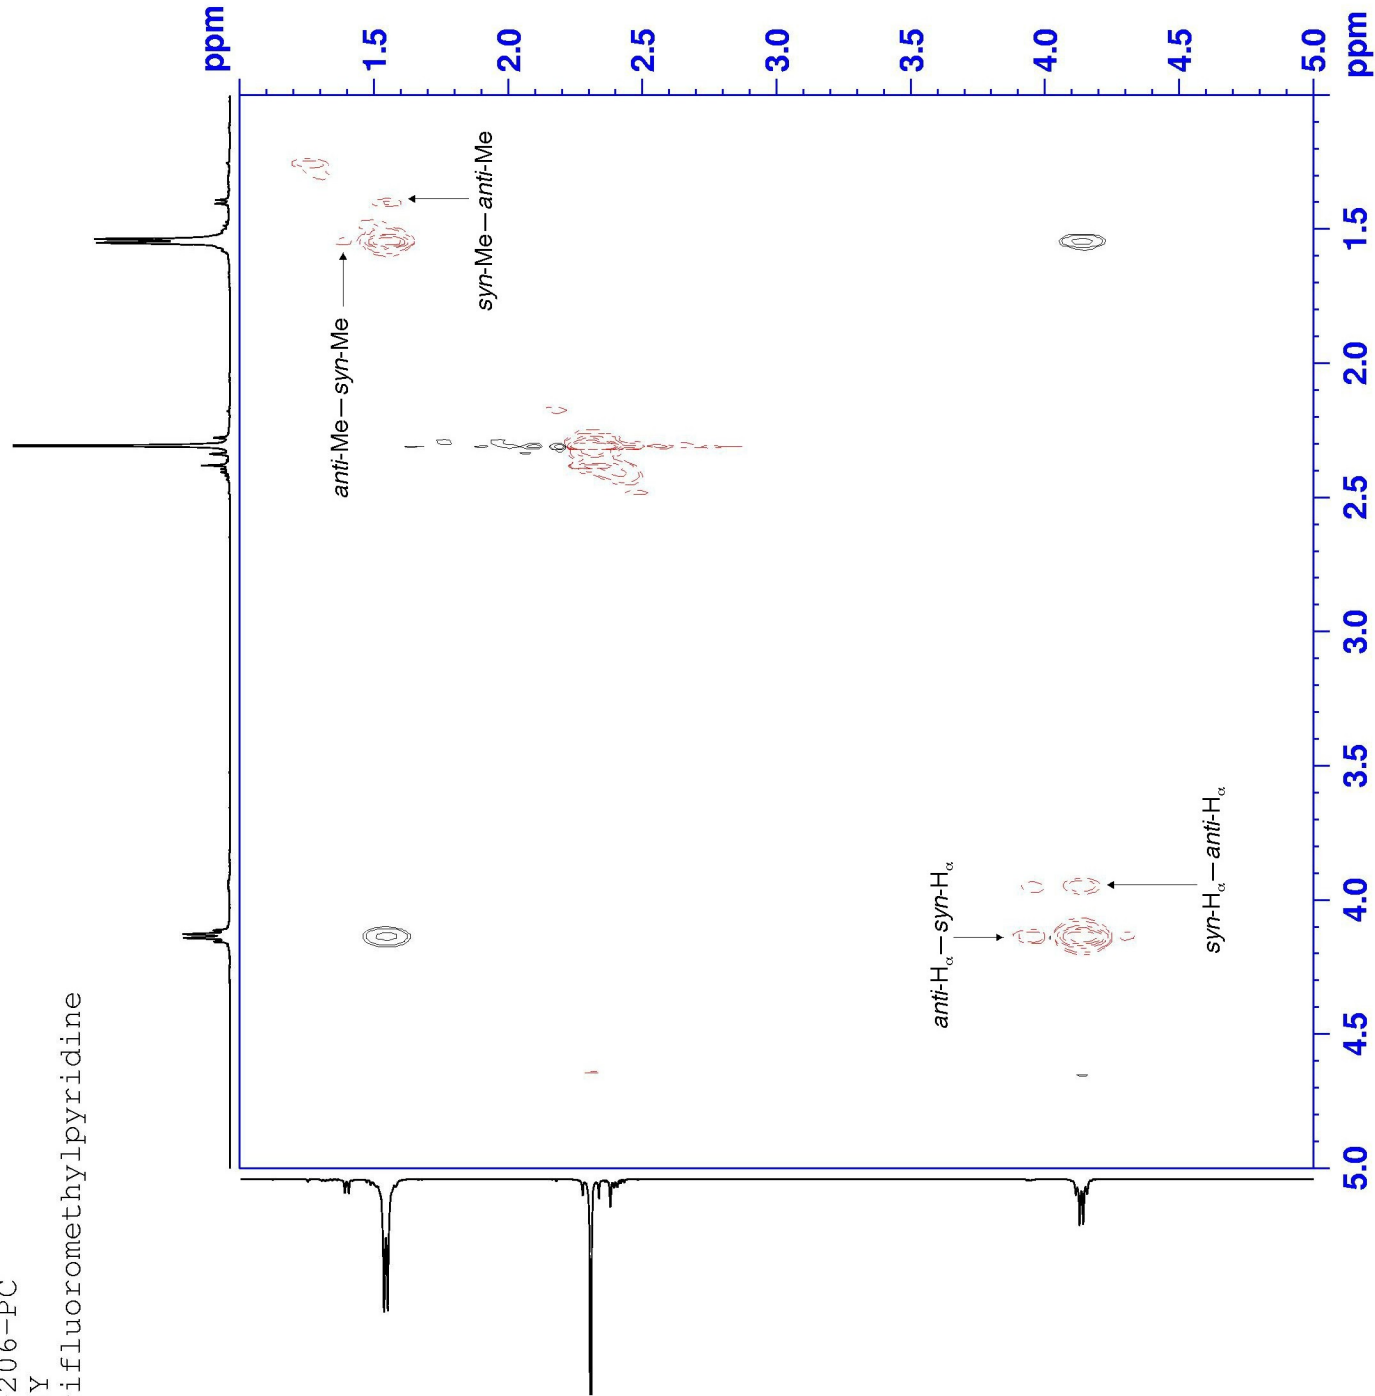

Current Data Parameters  
 NAME 11C-206-PC  
 EXPNO 5  
 PROCNO 1

F2 - Acquisition Parameters  
 Date\_ 20030929  
 Time 21.53  
 INSTRUM drx500  
 PROBHD 5 mm Multinucl  
 PULPROG noesyph  
 TD 2048  
 SOLVENT CDCl3  
 NS 16  
 DS 4  
 SWH 6250.000 Hz  
 FIDRES 3.051758 Hz  
 AQ 0.1638900 sec  
 RG 90.5  
 DW 80.000 usec  
 DE 6.00 usec  
 TE 295.9 K  
 g0 0.00006689 sec  
 D1 2.11632609 sec  
 D8 2.00000000 sec  
 INO 0.00016000 sec  
 MCREST 0.00000000 sec  
 MCWRK 1.05816305 sec  
 STICNT 128

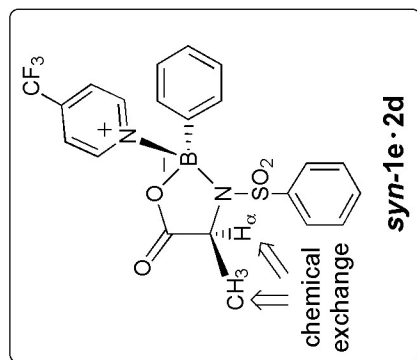

11C-206-PC  
NOESY  
4-trifluoromethylpyridine

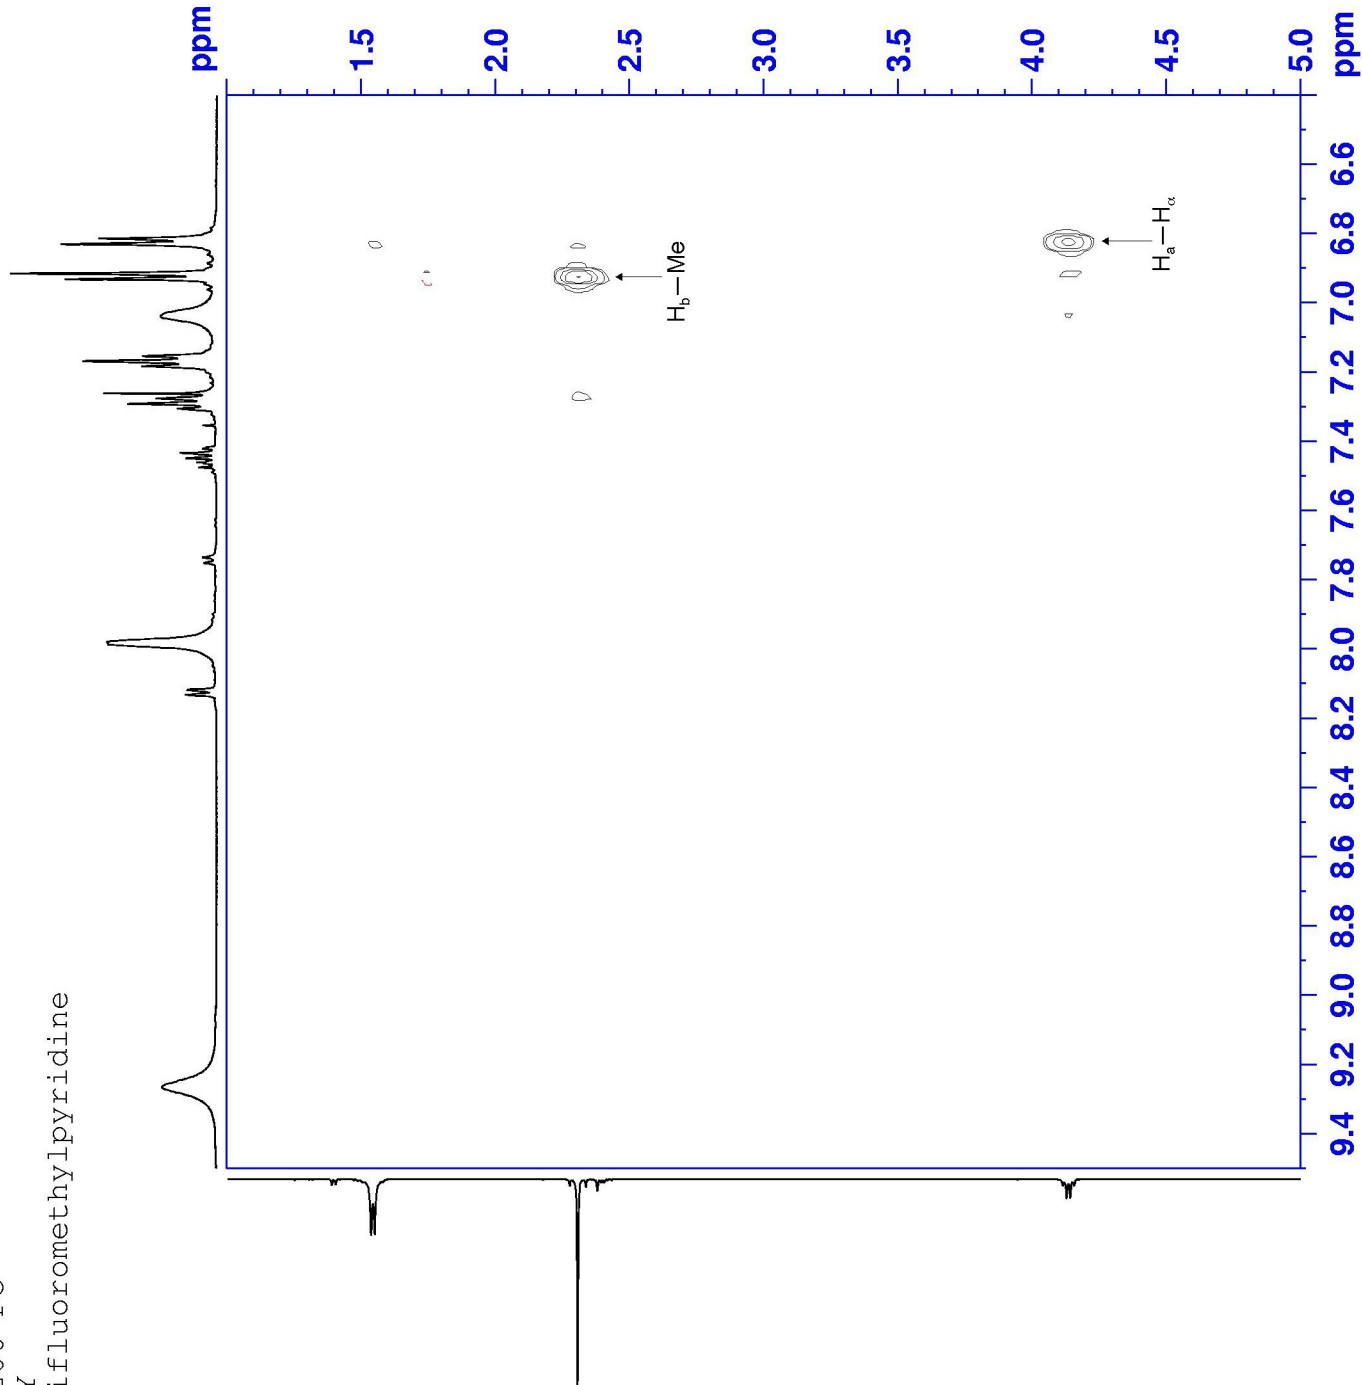

Current Data Parameters  
NAME 11C-206-PC  
EXPNO 5  
PROCNO 1

F2 - Acquisition Parameters  
Date\_ 20030929  
Time 21.53  
INSTRUM drx500  
PROBHD 5 mm Multinucl  
PULPROG noesyph  
TD 2048  
SOLVENT CDCl3  
NS 16  
DS 4  
SWH 6250.000 Hz  
FIDRES 3.051758 Hz  
AQ 0.1638900 sec  
RG 90.5  
DW 80.000 usec  
DE 6.00 usec  
TE 295.9 K  
G0 0.00006689 sec  
D1 2.11632609 sec  
D8 2.00000000 sec  
INO 0.00016000 sec  
MCREST 0.00000000 sec  
MCWRK 1.05816305 sec  
STCNT 128

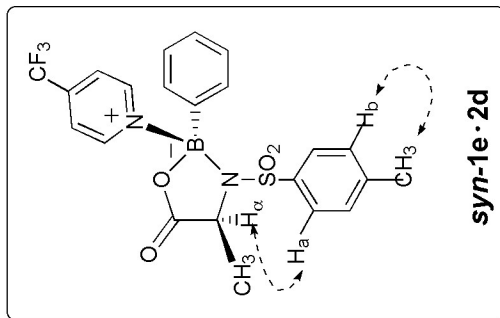

11C-206-PC  
 NOESY  
 4-trifluoromethylpyridine

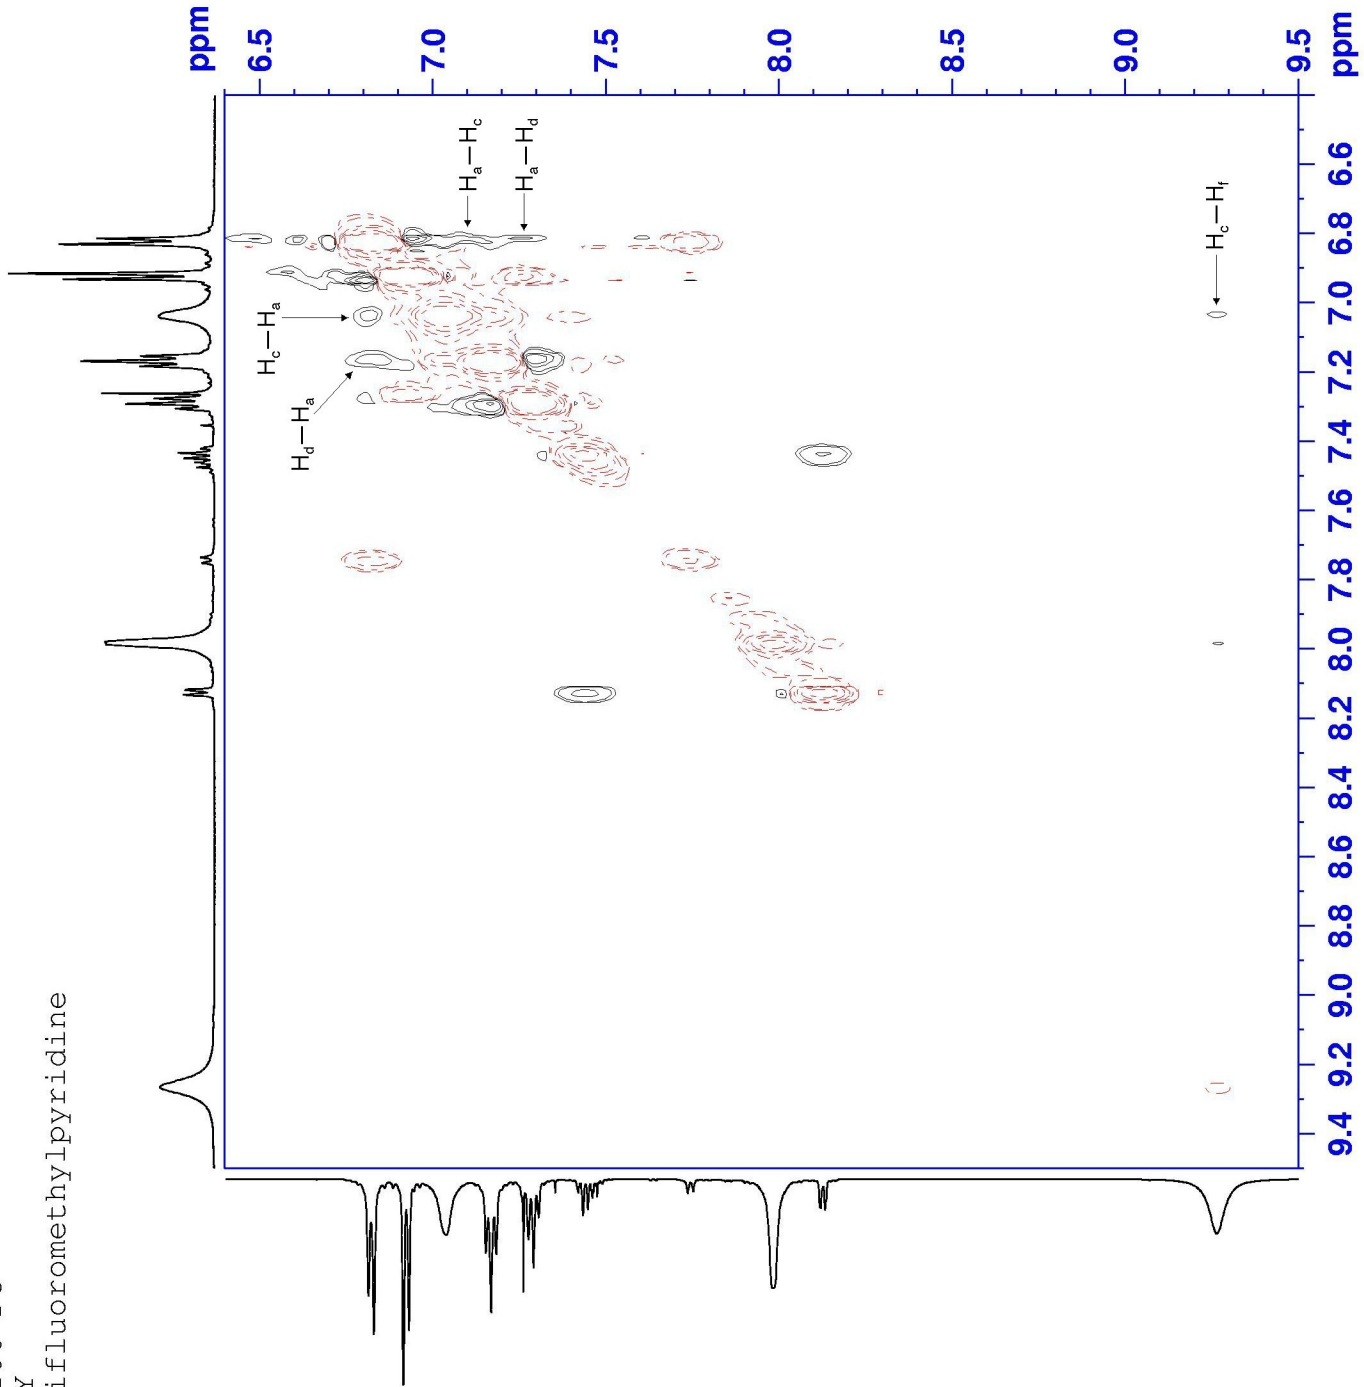

Current Data Parameters  
 NAME 11C-206-PC  
 EXPNO 5  
 PROCNO 1

F2 - Acquisition Parameters  
 Date\_ 20030929  
 Time 21.53  
 INSTRUM drx500  
 PROBHD 5 mm Multinucl  
 PULPROG noesyph  
 TD 2048  
 SOLVENT CDCl3  
 NS 16  
 DS 4  
 SWH 6250.000 Hz  
 FIDRES 3.051758 Hz  
 AQ 0.1638900 sec  
 RG 90.5  
 DW 80.000 usec  
 DE 6.00 usec  
 TE 295.9 K  
 g0 0.00006689 sec  
 D1 2.11632609 sec  
 D8 2.00000000 sec  
 INO 0.00016000 sec  
 MCREST 0.00000000 sec  
 MCWRK 1.05816305 sec  
 STICNT 128

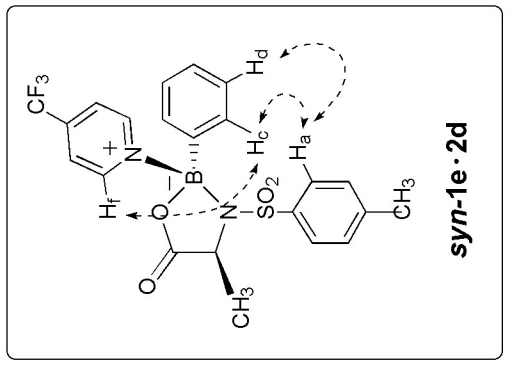

Supplement: b413370f-9.pdf [file b413370f-9.pdf]
