# Supplementary material for: High facial selectivity observed in amine coordination to chiral oxazaborolidinones
Source: Royal Society of Chemistry journal article supplement (doi:10.1039/b413370f), 2004-12-16

11C-233-PB  
Ala-Ts-Ph.4-Me-Py

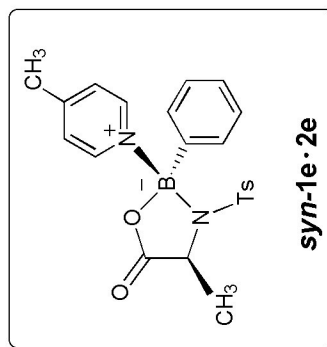

```
Current Data Parameters
NAME      11C-233-PC
EXPNO     1
PROCNO    1

F2 - Acquisition Parameters
Date_     20040309
Time      21.23
INSTRUM   drx500
PROBHD    5 mm Multinucl
PULPROG   zg30
TD         65536
SOLVENT   CDCl3
NS         16
DS         2
SWH        10330.578 Hz
FIDRES     0.157632 Hz
AQ         3.1719923 sec
RG         128
DE         48.400 usec
TE         295.7 K
D1         1.0000000 sec
MCREST     0.0000000 sec
MCWRK     0.0150000 sec

===== CHANNEL f1 =====
NUC1       1H
P1         10.30 usec
PL1        -6.00 dB
SFO1       500.1330885 MHz

F2 - Processing parameters
SI         32768
SF         500.1300129 MHz
WDW        EM
SSB        0
LB         0.30 Hz
GB         0
PC         1.00
```

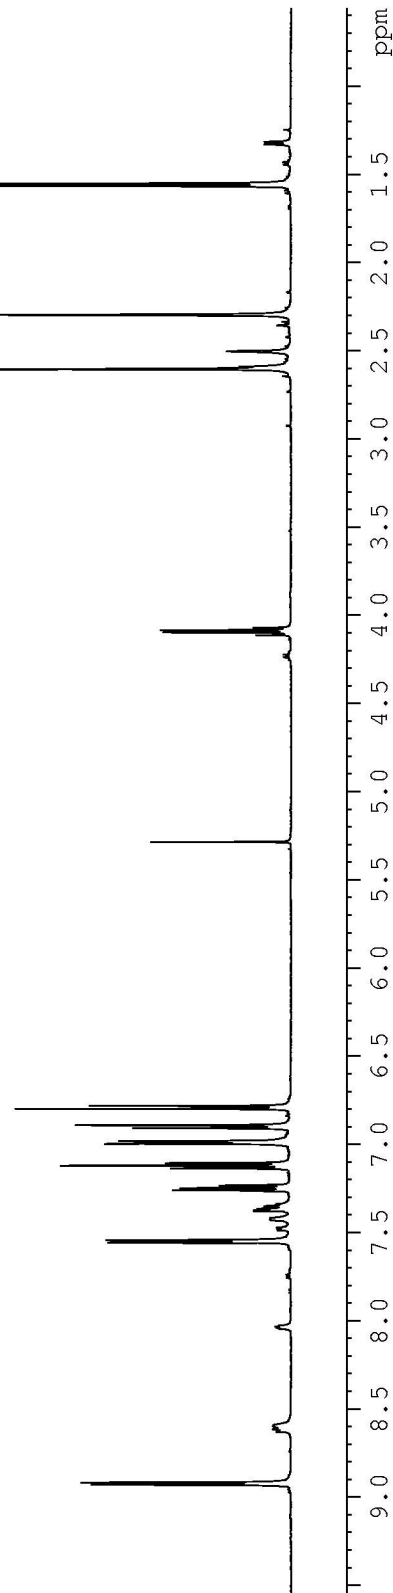

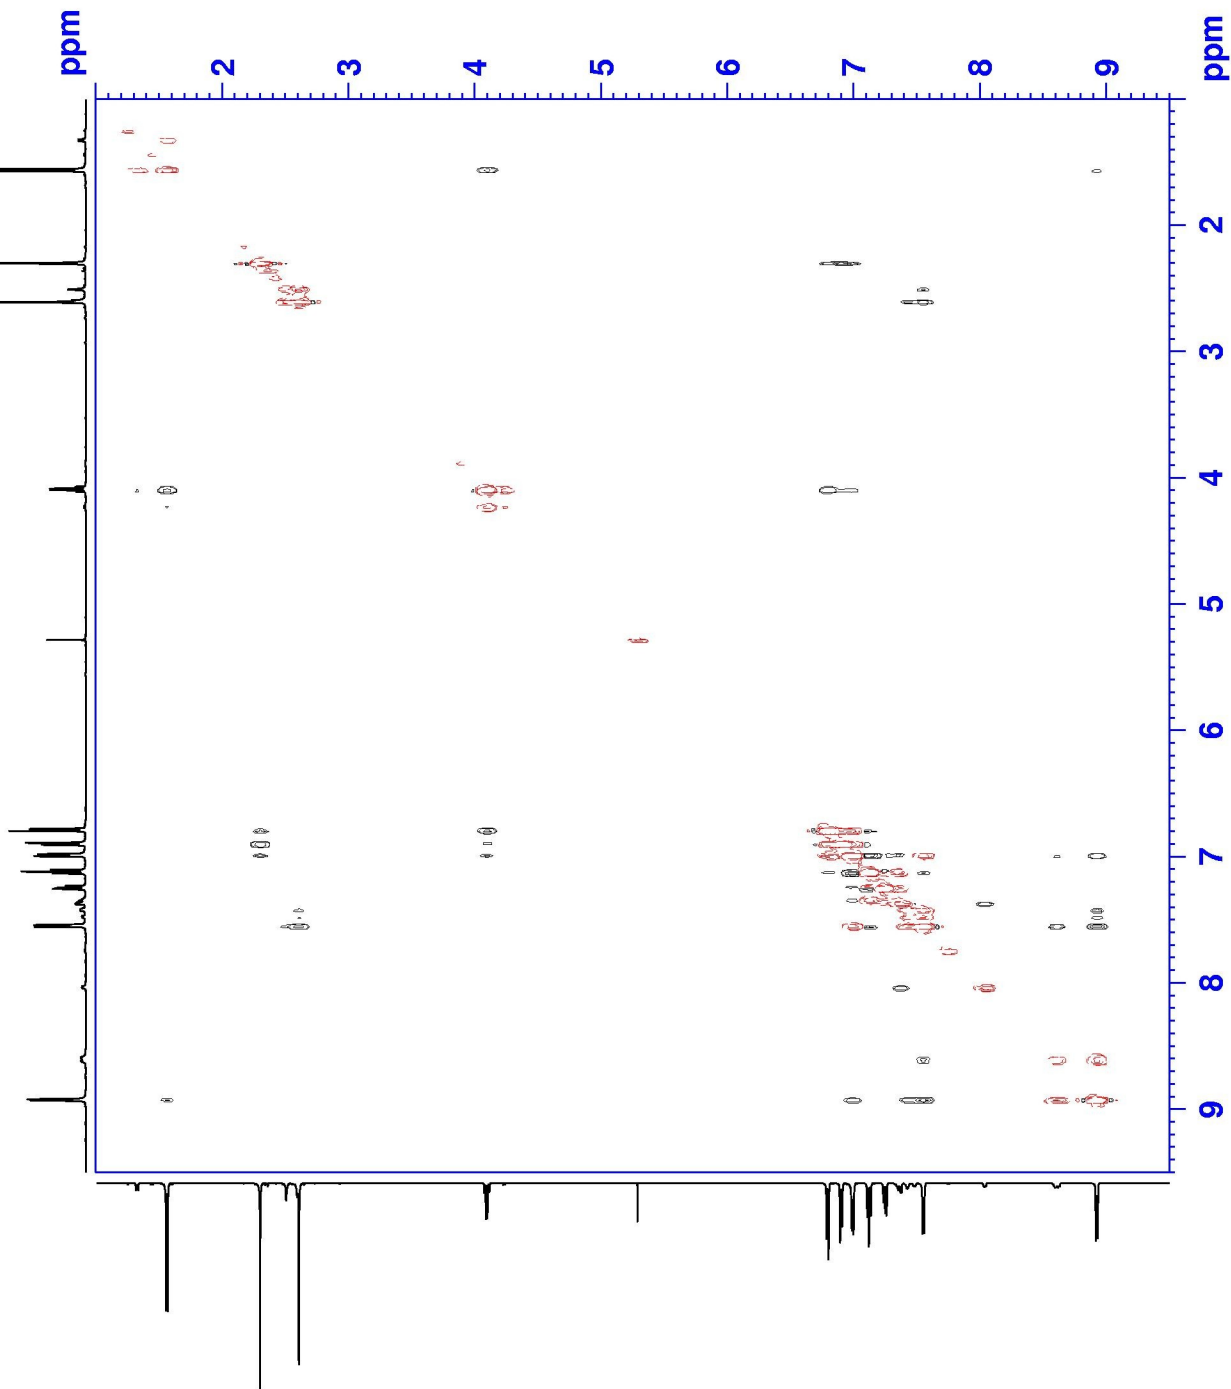

Current Data Parameters  
NAME 11C-233-PC  
EXPNO 5  
PROCNO 1

F2 - Acquisition Parameters  
Date\_ 20040309  
Time 21.37  
INSTRUM drx500  
PROBHD 5 mm Multinucl  
PULPROG noesyph  
TD 2048  
SOLVENT CDCl3  
NS 16  
DS 4  
SWH 5733.945 Hz  
FIDRES 2.799778 Hz  
AQ 0.1786356 sec  
RG 80.6  
DW 87.200 usec  
DE 6.00 usec  
TE 295.7 K  
G0 0.00007409 sec  
D1 2.10198998 sec  
D8 2.00000000 sec  
INO 0.00017440 sec  
MCREST 0.00000000 sec  
MCWRK 1.05099499 sec  
STCNT 128

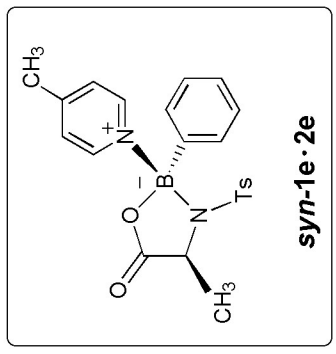

Current Data Parameters  
 NAME 11C-233-PC  
 EXPNO 5  
 PROCNO 1

F2 - Acquisition Parameters  
 Date\_ 20040309  
 Time 21.37  
 INSTRUM drx500  
 PROBHD 5 mm Multinucl  
 PULPROG noesyph  
 TD 2048  
 SOLVENT CDCl3  
 NS 16  
 DS 4  
 SWH 5733.945 Hz  
 FIDRES 2.799778 Hz  
 AQ 0.1786356 sec  
 RG 80.6  
 DW 87.200 usec  
 DE 6.00 usec  
 TE 295.7 K  
 g0 0.00007409 sec  
 D1 2.10198998 sec  
 D8 2.00000000 sec  
 INO 0.00017440 sec  
 MCREST 0.00000000 sec  
 MCWRK 1.05099499 sec  
 STIC1 128

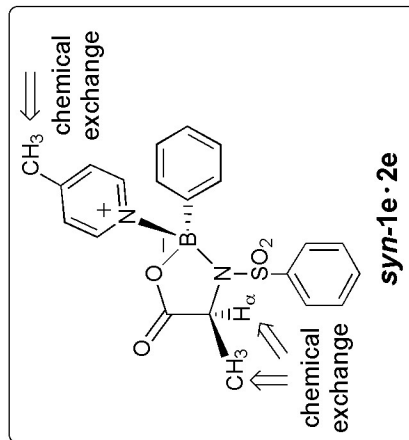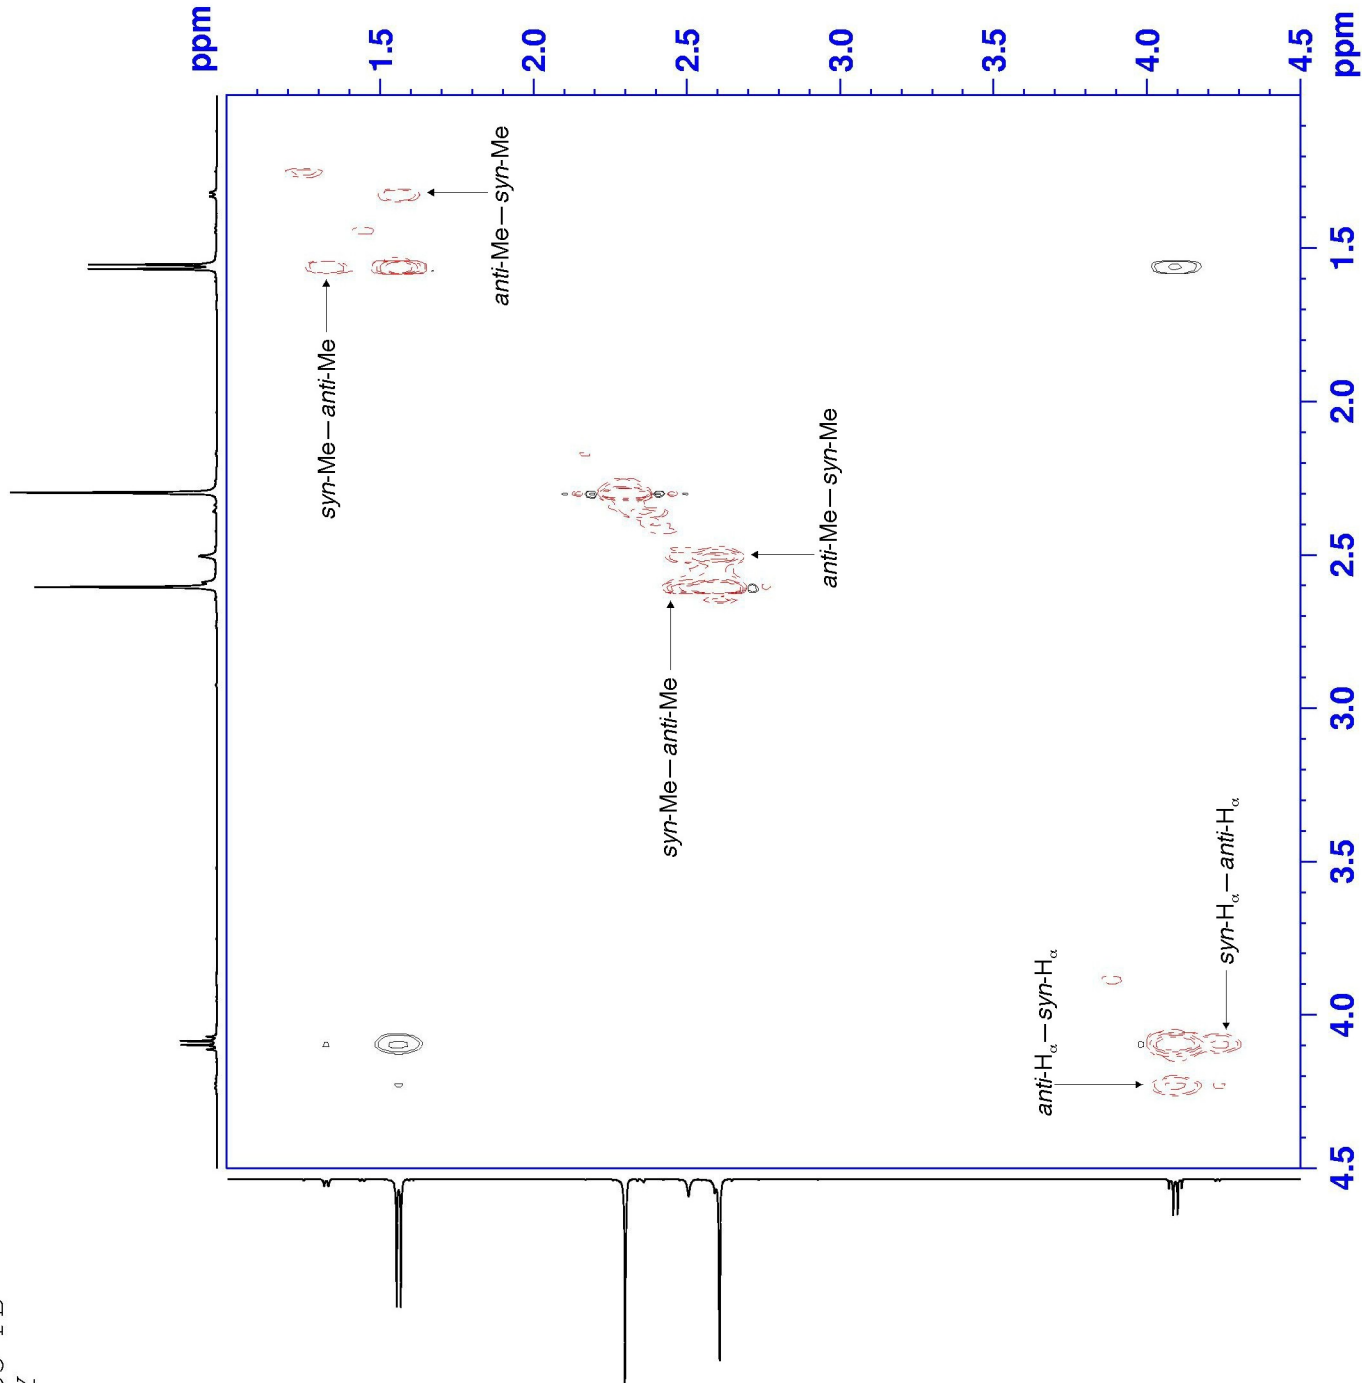

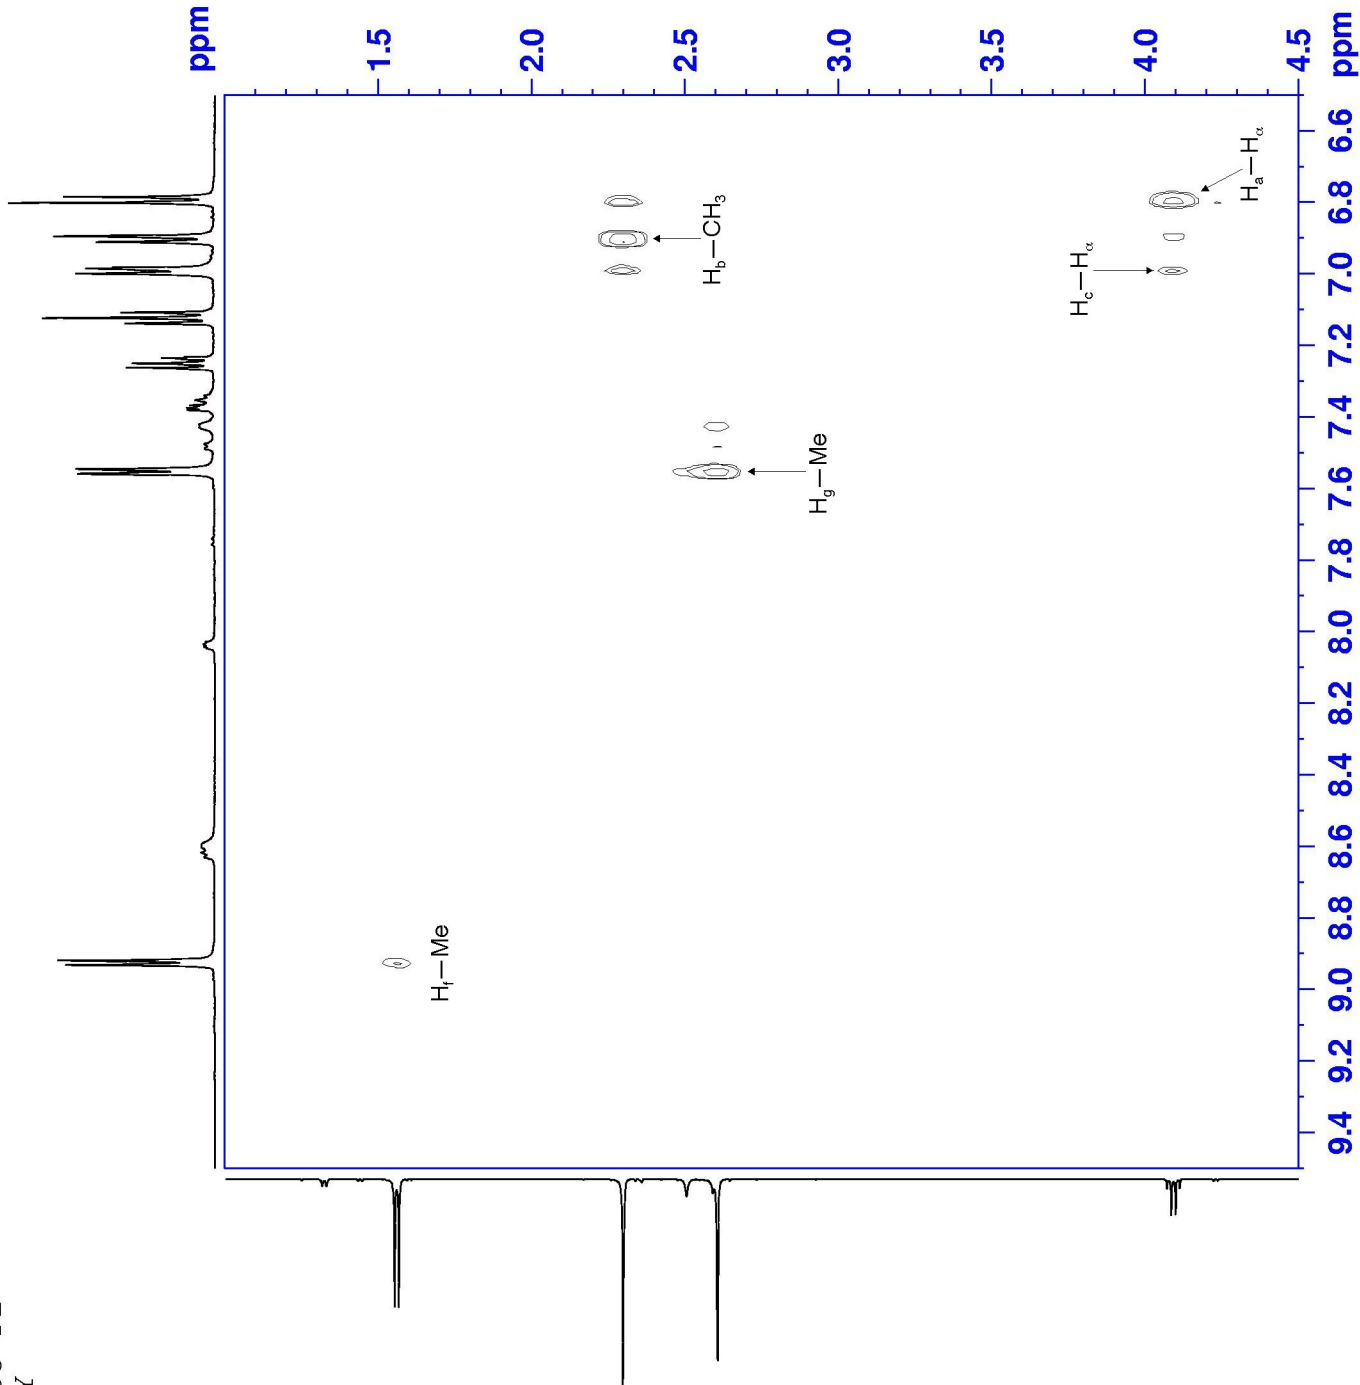

Current Data Parameters  
 NAME 11C-233-PC  
 EXPNO 5  
 PROCNO 1

F2 - Acquisition Parameters  
 Date\_ 20040309  
 Time 21.37  
 INSTRUM drx500  
 PROBHD 5 mm Multinucl  
 PULPROG noesyph  
 TD 2048  
 SOLVENT CDCl<sub>3</sub>  
 NS 16  
 DS 4  
 SWH 5733.945 Hz  
 FIDRES 2.799778 Hz  
 AQ 0.1786356 sec  
 RG 80.6  
 DW 87.200 usec  
 DE 6.00 usec  
 TE 295.7 K  
 G0 0.00007409 sec  
 D1 2.10198998 sec  
 D8 2.00000000 sec  
 INO 0.00017440 sec  
 MCREST 0.00000000 sec  
 MCWRK 1.05099499 sec  
 STCNT 128

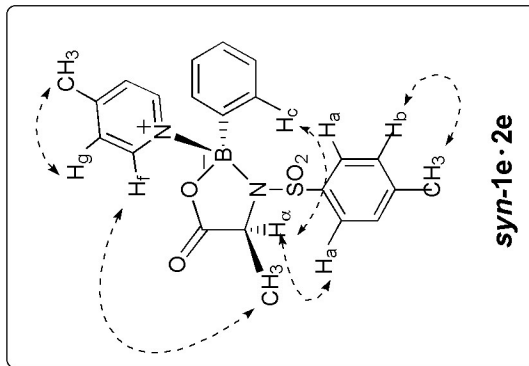

Current Data Parameters  
 NAME 11C-233-PC  
 EXPNO 5  
 PROCNO 1

F2 - Acquisition Parameters  
 Date\_ 20040309  
 Time 21.37  
 INSTRUM drx500  
 PROBHD 5 mm Multinucl  
 PULPROG noesyph  
 ID 2048  
 SOLVENT CDCl3  
 NS 16  
 DS 4  
 SWH 5733.945 Hz  
 FIDRES 2.799778 Hz  
 AQ 0.1786356 sec  
 RG 80.6  
 DW 87.200 usec  
 DE 6.00 usec  
 TE 295.7 K  
 d0 0.00007409 sec  
 d1 2.10198998 sec  
 d8 2.00000000 sec  
 INO 0.00017440 sec  
 MCREST 0.00000000 sec  
 MCWRK 1.05099499 sec  
 STCNT 128

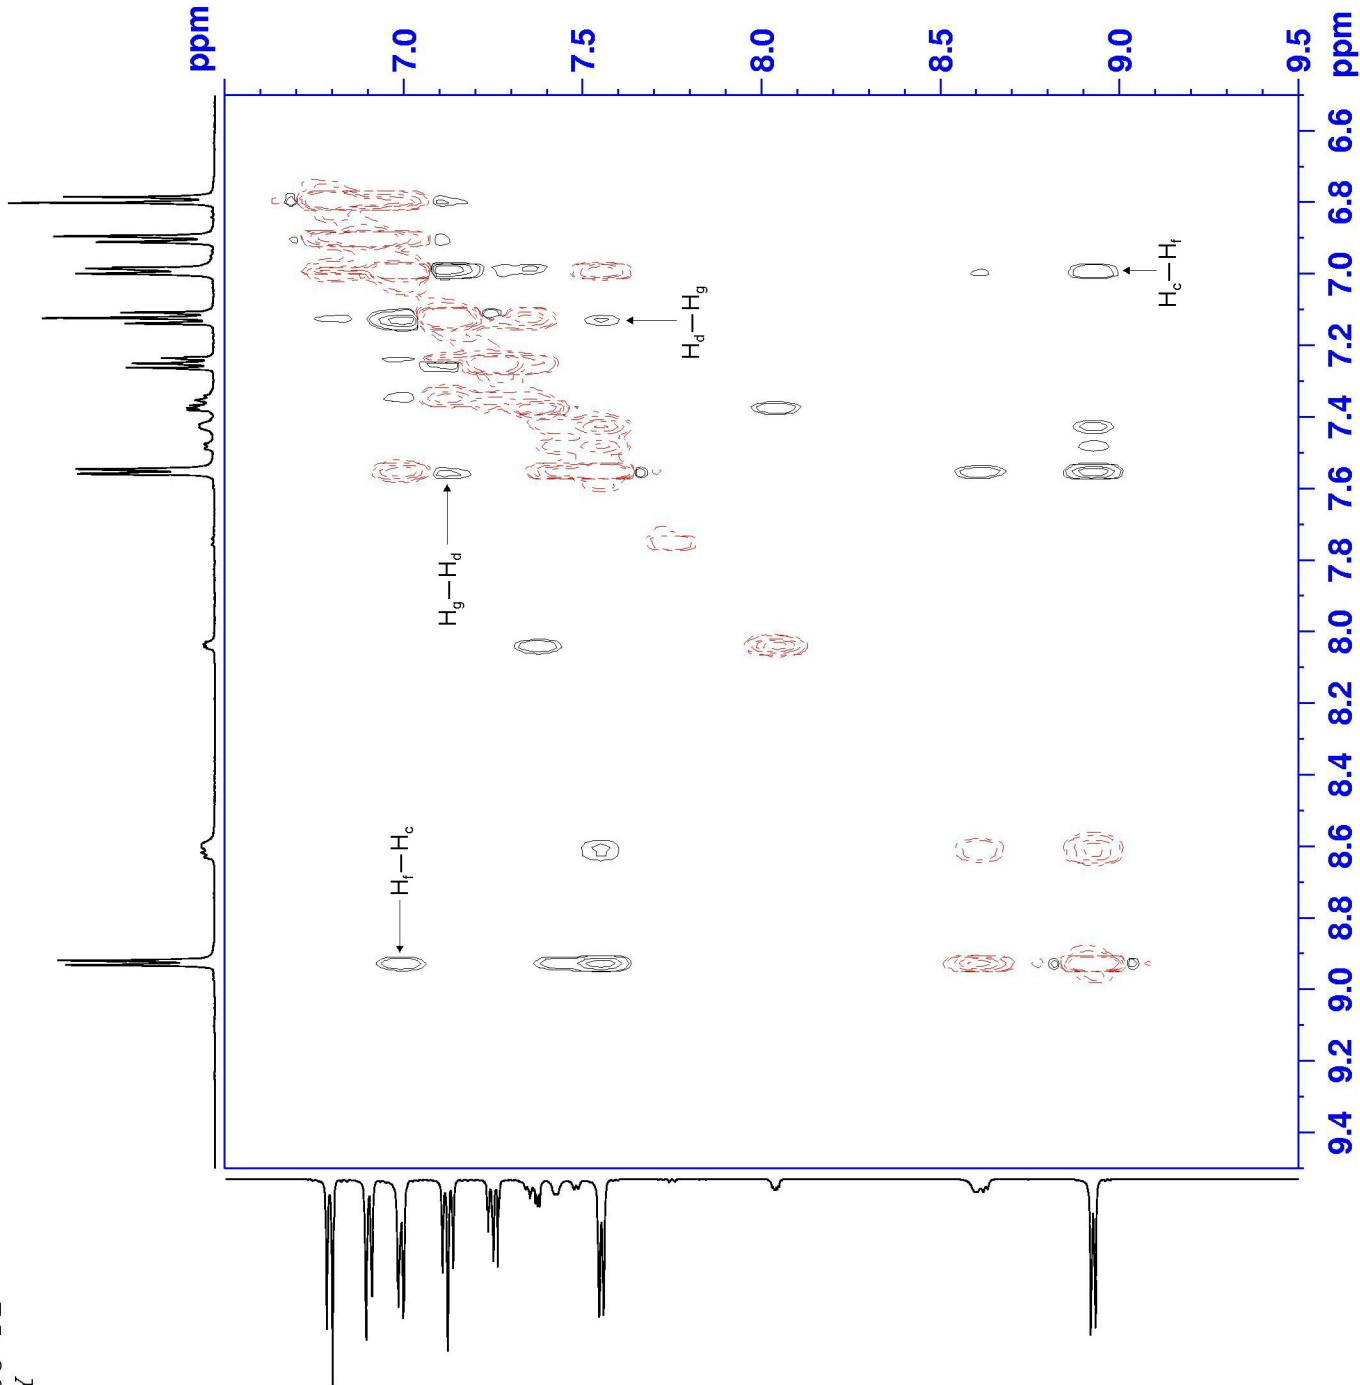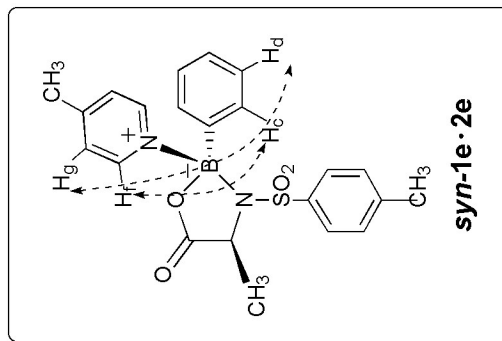

Supplement: b413370f-10.pdf [file b413370f-10.pdf]
