# Supplementary material for: High facial selectivity observed in amine coordination to chiral oxazaborolidinones
Source: Royal Society of Chemistry journal article supplement (doi:10.1039/b413370f), 2004-12-16

Current Data Parameters  
 NAME 11C-202-PB  
 EXPNO 1  
 PROCNO 1

F2 - Acquisition Parameters  
 Date\_ 20030917  
 Time 21.20  
 INSTRUM OFX500  
 PROBHD 5 mm Multinucl  
 PULPROG zg30  
 TD 65536  
 SOLVENT CDCl3  
 NS 16  
 DS 2  
 SMH 10330.578 Hz  
 FIDRES 0.157632 Hz  
 AQ 3.1719923 sec  
 RG 128  
 DW 48.400 usec  
 DE 6.00 usec  
 TE 296.3 K  
 D1 1.0000000 sec  
 MCREST 0.0000000 sec  
 MCMRK 0.01500000 sec

\*\*\*\*\* CHANNEL f1 \*\*\*\*\*  
 NUC1 1H  
 P1 10.30 usec  
 PL1 -6.00 dB  
 SFO1 500.1330885 MHz

F2 - Processing parameters  
 SI 32768  
 SF 500.1300129 MHz  
 MDW EM  
 SSB 0  
 LB 0.30 Hz  
 GB 0  
 PC 1.00

1D NMR plot parameters  
 CX 24.00 cm  
 CY 0.00 cm  
 F1P 9.564 ppm  
 F1 4783.31 Hz  
 F2P 0.564 ppm  
 F2 282.14 Hz  
 PPMCM 0.37500 ppm/cm  
 HZCM 187.54675 Hz/cm

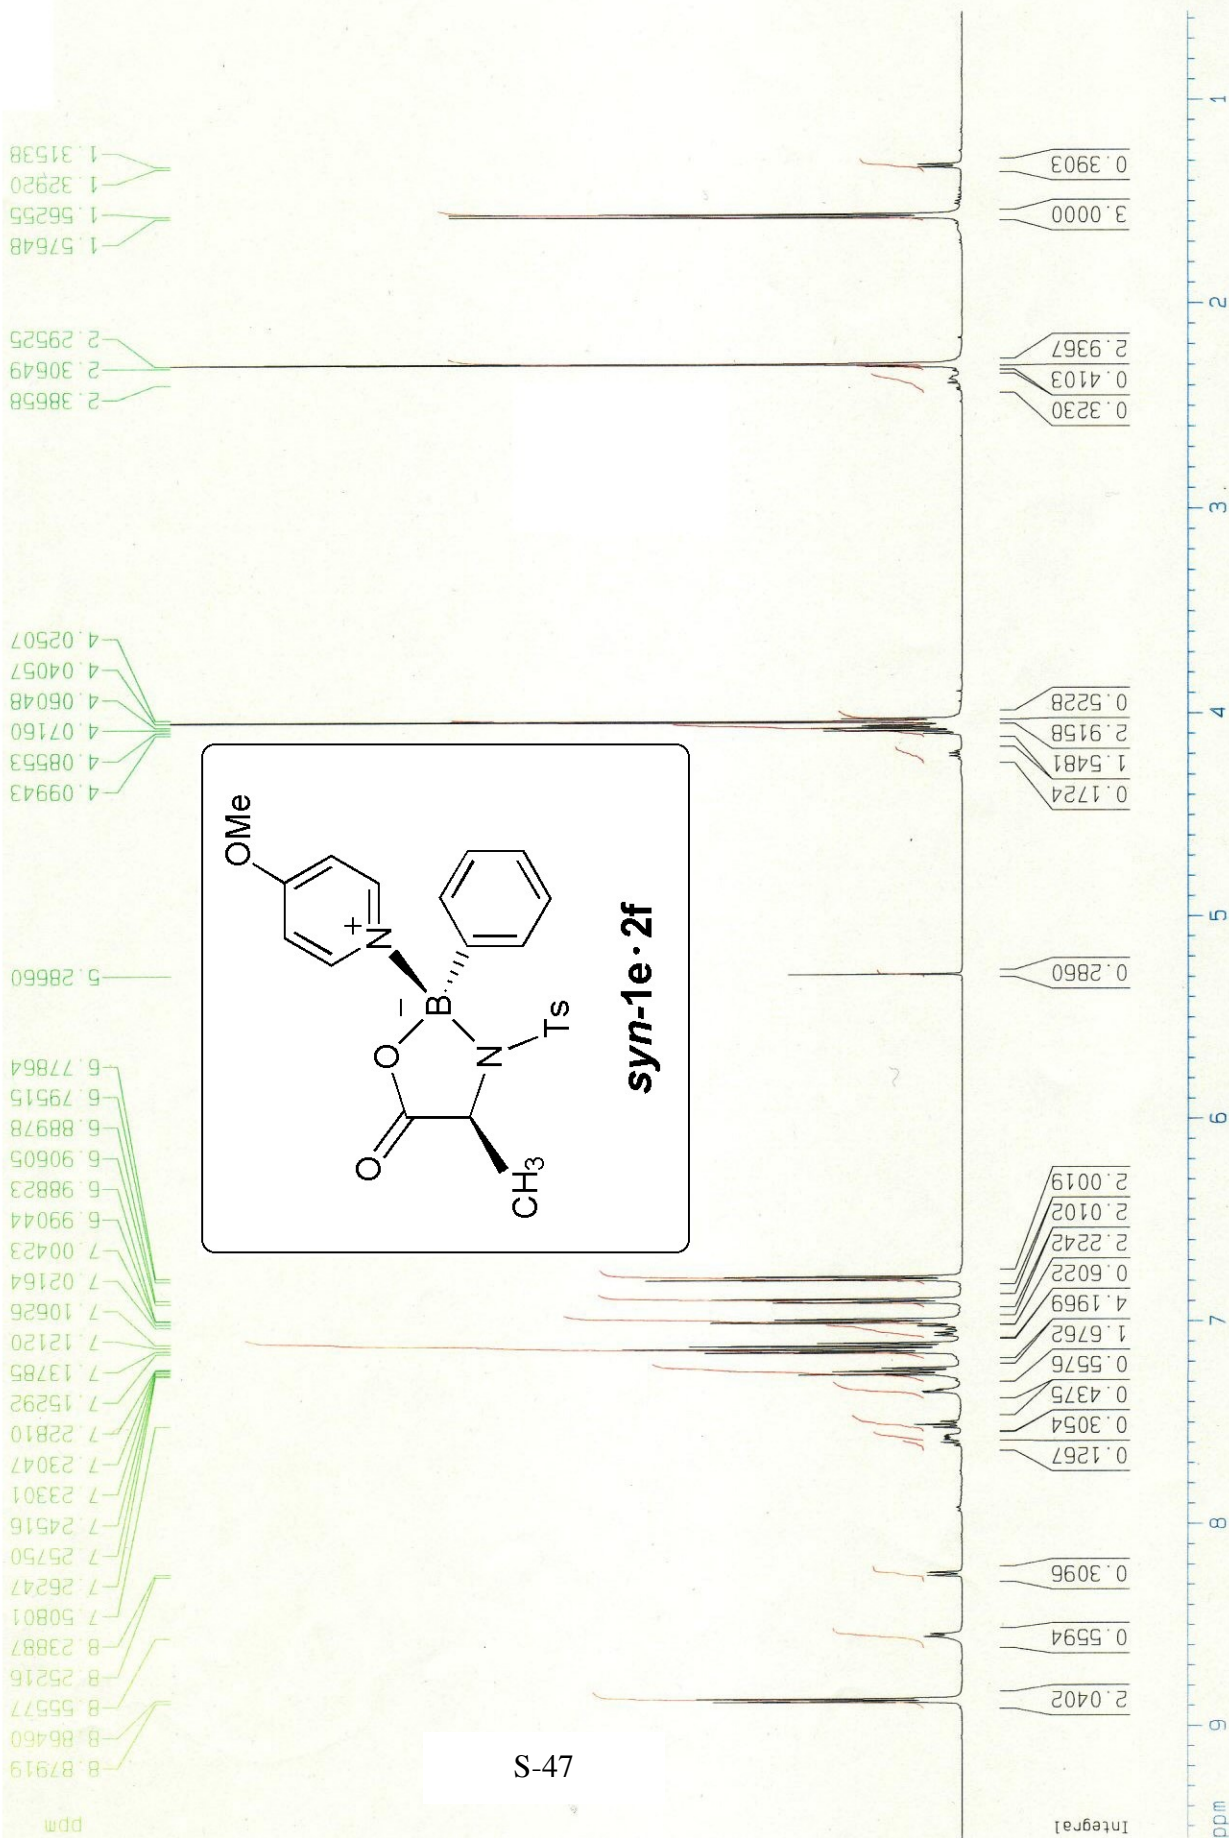

11C-202-PB  
4-methoxyppyridine  
NOESY

Current Data Parameters  
 NAME 11C-202-PB  
 EXPNO 5  
 PROCNO 1

F2 - Acquisition Parameters  
 Date\_ 20030917  
 Time 21.37  
 INSTRUM drx500  
 PROBHD 5 mm Multinucl  
 PULPROG noesyph  
 TD 2048  
 SOLVENT CDCl3  
 NS 16  
 DS 4  
 SWH 6313.131 Hz  
 FIDRES 3.082584 Hz  
 AQ 0.1622516 sec  
 RG 90.5  
 DW 79.200 usec  
 DE 6.00 usec  
 TE 296.2 K  
 g0 0.00006609 sec  
 D1 2.00040889 sec  
 D8 2.00000000 sec  
 INO 0.00015840 sec  
 MCREST 0.00000000 sec  
 MCWRK 1.00020444 sec  
 STCNT 128

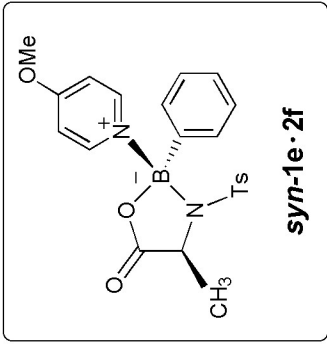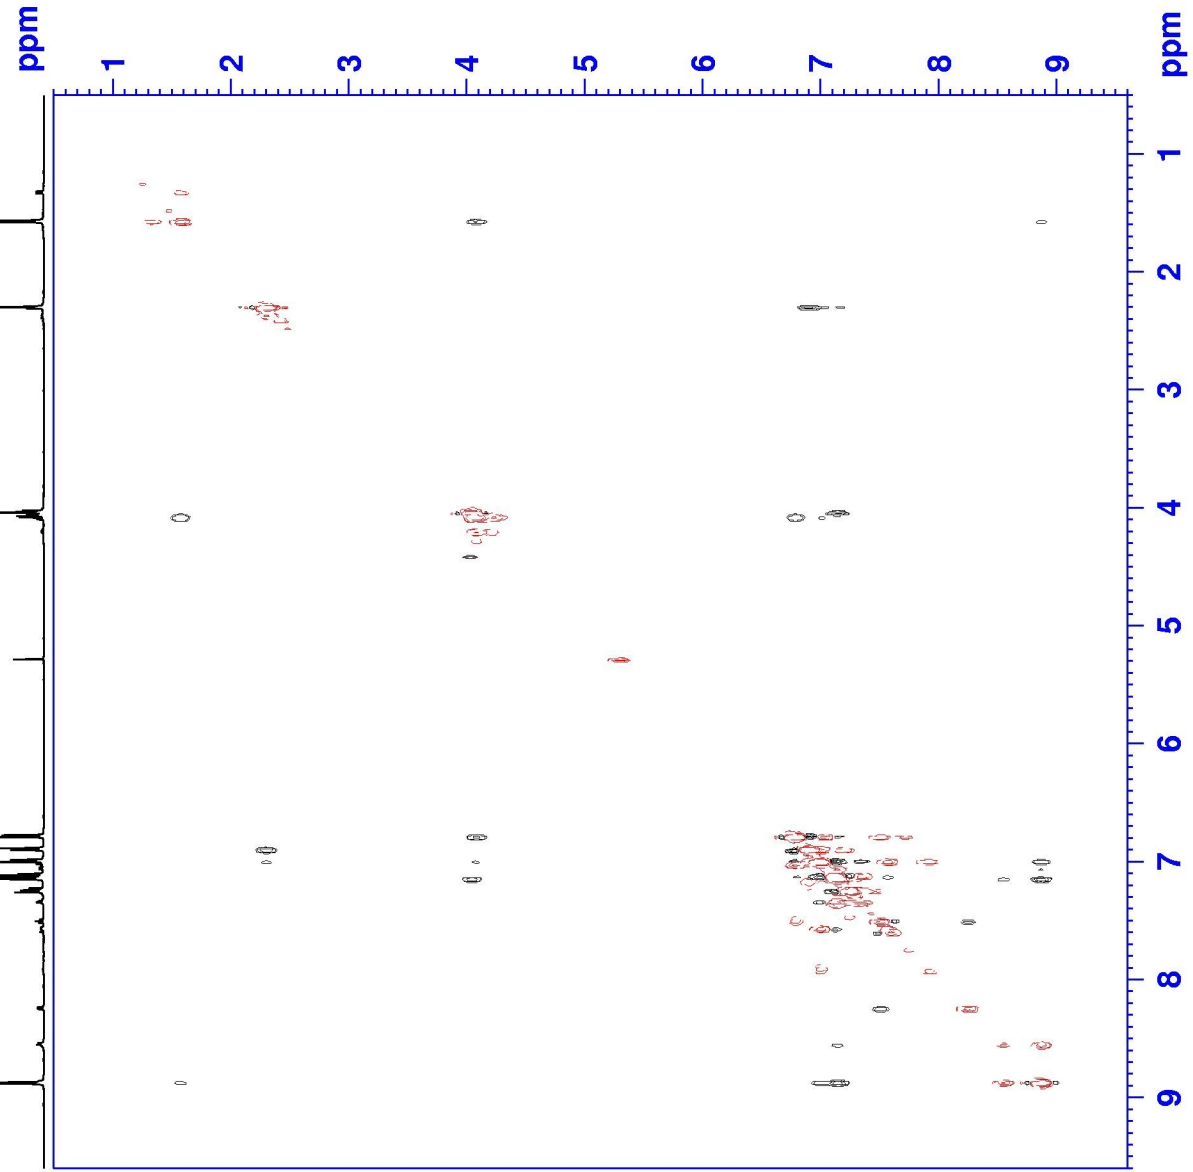

11C-202-PB  
4-methoxyppyridine  
NOESY

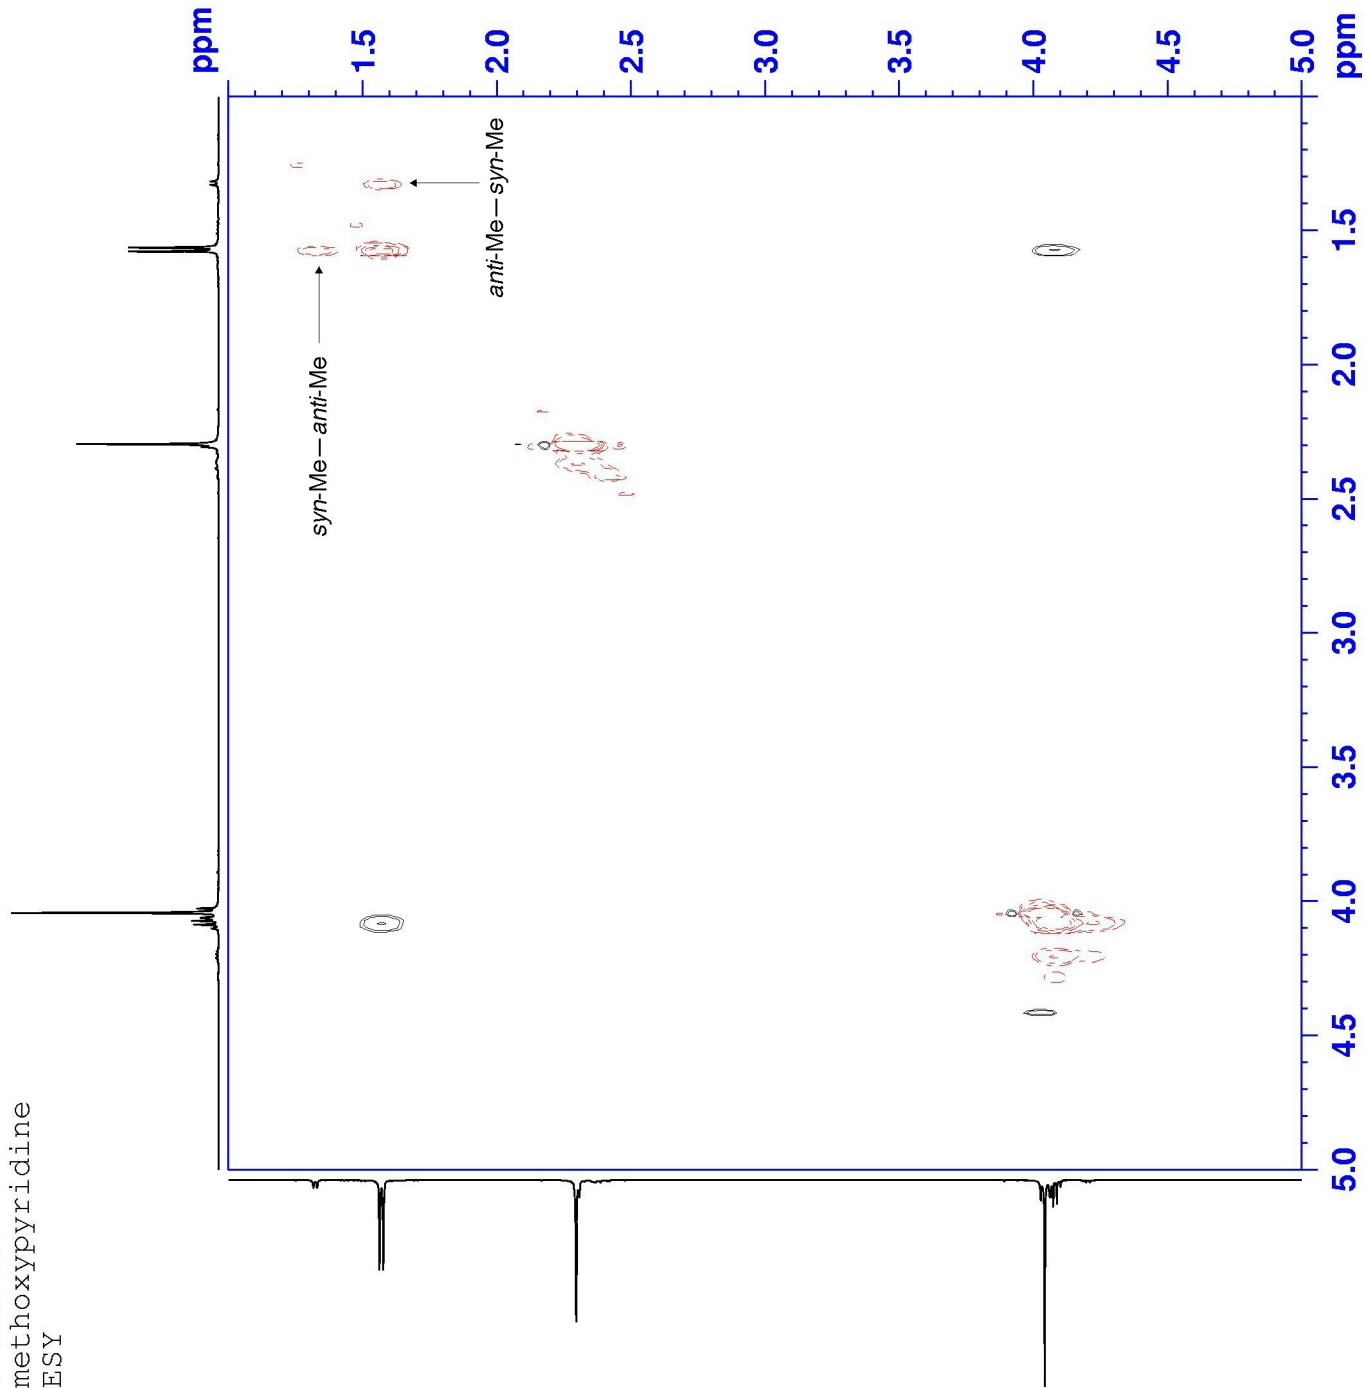

Current Data Parameters  
 NAME 11C-202-PB  
 EXNO 5  
 PROGNO 1

F2 - Acquisition Parameters  
 Date\_ 20030917  
 Time 21.37  
 INSTRUM drx500  
 PROBHD 5 mm Multinucl  
 PULPROG noesyph  
 TD 2048  
 SOLVENT CDCl3  
 NS 16  
 DS 4  
 SWH 6313.131 Hz  
 FIDRES 3.082584 Hz  
 AQ 0.1622516 sec  
 RG 90.5  
 DW 79.200 usec  
 DE 6.00 usec  
 TE 296.2 K  
 g0 0.00006609 sec  
 D1 2.00040889 sec  
 D8 2.00000000 sec  
 INO 0.00015840 sec  
 MCREST 0.00000000 sec  
 MCWRK 1.00020444 sec  
 STCNT 128

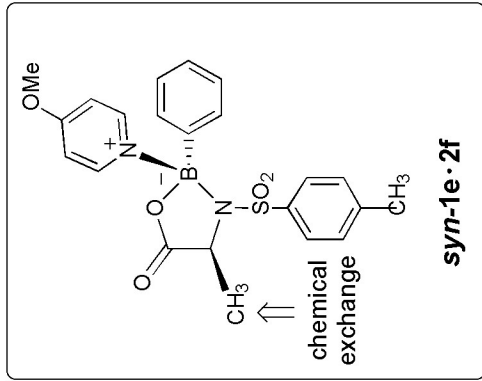

11C-202-PB  
4-methoxyppyridine  
NOESY

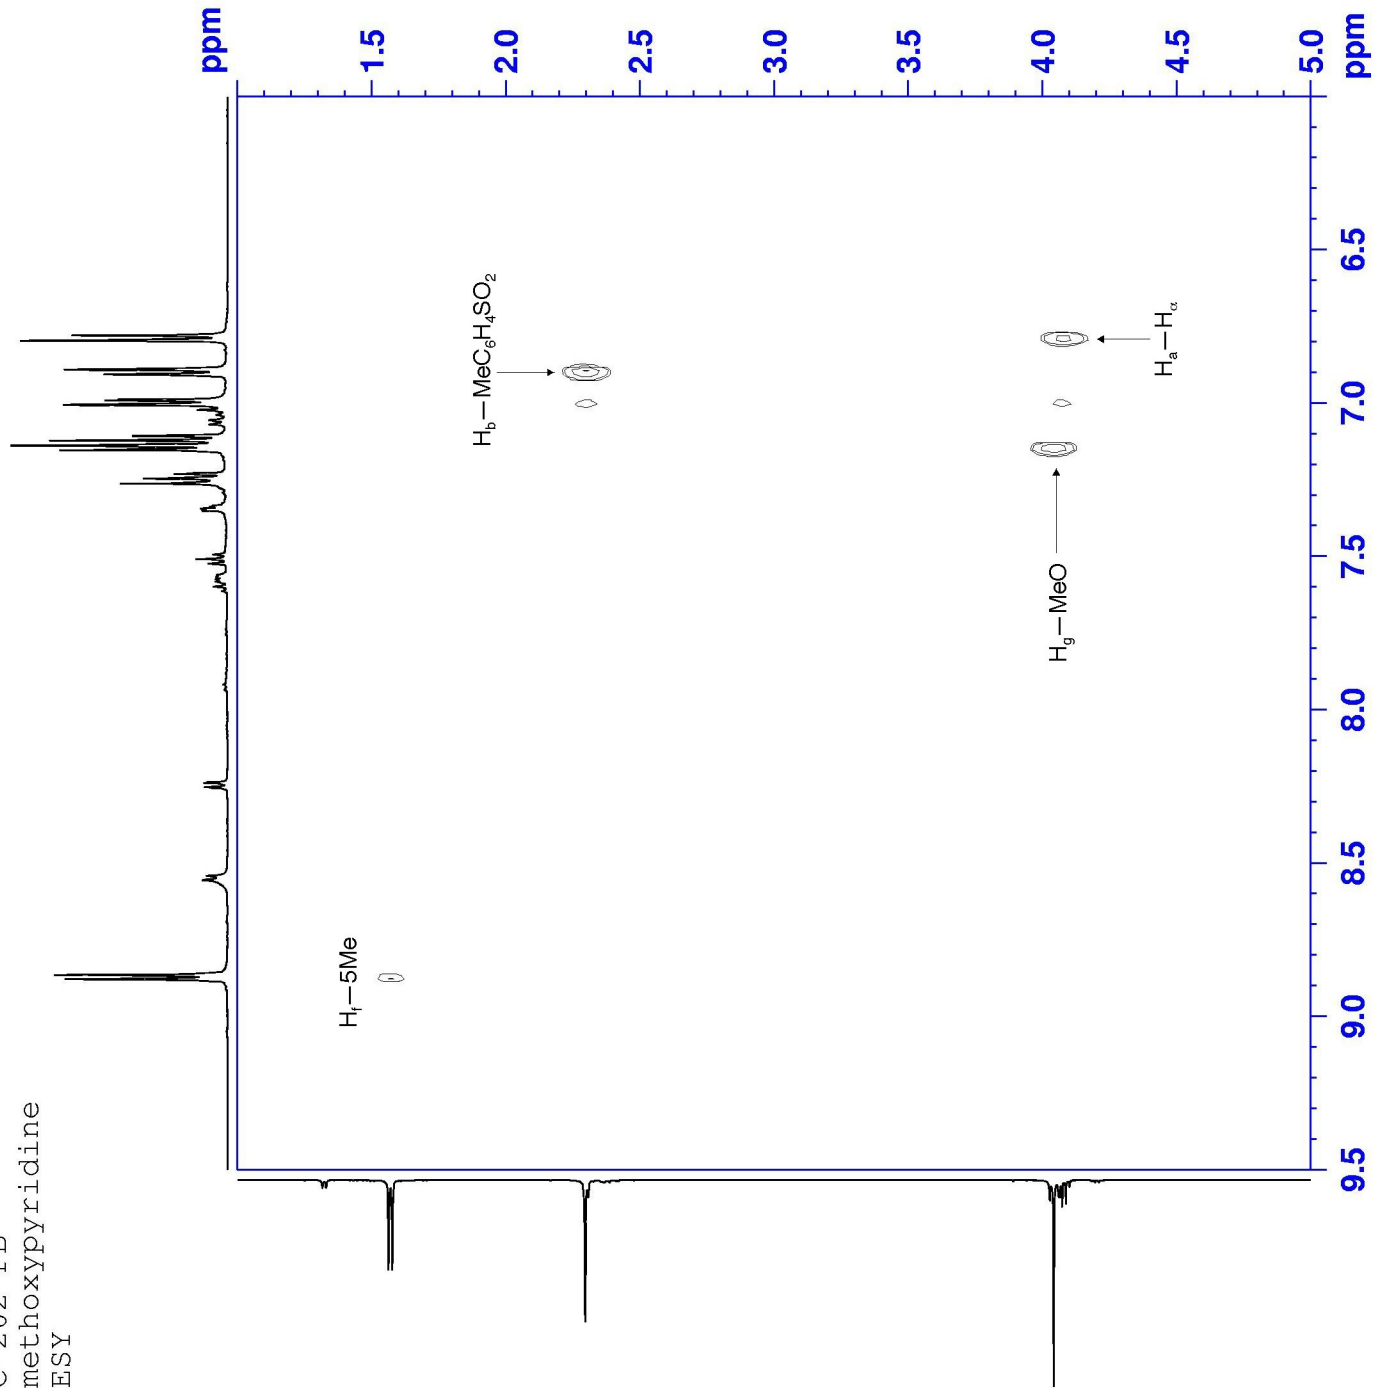

Current Data Parameters  
 NAME 11C-202-PB  
 EXPNO 5  
 PROCNO 1

F2 - Acquisition Parameters  
 Date\_ 20030917  
 Time 21.37  
 INSTRUM drx500  
 PROBHD 5 mm Multinucl  
 PULPROG noesyph  
 TD 2048  
 SOLVENT CDCl3  
 NS 16  
 DS 4  
 SWH 6313.131 Hz  
 FIDRES 3.082584 Hz  
 AQ 0.1622516 sec  
 RG 90.5  
 DW 79.200 usec  
 DE 6.00 usec  
 TE 296.2 K  
 g0 0.00006609 sec  
 D1 2.00040889 sec  
 D8 2.00000000 sec  
 INO 0.00015840 sec  
 MCREST 0.00000000 sec  
 MCWRK 1.00020444 sec  
 STICNT 128

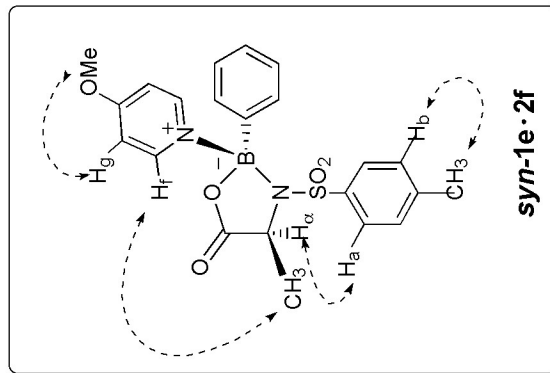

11C-202-PB  
4-methoxyppyridine  
NOESY

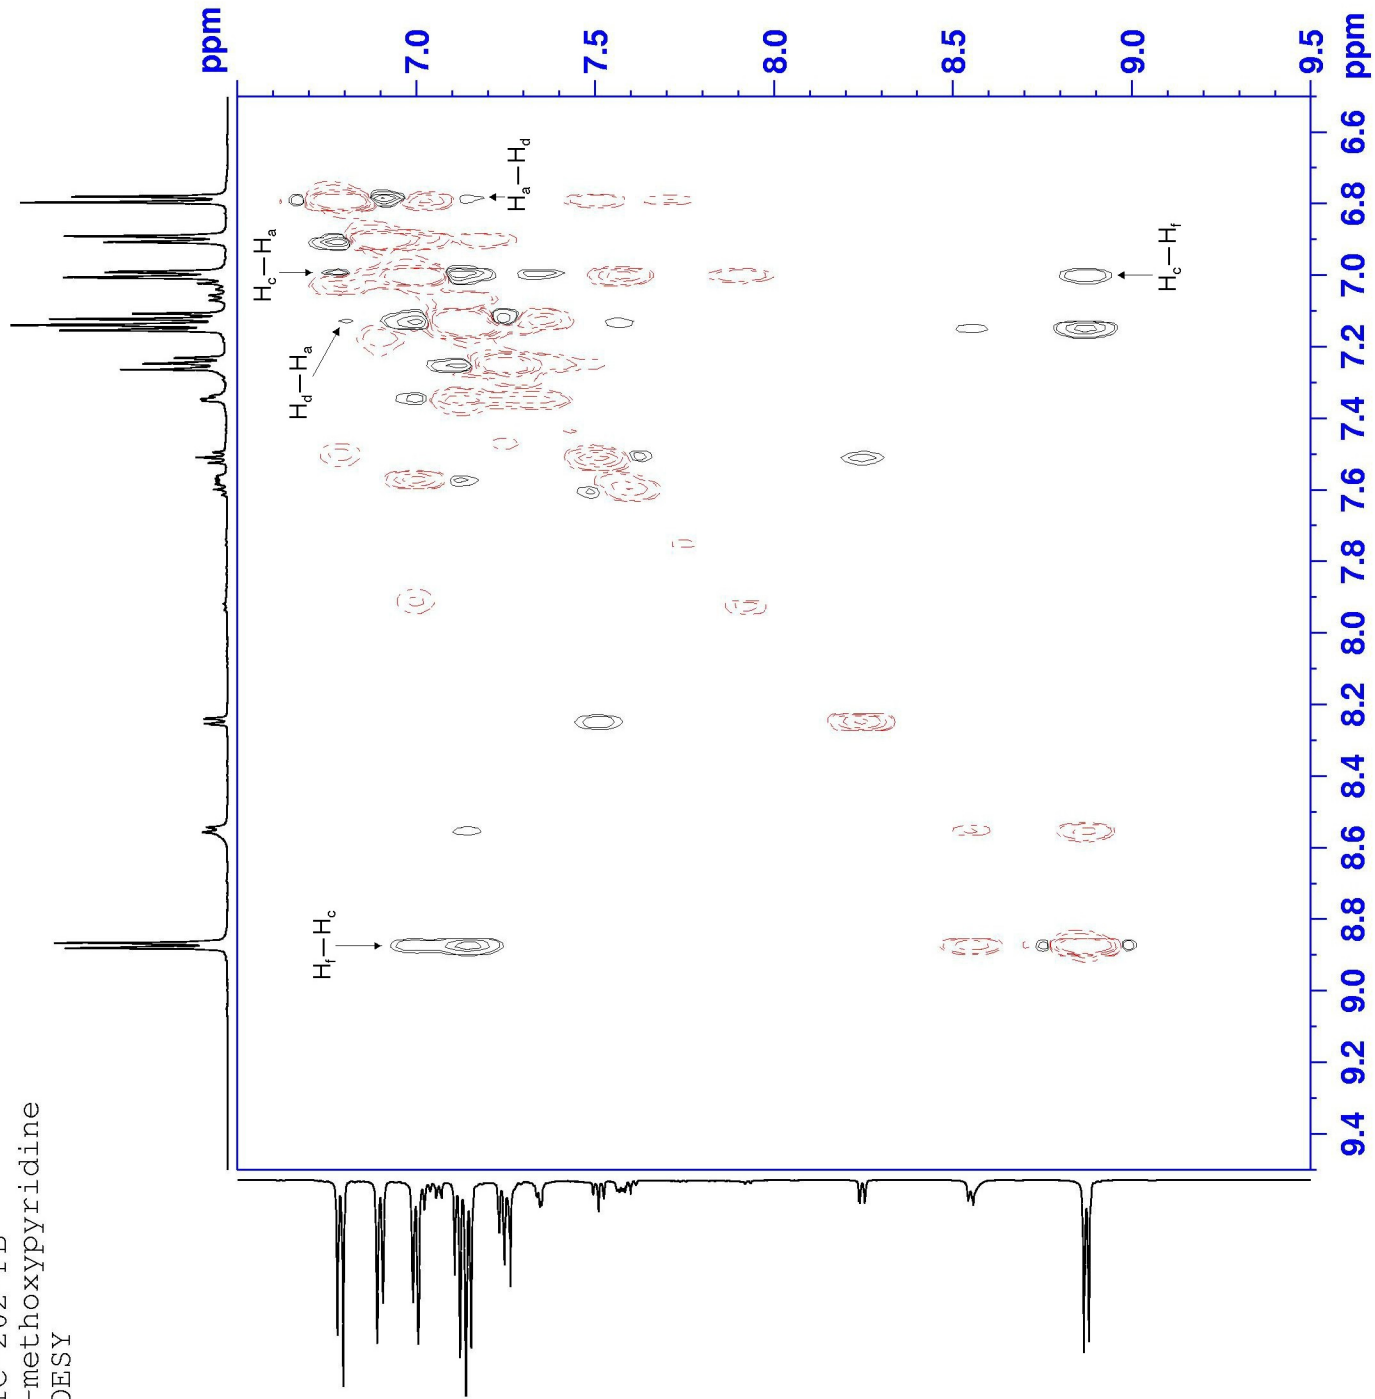

Current Data Parameters  
 NAME 11C-202-PB  
 EXNO 5  
 PROCNO 1

F2 - Acquisition Parameters  
 Date\_ 20030917  
 Time 21.37  
 INSTRUM drx500  
 PROBHD 5 mm Multinucl  
 PULPROG noesyph  
 TD 2048  
 SOLVENT CDCl3  
 NS 16  
 DS 4  
 SWH 6313.131 Hz  
 FIDRES 3.082584 Hz  
 AQ 0.1622516 sec  
 RG 90.5  
 DW 79.200 usec  
 DE 6.00 usec  
 TE 296.2 K  
 d0 0.00006609 sec  
 D1 2.00040889 sec  
 D8 2.00000000 sec  
 INO 0.00015840 sec  
 MCREST 0.00000000 sec  
 MCWRK 1.00020444 sec  
 STCNT 128

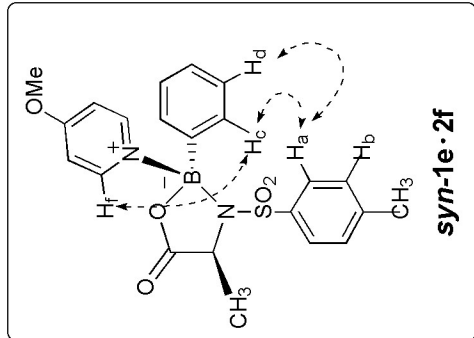

Supplement: b413370f-11.pdf [file b413370f-11.pdf]
