# Supplementary material for: High facial selectivity observed in amine coordination to chiral oxazaborolidinones
Source: Royal Society of Chemistry journal article supplement (doi:10.1039/b413370f), 2004-12-16

11C-239-PB  
Ala-Tf-OXB  
Pyridine (1.0 equiv)  
1 h

```
Current Data Parameters
NAME      11C-239-PB
EXPNO    1
PROCNO   1

F2 - Acquisition Parameters
Date_    20040317
Time     21.12
INSTRUM  drx500
PROBHD   5 mm Multinucl
PULPROG  zg30
TD        65536
SOLVENT  CDCl3
NS        16
DS        2
SWH      10330.578 Hz
FIDRES   0.157632 Hz
AQ        3.1719923 sec
RG         362
DW        48.400 usec
DE         6.00 usec
TE        296.1 K
D1        1.00000000 sec
MCREST    0.00000000 sec
MCWRK     0.01500000 sec

===== CHANNEL f1 =====
NUC1      1H
P1        10.30 usec
PL1       -6.00 dB
SFO1      500.1330885 MHz

F2 - Processing parameters
SI         32768
SF         500.1300129 MHz
WDW        EM
SSB        0
LB         0.30 Hz
GB         0
PC         1.00
```

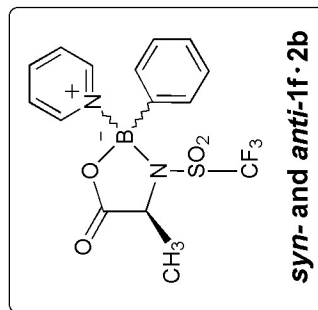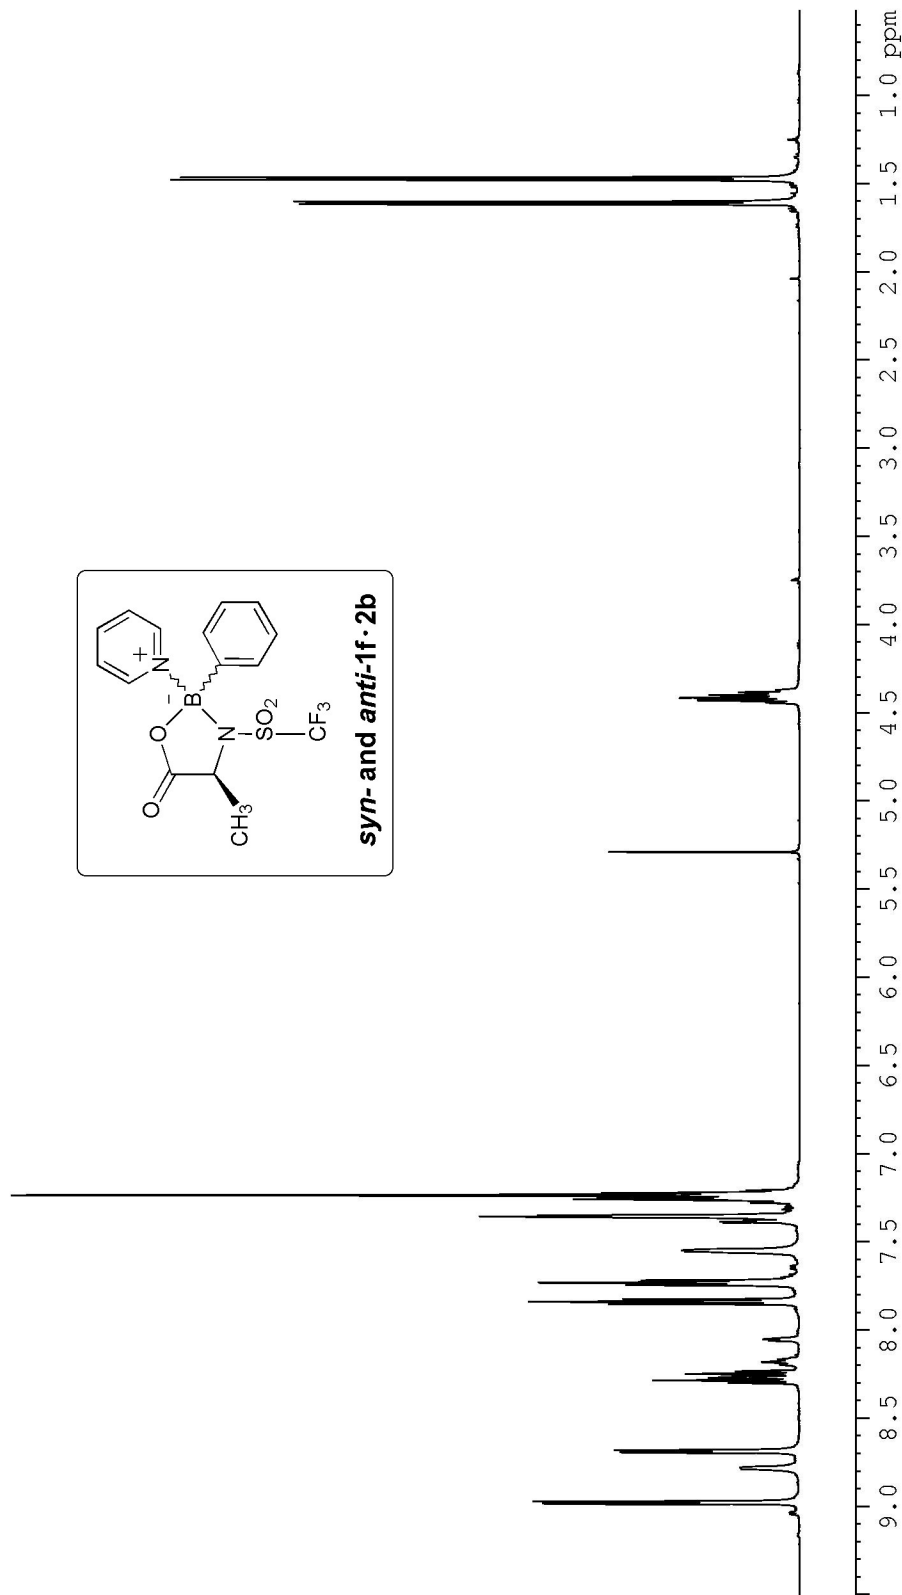

11C-239-PB  
NOESY

Current Data Parameters  
NAME 11C-239-PB  
EXPNO 5  
PROCNO 1

F2 - Acquisition Parameters  
Date\_ 20040317  
Time 21.23  
INSTRUM drx500  
PROBHD 5 mm Multinucl  
PULPROG noesyph  
TD 2048  
SOLVENT CDC13  
NS 16  
DS 4  
SWH 5836.227 Hz  
FIDRES 2.879017 Hz  
AQ 0.1737204 sec  
RG 114  
DW 84.800 usec  
DE 6.00 usec  
TE 296.1 K  
G0 0.00007169 sec  
D1 2.10608602 sec  
D8 2.00000000 sec  
INO 0.00016960 sec  
MCREST 0.00000000 sec  
MCWRK 1.05304301 sec  
STCNT 128

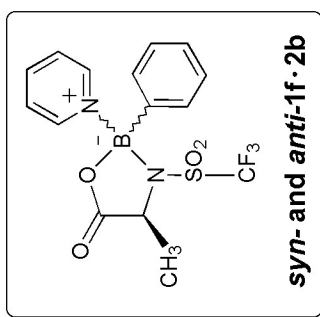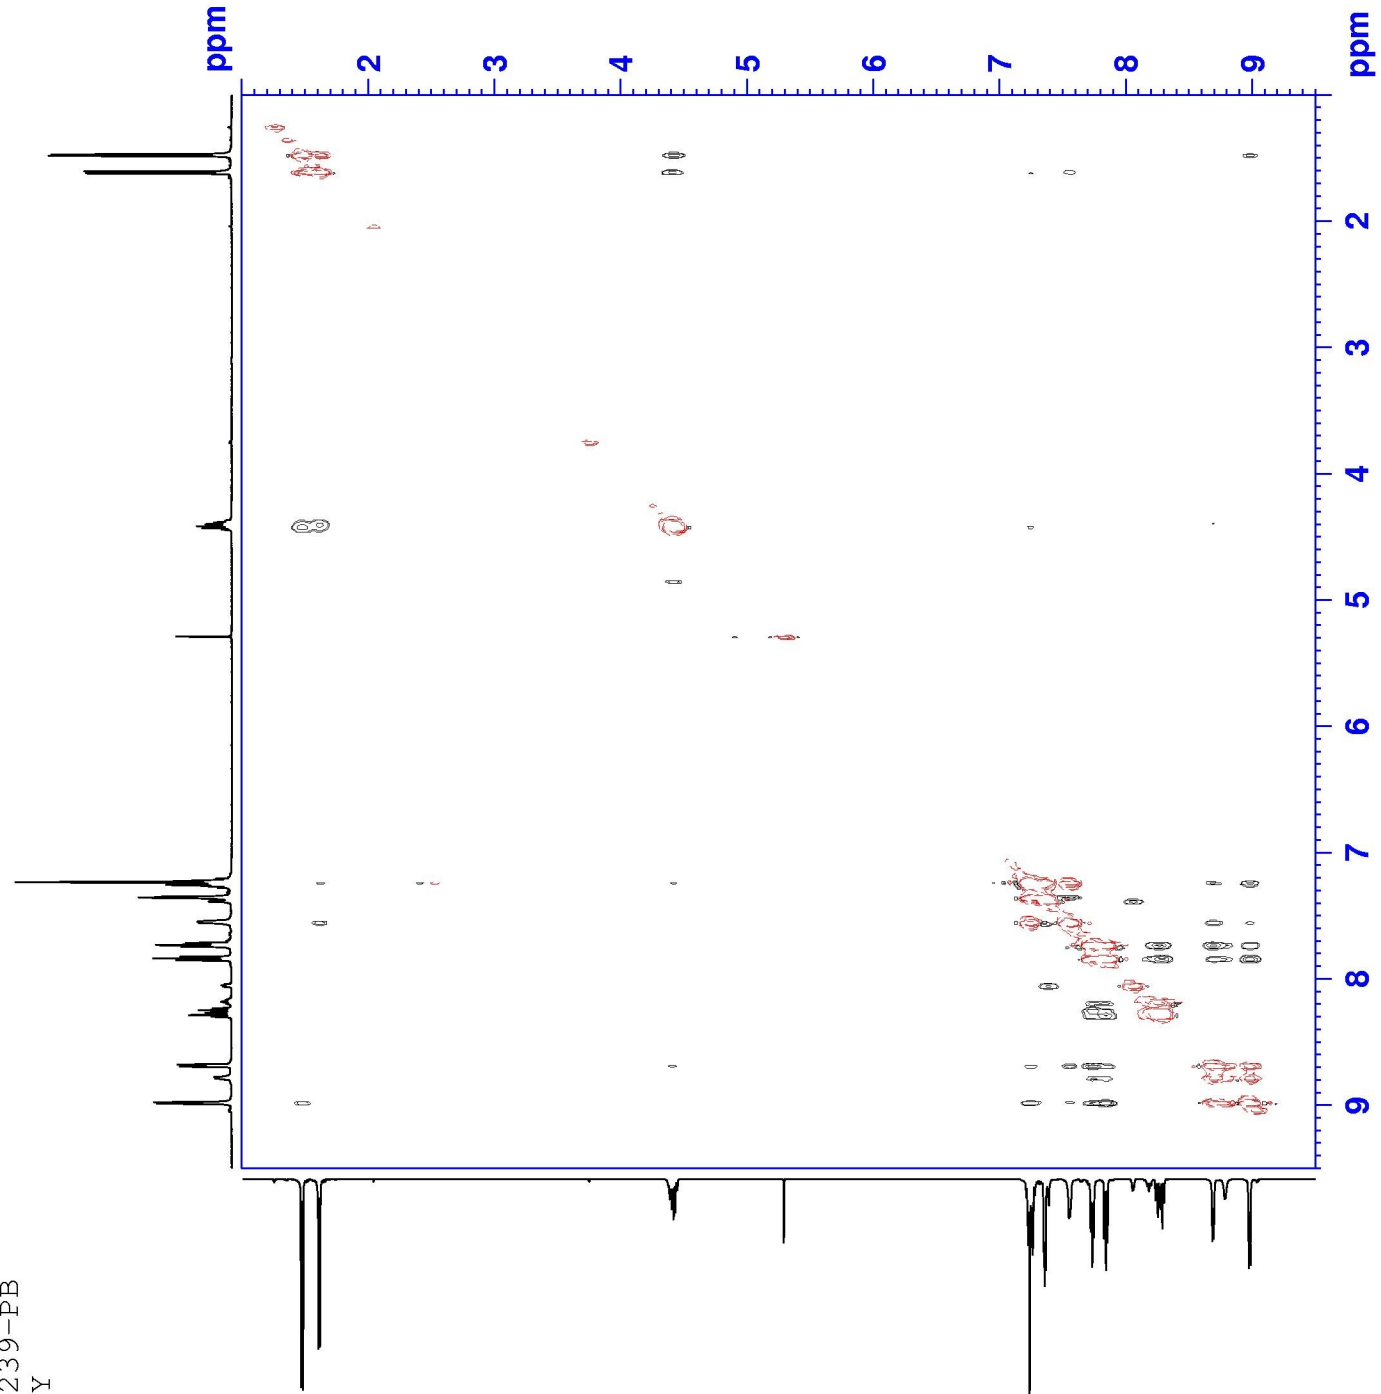

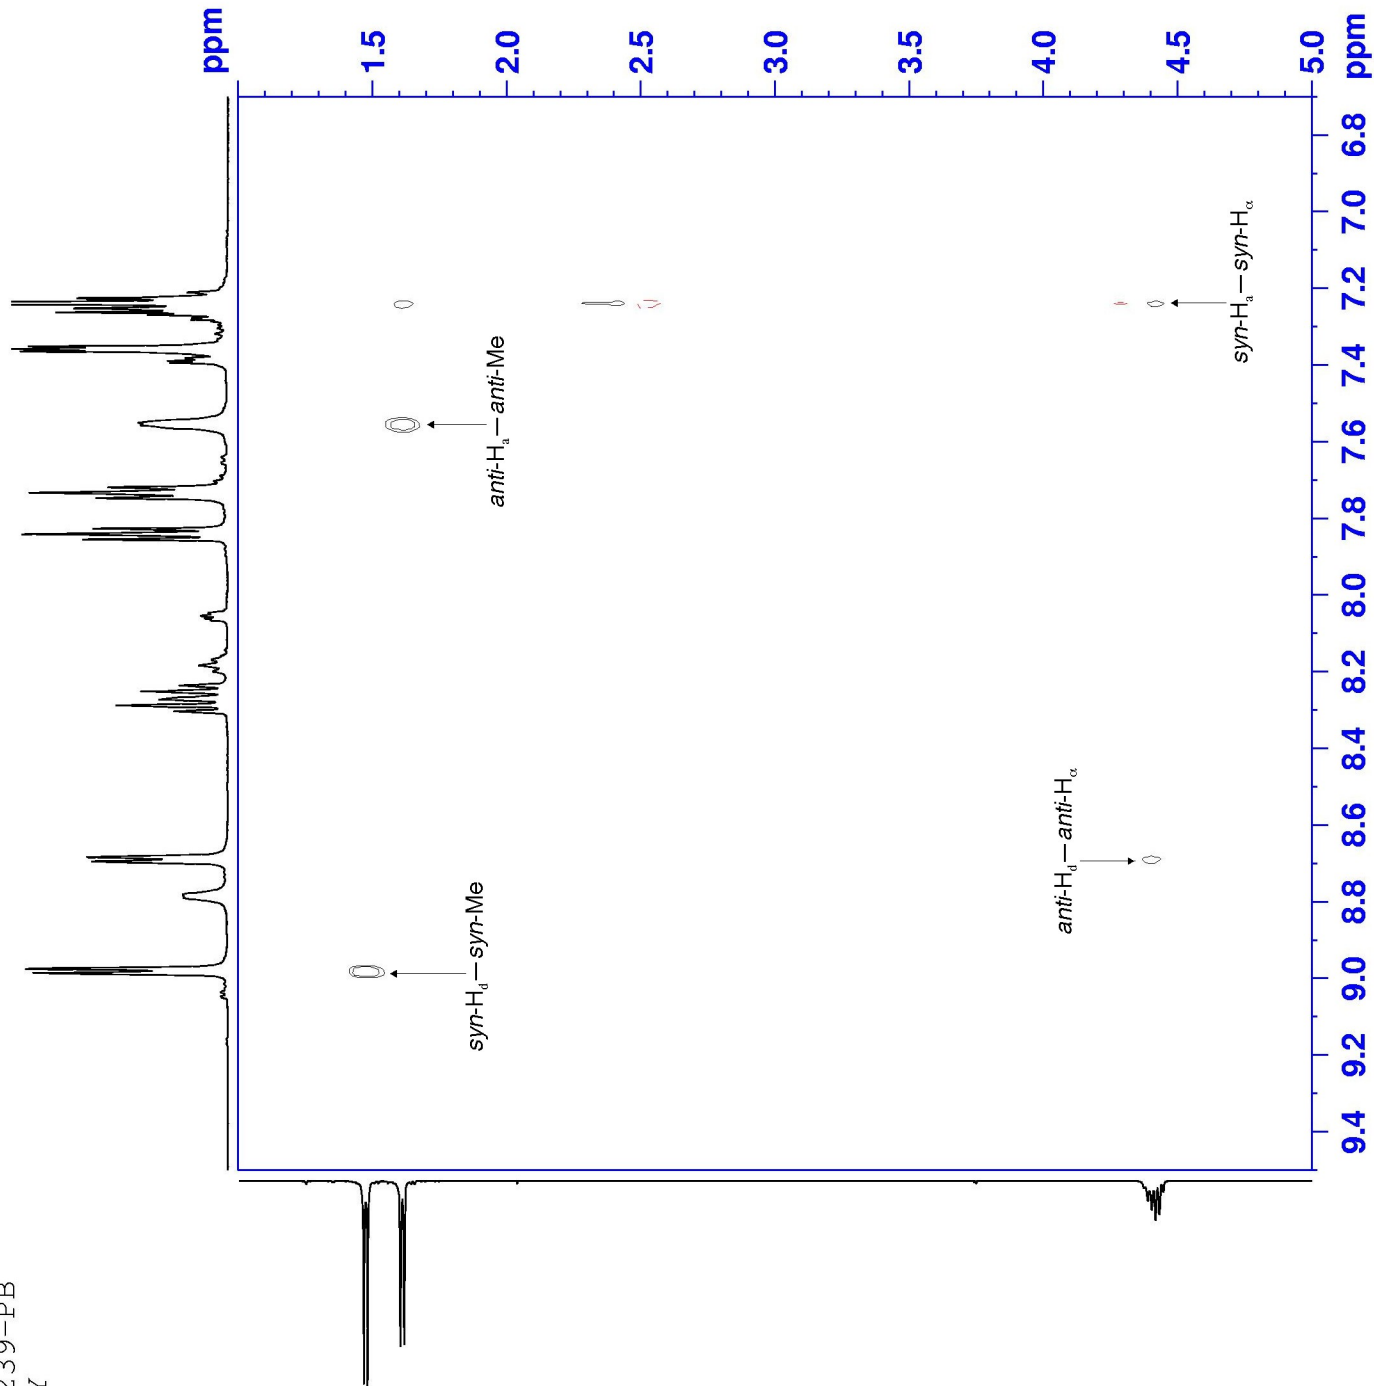

Current Data Parameters  
 NAME 11C-239-PB  
 EXPNO 5  
 PROCNO 1

F2 - Acquisition Parameters  
 Date\_ 20040317  
 Time 21.23  
 INSTRUM drx500  
 PROBHD 5 mm Multinucl  
 PULPROG noesyph  
 TD 2048  
 SOLVENT CDCl3  
 NS 16  
 DS 4  
 SWH 5896.227 Hz  
 FIDRES 2.879017 Hz  
 AQ 0.1737204 sec  
 RG 114  
 DW 84.800 usec  
 DE 6.00 usec  
 TE 296.1 K  
 GQ 0.00007169 sec  
 D1 2.10608602 sec

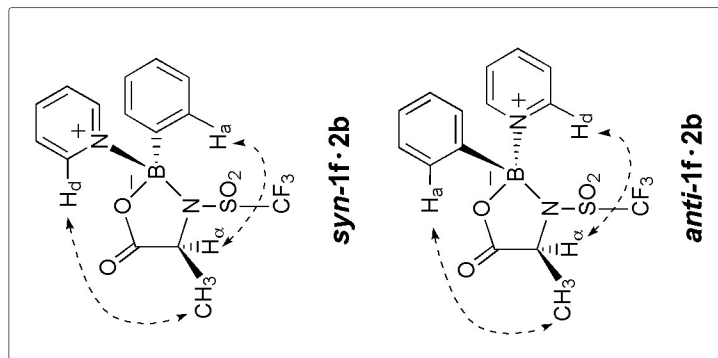

Current Data Parameters  
 NAME 11C-239-PB  
 EXPNO 5  
 PROCNO 1

F2 - Acquisition Parameters  
 Date\_ 20040317  
 Time 21.23  
 INSTRUM drx500  
 PROBHD 5 mm Multinucl  
 PULPROG noesyph  
 ID 2048  
 SOLVENT CDCl3  
 NS 16  
 DS 4  
 SWH 5896.227 Hz  
 FIDRES 2.879017 Hz  
 AQ 0.1737204 sec  
 RG 114  
 DW 84.800 usec  
 DE 6.00 usec  
 TE 296.1 K  
 g0 0.00007169 sec  
 D1 2.10608602 sec  
 D8 2.00000000 sec  
 INO 0.00016960 sec  
 MCREST 0.00000000 sec  
 MCWRK 1.05304301 sec  
 STCNT 128

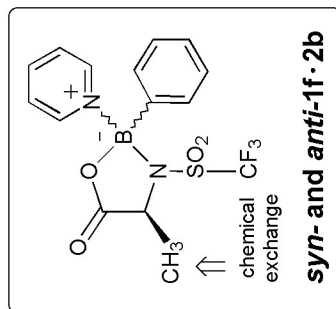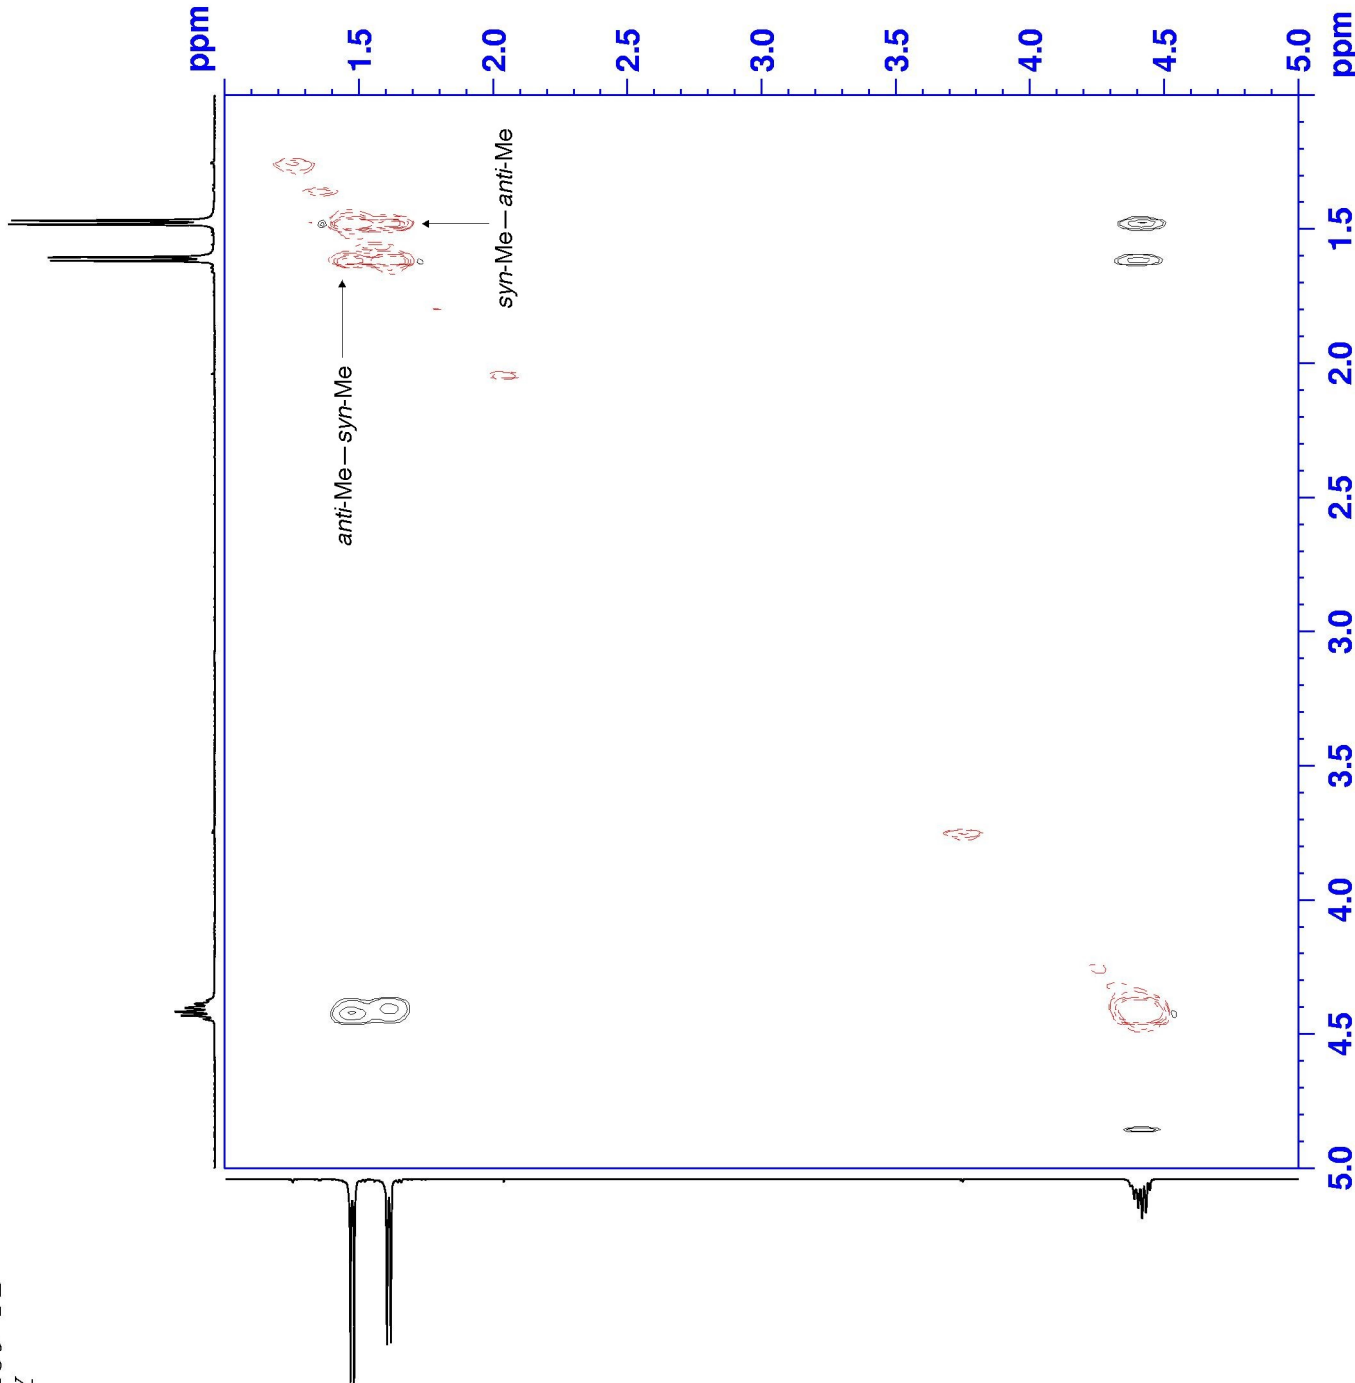

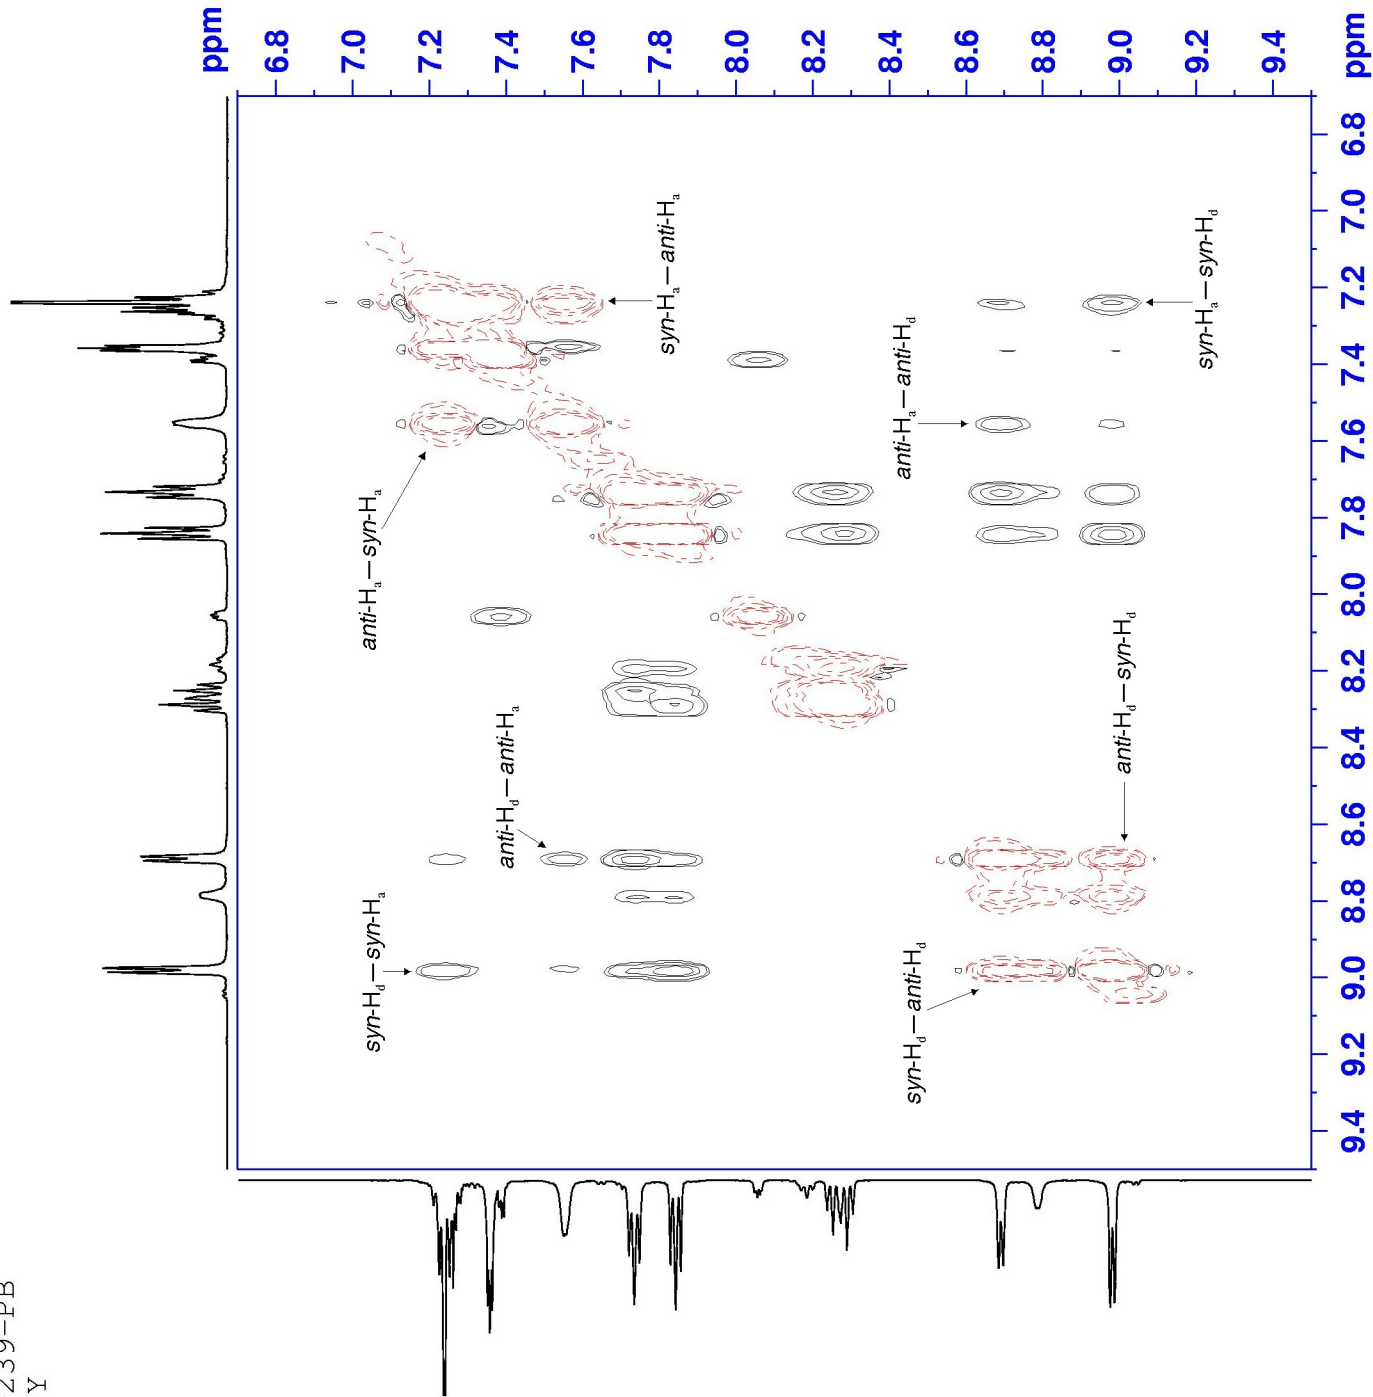

Current Data Parameters  
NAME 11C-239-PB  
EXPNO 5  
PROCNO 1

F2 - Acquisition Parameters  
Date\_ 20040317  
Time 21.23  
INSTRUM drx500  
PROBHD 5 mm Multinuc  
PULPROG noesyph  
ID 2048  
SOLVENT CDCl3  
NS 16  
DS 4  
SWH 5896.227 Hz  
FIDRES 2.879017 Hz  
AQ 0.1737204 sec  
RG 114  
DW 84.800 usec  
DE 6.00 usec  
TE 296.1 K  
d0 0.00007169 sec  
D1 2.10608602 sec  
D8 2.000000000 sec

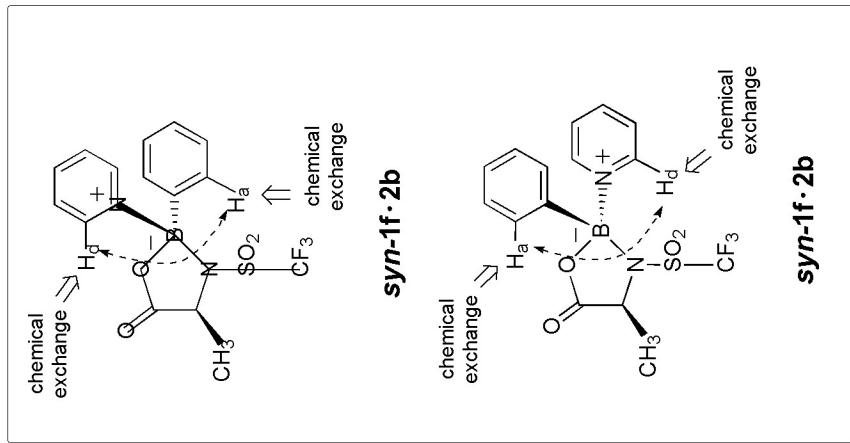

Supplement: b413370f-12.pdf [file b413370f-12.pdf]
