# Supplementary material for: High facial selectivity observed in amine coordination to chiral oxazaborolidinones
Source: Royal Society of Chemistry journal article supplement (doi:10.1039/b413370f), 2004-12-16
Supplement: b413370f-1.pdf [file b413370f-1.pdf]

**High Facial Selectivity Observed in Amine Coordination to Chiral Oxazaborolidinones**

Toshiro Harada, \* Yuuki Yamamoto and Takahiro Kusukawa

*Department of Chemistry and Materials Technology, Kyoto Institute of Technology,  
Matsugasaki, Sakyo-ku, Kyoto 606-8585, Japan.*

*harada@chem.kit.ac.jp*

**Table of Contents**

|                                                                                                           |      |
|-----------------------------------------------------------------------------------------------------------|------|
| General Procedure for Preparation and NMR Measurements of Amine-OXB Complexes                             | S-2  |
| <sup>1</sup> H NMR and NOESY Spectra of OXB-Amine Complex <b><i>syn-</i></b> and <b><i>anti-1a·2a</i></b> | S-8  |
| <sup>1</sup> H NMR and NOESY Spectra of OXB-Amine Complex <b><i>syn-1a·2b</i></b>                         | S-12 |
| <sup>1</sup> H NMR and NOESY Spectra of OXB-Amine Complex <b><i>syn-1a·2c</i></b>                         | S-16 |
| <sup>1</sup> H NMR and NOESY Spectra of OXB-Amine Complex <b><i>syn-1b·2b</i></b>                         | S-20 |
| <sup>1</sup> H NMR and NOESY Spectra of OXB-Amine Complex <b><i>syn-1c·2b</i></b>                         | S-24 |
| <sup>1</sup> H NMR and NOESY Spectra of OXB-Amine Complex <b><i>syn-1d·2b</i></b>                         | S-28 |
| <sup>1</sup> H NMR and NOESY Spectra of OXB-Amine Complex <b><i>syn-1e·2b</i></b>                         | S-33 |
| <sup>1</sup> H NMR and NOESY Spectra of OXB-Amine Complex <b><i>syn-1e·2d</i></b>                         | S-37 |
| <sup>1</sup> H NMR and NOESY Spectra of OXB-Amine Complex <b><i>syn-1e·2e</i></b>                         | S-42 |
| <sup>1</sup> H NMR and NOESY Spectra of OXB-Amine Complex <b><i>syn-1e·2f</i></b>                         | S-47 |
| <sup>1</sup> H NMR and NOESY Spectra of OXB-Amine Complex <b><i>syn-1f·2b</i></b>                         | S-52 |

**General Procedure for the Preparation and NMR Measurements of Amine-OXB Complexes.** To a stirred suspension of the corresponding *N*-sulfonyl amino acid [ $R^1CH(R^2SO_2NH)CO_2H$ ]<sup>1</sup> (0.60 mmol) in dry (CaH<sub>2</sub>) CH<sub>2</sub>Cl<sub>2</sub> (4 mL) at room temperature was added dichlorophenylborane (0.086 mL, 0.66 mmol). After being stirred for 0.5-1 h, the mixture was concentrated in vacuo. The residue was dissolved in dry CDCl<sub>3</sub> (CaH<sub>2</sub>) or C<sub>6</sub>D<sub>6</sub> (K) to prepare 0.1 M stock solution. To the stock solution of OXB **1** (0.1 M) (0.6 mL, 0.060 mmol) in a 5 mm NMR tube was added amine **2** (0.06 mmol). After sealing the tube, the resulting solution of amine-OXB complex was analyzed by <sup>1</sup>H NMR, <sup>1</sup>H, <sup>1</sup>H-COSY, and NOESY.

**OXB 1a:** <sup>1</sup>H NMR (500 MHz, CDCl<sub>3</sub>) δ 2.41 (3H, s), 3.41 (1H, dd, *J* = 2.6 and 13.9 Hz), 3.73 (1H, dd, *J* = 5.5 and 13.9 Hz), 4.60 (1H, dd, *J* = 2.6 and 5.3 Hz), 7.24 (2H, m), 7.30 (2H, m), 7.35-7.41 (5H, m), 7.53-7.59 (3H, m), 7.84 (2H).

**OXB 1b:** <sup>1</sup>H NMR (500 MHz, CDCl<sub>3</sub>) δ 3.04 (1H, s), 3.45 (1H, dd, *J* = 2.6 and 13.8 Hz), 3.60 (1H, dd, *J* = 5.6 and 14.0 Hz), 4.87 (1H, dd, *J* = 2.7 and 5.6 Hz), 7.22 (1H, t, *J* = 7.4 Hz), 7.21-7.34 (4H, m), 7.43 (2H, t, *J* = 7.5 Hz), 7.57 (1H, t, *J* = 7.5 Hz), 7.94 (2H, d, *J* = 7.0 Hz).

**OXB 1c:** <sup>1</sup>H NMR (500 MHz, C<sub>6</sub>D<sub>6</sub>) δ 1.67 (3H, d, *J* = 6.5 Hz), 1.74 (3H, s), 4.60 (1H, m), 5.95 (1H, m), 6.44 (2H, d, *J* = 7.9 Hz), 7.18-7.27 (5H, m), 7.43-7.51 (3H, m), 7.59 (2H, d, *J* = 8.0 Hz), 8.00 (2H, d, *J* = 8.4 Hz), 8.41 (2H, d, *J* = 6.8 Hz), 8.51 (1H, s).

**OXB 1d:** <sup>1</sup>H NMR (500 MHz, CDCl<sub>3</sub>) δ 0.89 (3H, d, *J* = 6.8 Hz), 1.23 (3H, d, *J* = 7.0 Hz), 2.38 (3H, s), 2.66 (1H, m), 4.26 (1H, dd, *J* = 1.1 and 3.4 Hz), 7.21 (2H, d, *J* = 7.7 Hz), 7.45 (2H, t, *J* = 7.4 Hz), 7.56-7.60 (3H, m), 8.08 (2H, d, *J* = 7.7 Hz).

**OXB 1e:** <sup>1</sup>H NMR (500 MHz, CDCl<sub>3</sub>) δ 1.71 (3H, d, *J* = 7.0 Hz), 2.39 (3H, s), 4.35 (1H, q, *J* = 7.0 Hz), 7.24 (2H, d, *J* = 8.1 Hz), 7.46 (2H, t, *J* = 7.7 Hz), 7.57-7.62 (3H, m), 8.10 (2H, d, *J* = 6.9 Hz).

**OXB 1f:**  $^1\text{H}$  NMR (500 MHz,  $\text{CDCl}_3$ )  $\delta$  1.81 (3H, d,  $J = 7.1$  Hz), 4.67 (6H, q,  $J = 7.1$  Hz), 7.48 (2H, m), 7.65 (1H, t,  $J = 7.7$  Hz), 7.08 (2H, d,  $J = 7.3$  Hz).

**OXB-Amine Complex *syn*- and *anti*-1a·2a:**  $^1\text{H}$  NMR (500 MHz,  $\text{CDCl}_3$ )  $\delta$  1.43 (1H for

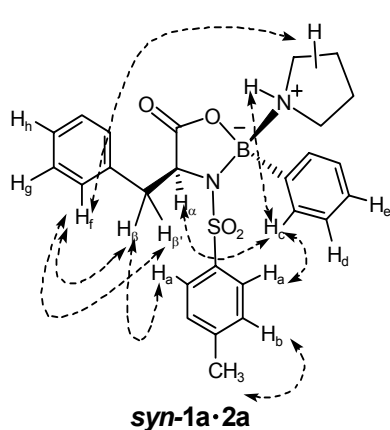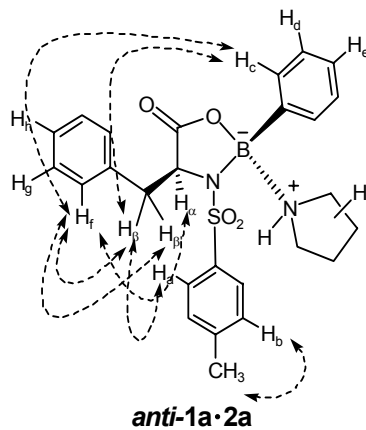

*syn* isomer, m, pyrrolidine CH), 1.59-1.68 (4H for *syn* isomer, m, pyrrolidine CH), 1.75-1.82 (2H for *anti* isomer, m, pyrrolidine CH), 1.95-2.03 (2H for *anti* isomer, m, pyrrolidine

CH), 2.28 (3H for *syn* isomer, s,  $\text{CH}_3$ ), 2.32 (3H for *anti* isomer, s,  $\text{CH}_3$ ), 2.62 (1H for *syn* isomer, m, pyrrolidine CH), 2.67 (1H for *anti* isomer, dd,  $J = 6.0$  and  $14.4$  Hz,  $\text{H}_\beta$ ), 2.77-2.81 (1H for *syn* isomer, m, pyrrolidine CH and 1H for *anti* isomer, m, pyrrolidine CH), 2.92-3.02 (1H for *syn* isomer, m, pyrrolidine CH and 3H for *anti* isomer, m, pyrrolidine CH (x2) and  $\text{H}_{\beta'}$ ), 3.47 (1H for *syn* isomer, dd,  $J = 2.1$  and  $13.6$  Hz,  $\text{H}_\beta$ ), 3.65 (1H for *syn* isomer, dd,  $J = 5.4$  and  $13.6$  Hz,  $\text{H}_{\beta'}$  and 1H for *anti* isomer, m, pyrrolidine CH), 4.00 (1H for *syn* isomer, dd,  $J = 2.3$  and  $5.4$  Hz,  $\text{H}_\alpha$ ), 4.72 (1H for *anti* isomer, dd,  $J = 3.7$  and  $5.9$  Hz,  $\text{H}_\alpha$ ), 5.35 (1H for *syn* isomer, br, NH), 6.43 (2H for *anti* isomer, d,  $J = 7.3$  Hz,  $\text{H}_f$ ), 6.48 (for *anti* isomer 1H, br, NH), 6.82 (2H for *syn* isomer, d,  $J = 8.3$  Hz,  $\text{H}_a$ ), 6.89 (2H for *syn* isomer, d,  $J = 8.1$  Hz,  $\text{H}_b$ ), 6.96 (2H for *anti* isomer, t,  $J = 7.7$  Hz,  $\text{H}_g$ ), 7.04 (2H for *anti* isomer, d,  $J = 8.1$  Hz,  $\text{H}_b$ ), 7.08 (1H for *anti* isomer, t,  $J = 7.4$  Hz,  $\text{H}_h$ ), 7.14 (2H for *anti* isomer, d,  $J = 7.2$  Hz,  $\text{H}_c$ ), 7.15-7.22 (2H for *syn* isomer, m,  $\text{H}_d$  and 4H for *anti* isomer, m,  $\text{H}_a$ ,  $\text{H}_d$ ), 7.26-7.36 (6H for *syn* isomer, m,  $\text{H}_c$ ,  $\text{H}_e$ ,  $\text{H}_g$ ,  $\text{H}_h$  and 1H for *anti* isomer, m,  $\text{H}_c$ ), 7.67 (2H for *syn* isomer, d,  $J = 7.5$  Hz,  $\text{H}_f$ ).

**OXB-Amine Complex *syn-1a·2b*:**  $^1\text{H}$  NMR (500 MHz,  $\text{CDCl}_3$ )  $\delta$  2.33 (3H, s,  $\text{CH}_3$ ),

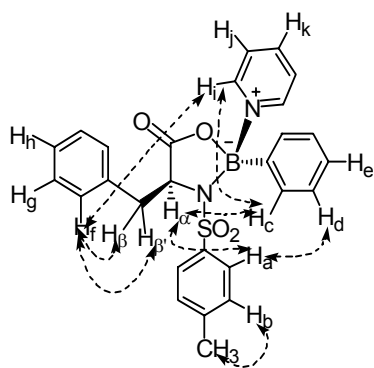

***syn-1a·2b***

3.46 (1H,  $J = 7.1$  and  $13.1$  Hz,  $\text{H}_\beta$ ), 3.66 (1H, dd,  $J = 6.2$  and  $13.7$  Hz,  $\text{H}_{\beta'}$ ), 4.40 (1H, dd,  $J = 1.7$  and  $6.1$  Hz,  $\text{H}_\alpha$ ), 6.81 (2H, d,  $J = 8.5$  Hz), 6.86-6.88 (3H, m,  $\text{H}_c$ ,  $\text{H}_h$ ), 6.93 (2H, t,  $J = 7.5$  Hz,  $\text{H}_g$ ), 6.96 (2H, d,  $J = 8.5$  Hz,  $\text{H}_b$ ), 7.11 (2H, t,  $J = 7.5$  Hz,  $\text{H}_d$ ), 7.26 (1H, t,  $J = 7.5$  Hz,  $\text{H}_e$ ), 7.30 (2H, d,  $J = 7.5$  Hz,  $\text{H}_f$ ), 7.39 (2H, t,  $J = 7.2$  Hz,  $\text{H}_j$ ), 7.92-7.95 (1H, t,  $J = 8.0$  Hz,  $\text{H}_k$ ),

8.58-8.59 (2H,  $J = 5.5$  Hz,  $\text{H}_i$ ).

**OXB-Amine Complex *syn-1a·2c*:**  $^1\text{H}$  NMR (500 MHz,  $\text{C}_6\text{D}_6$ )  $\delta$  0.51 (3H, t,  $J = 7.2$  Hz,

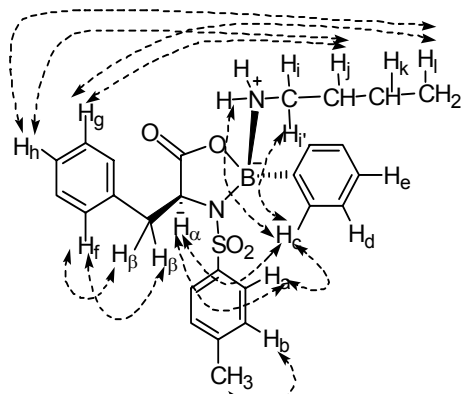

***syn-1a·2c***

$\text{H}_l$ ), 0.62-0.65 (2H, m,  $\text{H}_k$ ), 0.76-0.81 (2H, m,  $\text{H}_j$ ), 1.97 (3H, s,  $\text{CH}_3\text{C}_6\text{H}_4\text{SO}_2$ ), 2.13-2.15 (2H, m, NH and  $\text{H}_i$ ), 2.30 (1H, m,  $\text{H}_{i'}$ ), 3.67 (1H, dd,  $J = 1.8$  and  $13.1$  Hz,  $\text{H}_\beta$ ), 4.07 (1H, dd,  $J = 5.2$  and  $13.1$  Hz,  $\text{H}_{\beta'}$ ), 4.49 (1H, dd,  $J = 2.1$  and  $5.3$  Hz,  $\text{H}_\alpha$ ), 5.05 (1H, br, NH), 6.72 (2H, d,  $J = 8.1$  Hz,  $\text{H}_b$ ), 7.11 (2H, d,  $J = 8.1$  Hz,  $\text{H}_a$ ), 7.14 (1H, t,

$J = 7.4$  Hz,  $\text{H}_h$ ), 7.35-7.41 (5H, m,  $\text{H}_d$ ,  $\text{H}_e$ ,  $\text{H}_g$ ), 7.63 (2H, m,  $\text{H}_c$ ), 8.06 (2H, d,  $J = 7.3$  Hz,  $\text{H}_f$ ).

**OXB-Amine Complex *syn-1b·2b*:**  $^1\text{H}$  NMR (500 MHz,  $\text{C}_6\text{D}_6$ )  $\delta$  1.96 (3H, s,  $\text{CH}_3\text{SO}_2$ ),

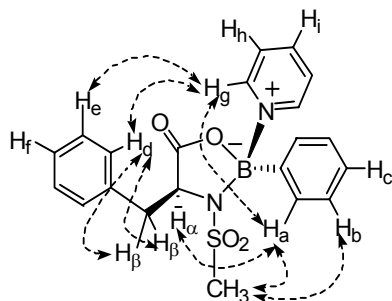

***syn-1b·2b***

3.74 (1H, dd,  $J = 1.0$  and  $13.4$  Hz,  $\text{H}_\beta$ ), 3.84 (1H, dd,  $J = 6.2$  and  $13.5$  Hz,  $\text{H}_{\beta'}$ ), 4.43 (1H, dd,  $J = 1.7$  and  $6.4$  Hz,  $\text{H}_\alpha$ ), 6.27 (2H, t,  $J = 7.0$  Hz,  $\text{H}_h$ ), 6.62 (1H, t,  $J = 7.4$  Hz,  $\text{H}_f$ ), 6.67 (1H, t,  $J = 7.7$  Hz,  $\text{H}_i$ ), 6.71 (2H, t,  $J = 7.5$  Hz,  $\text{H}_e$ ), 7.22-7.27 (3H, m,  $\text{H}_b$ ,  $\text{H}_c$ ), 7.41 (2H, d,  $J = 6.9$  Hz), 7.55 (2H, d,  $J = 7.6$

Hz), 8.39 (2H, d,  $J = 5.8$  Hz).



**OXB-Amine Complex *syn-1e·2d*:**  $^1\text{H NMR}$  (500 MHz,  $\text{CDCl}_3$ )  $\delta$  1.54 (3H, d,  $J = 6.9$

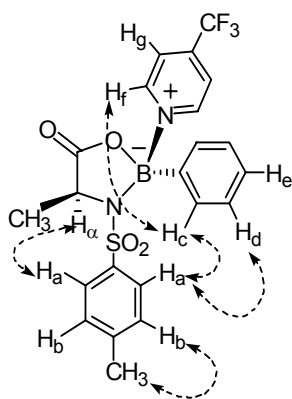

***syn-1e·2d***

Hz, 4- $\text{CH}_3$ ), 2.31 (3H, s,  $\text{CH}_3\text{C}_6\text{H}_4\text{SO}_2$ ), 4.13 (1H, q,  $J = 6.9$  Hz,  $\text{H}_\alpha$ ), 6.82 (2H, d,  $J = 8.1$  Hz,  $\text{H}_a$ ), 6.92 (2H, d,  $J = 8.1$  Hz,  $\text{H}_b$ ), 7.04 (2H, br,  $\text{H}_c$ ), 7.17 (2H, t,  $J = 7.5$  Hz,  $\text{H}_d$ ), 7.29 (1H, t,  $J = 7.4$  Hz,  $\text{H}_e$ ), 7.96 (2H, br,  $\text{H}_g$ ), 9.26 (2H, br,  $\text{H}_f$ ); minor ***anti-1e·2d*** resonated at 1.41 (3H, d,  $J = 6.9$  Hz, 4- $\text{CH}_3$ ) and 3.96 (1H, q,  $J = 6.9$  Hz,  $\text{H}_\alpha$ ).

**OXB-Amine Complex *syn-1e·2e*:**  $^1\text{H NMR}$  (500 MHz,  $\text{CDCl}_3$ )  $\delta$  1.56 (3H, d,  $J = 7.0$

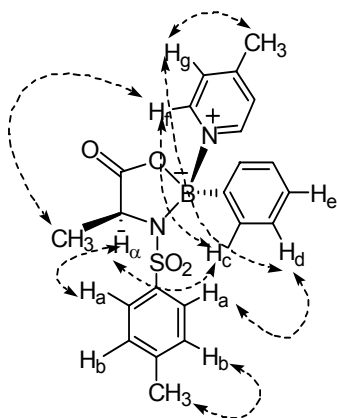

***syn-1e·2e***

Hz, 4- $\text{CH}_3$ ), 2.30 (3H, s,  $\text{CH}_3\text{C}_6\text{H}_4\text{SO}_2$ ), 2.61 (3H, s, 4- $\text{CH}_3$   $\text{C}_6\text{H}_4\text{N}$ ), 4.09 (1H, q,  $J = 7.0$  Hz,  $\text{H}_\alpha$ ), 6.79 (2H, d,  $J = 8.3$  Hz,  $\text{H}_a$ ), 6.90 (2H, d,  $J = 8.1$  Hz,  $\text{H}_b$ ), 6.99 (2H, d,  $J = 8.0$  Hz,  $\text{H}_c$ ), 7.12 (2H, t,  $J = 7.6$  Hz,  $\text{H}_d$ ), 7.25 (1H, t,  $J = 7.9$  Hz,  $\text{H}_e$ ), 7.55 (2H, d,  $J = 6.2$  Hz,  $\text{H}_g$ ), 8.93 (2H, d,  $J = 6.6$  Hz,  $\text{H}_f$ ) [minor ***anti-1e·2e*** resonated at 1.32 (3H, d,  $J = 6.9$  Hz, 4- $\text{CH}_3$ ), 2.50 (3H, s, 4- $\text{CH}_3\text{C}_6\text{H}_4\text{N}$ ), and 4.23 (1H, q,  $J = 6.9$  Hz,  $\text{H}_\alpha$ )].

**OXB-Amine Complex *syn-1e·2f*:**  $^1\text{H NMR}$  (500 MHz,  $\text{CDCl}_3$ )  $\delta$  1.57 (3H, d,  $J = 7.0$

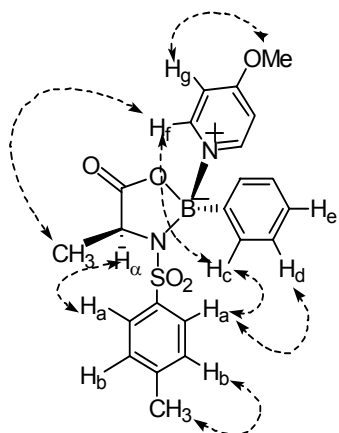

***syn-1e·2f***

Hz, 4- $\text{CH}_3$ ), 2.30 (3H, s,  $\text{CH}_3\text{C}_6\text{H}_4\text{SO}_2$ ), 4.04 (3H, s, OMe), 4.08 (1H, q,  $J = 7.0$  Hz,  $\text{H}_\alpha$ ), 6.79 (2H, d,  $J = 8.3$  Hz,  $\text{H}_a$ ), 6.90 (2H, d,  $J = 8.1$  Hz,  $\text{H}_b$ ), 7.00 (2H, d,  $J = 6.9$  Hz,  $\text{H}_c$ ), 7.11-7.15 (4H, m,  $\text{H}_d$ ,  $\text{H}_g$ ), 7.23-7.26 (1H, m,  $\text{H}_e$ ), 8.87 (2H, d,  $J = 7.3$  Hz,  $\text{H}_f$ ) [minor ***anti-1e·2f*** resonated at 1.32 (3H, d, 4- $\text{CH}_3$ )].

**OXB-Amine Complex *syn*- and *anti*-1f·2b:**  $^1\text{H}$  NMR (500 MHz,  $\text{CDCl}_3$ )  $\delta$  1.47 (3H for

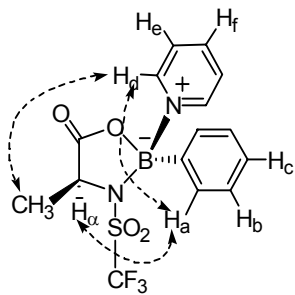

***syn*-1f·2b**

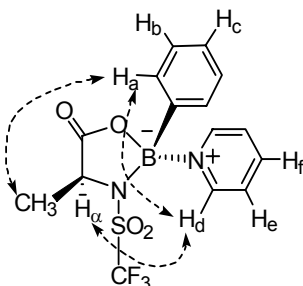

***anti*-1f·2b**

*syn* isomer, d,  $J = 7.0$  Hz, 4- $\text{CH}_3$ ), 1.61 (3H for *anti*, d,  $J = 7.0$  Hz, 4- $\text{CH}_3$ ), 4.41 (1H for *anti* isomer, q,  $J = 7.0$  Hz,  $\text{H}_\alpha$ ), 4.43 (1H for *syn* isomer, q,  $J = 7.0$  Hz,  $\text{H}_\alpha$ ), 7.22-7.26 (5H for *syn* isomer, m,  $\text{H}_a$ ,

$\text{H}_b$ , and  $\text{H}_c$ ), 7.35-7.36 (3H for *anti* isomer, m,  $\text{H}_b$ ,  $\text{H}_c$ ), 7.55 (2H for *anti* isomer, br,  $\text{H}_a$ ), 7.73 (2H for *anti* isomer, t,  $J = 7.0$  Hz,  $\text{H}_e$ ), 7.84 (2H for *syn* isomer, t,  $J = 7.1$  Hz,  $\text{H}_e$ ), 8.25 (1H for *anti* isomer, t,  $J = 7.7$  Hz,  $\text{H}_f$ ), 8.29 (1H for *syn* isomer, t,  $J = 7.7$  Hz,  $\text{H}_f$ ), 8.69 (2H for *anti* isomer, d,  $J = 5.7$  Hz,  $\text{H}_d$ ), 8.98 (2H for *syn* isomer, d,  $J = 5.5$  Hz,  $\text{H}_d$ ).
